# Supplementary material for: Cu2O-catalyzed selective 1,2-addition of acetonitrile to α,β-unsaturated aldehydes
Source: Royal Society of Chemistry journal article supplement (doi:10.1039/d0qo00024h), 2020-01-01
Supplement: d0qo00024h1.pdf [file d0qo00024h1.pdf]

## Supporting Information

### **Cu<sub>2</sub>O-Catalyzed Selective 1,2-Addition of Acetonitrile to $\alpha,\beta$ -Unsaturated Aldehydes**

Fengrui Che,<sup>a</sup> Maorong Wang,<sup>b</sup> Chunzheng Yu,<sup>a</sup> Xiangyu Sun,<sup>a</sup> Donghua Xie,<sup>a</sup> Zonghua Wang\*<sup>a</sup> and Yuexia Zhang\*<sup>a</sup>

<sup>a</sup>College of Chemistry and Chemical Engineering, Shandong Sino-Japanese Center for Collaborative Research of Carbon Nanomaterials, Qingdao University, 308 Ningxia Road, Qingdao 266071, China

<sup>b</sup>State Key Laboratory of Bio-Fibers and Eco-Textiles, Qingdao University, 308 Ningxia Road, Qingdao 266071, China

*E-mail:* zhangyx@qdu.edu.cn; wangzonghua@qdu.edu.cn

#### Table of contents

|     |                                                                                             |     |
|-----|---------------------------------------------------------------------------------------------|-----|
| I   | General information                                                                         | S2  |
| II  | General procedure for 1,2-addition of acetonitrile to $\alpha,\beta$ -unsaturated aldehydes | S3  |
| III | Gram scale synthesis of <b>2a</b> and synthetic transformations of product <b>2a</b>        | S4  |
| IV  | Deuteration experiments                                                                     | S7  |
| V   | Characterizations data for all products                                                     | S10 |
| VI  | <sup>1</sup> H NMR, <sup>13</sup> C NMR and <sup>19</sup> F NMR spectra                     | S21 |
| VII | References                                                                                  | S51 |

## I. General information

All reagents and solvents were purchased from J&K Chemicals, Energy Chemical or other commercial suppliers and used as received without further purification. Proton nuclear magnetic resonance ( $^1\text{H}$  NMR) spectra were recorded on a Bruker Avance III HD 400 (400 MHz) spectrometer, Bruker Avance 500 (500 MHz) spectrometer or Bruker Avance 600 (600 MHz) spectrometer. Chemical shifts were recorded in parts per million (ppm,  $\delta$ ) relative to tetramethylsilane ( $\delta$  0.00).  $^1\text{H}$  NMR splitting patterns are designated as singlet (s), doublet (d), triplet (t), quartet (q), dd (doublet of doublets); m (multiplets), and etc. All first-order splitting patterns were assigned on the basis of the appearance of the multiplet. Splitting patterns that could not be easily interpreted are designated as multiplet (m) or broad (br). Carbon nuclear magnetic resonance ( $^{13}\text{C}$  NMR) spectra were recorded on a Bruker Avance III HD 400 (100 MHz), Bruker Avance 500 (125 MHz) spectrometer or Bruker Avance 600 (150 MHz) spectrometer. High resolution mass spectral analysis (HRMS) was performed on an Ultima Global spectrometer with an ESI source. Flash chromatography was performed using Qingdao Haiyang silica gel 100 - 200 with distilled solvents. Visualization was performed using a UV lamp.

## II. General procedure for 1,2-addition of acetonitrile to $\alpha,\beta$ -unsaturated aldehydes

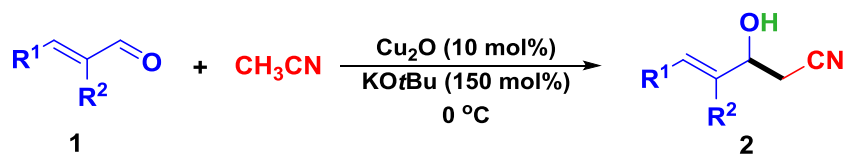

To a 4 mL vial with a magnetic stir bar was added  $\text{Cu}_2\text{O}$  (5.7 mg, 0.04 mmol, 10 mol%),  $\text{KOtBu}$  (67.2 mg, 0.6 mmol, 150 mol%) and  $\text{CH}_3\text{CN}$  (2.0 mL), the vial was cooled to  $0\text{ }^\circ\text{C}$ . 0.4 mmol  $\alpha,\beta$ -unsaturated aldehyde (1) was then added and the resulting mixture was stirred at  $0\text{ }^\circ\text{C}$  (in ice bath) for about 1 – 10 min. The mixture was purified immediately by silica gel column chromatography once complete consumption of  $\alpha,\beta$ -unsaturated aldehyde as monitored by TLC to afford the desired product 2.

### III. Gram scale synthesis of **2a** and synthetic transformations of product **2a**

#### 1. Gram scale synthesis of **2a**

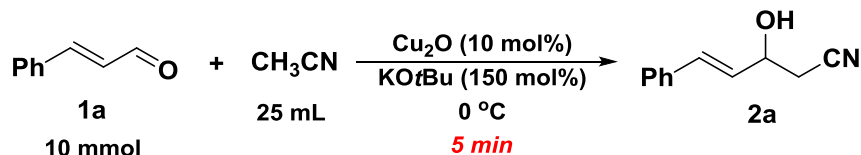

To a 50 mL round bottom flask equipped with a magnetic stir bar, was added  $\text{Cu}_2\text{O}$  (143.1 mg, 1.0 mmol, 10 mol%),  $\text{KO}^t\text{Bu}$  (1683.0 mg, 15.0 mmol, 150 mol%) and  $\text{CH}_3\text{CN}$  (25 mL). The flask was then located in the ice bath to cool to  $0\text{ }^\circ\text{C}$  without stirring. After that, **1a** (1321.6 mg, 10.0 mmol) was added and the resulting mixture was stirred to  $0\text{ }^\circ\text{C}$  for 5 min. The mixture was concentrated under reduced pressure and purified by silica gel column chromatography (petroleum ether/ethyl acetate =3:1) to afford compound **2a** as a pale yellow oil, 1364.6 mg, 79% yield.

#### 2. Hydrolysis of **2a** to amide **3**<sup>1</sup>

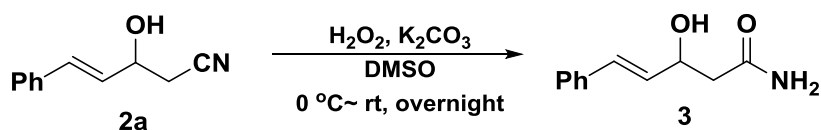

To a stirred solution of **2a** (86.5 mg, 0.5 mmol) in DMSO (1 mL), cooled in a ice bath, was added 30%  $\text{H}_2\text{O}_2$  (200  $\mu\text{L}$ ) and  $\text{K}_2\text{CO}_3$  (345.5 mg, 5.0 equiv), the mixture was allowed to warm up to room temperature. After 5 min, distilled water (20 mL) was added. The reaction mixture stirred at room temperature overnight until the completion of **2a** (monitored by TLC). The mixture was extracted with dichloromethane ( $3 \times 20\text{ mL}$ ). The combined organic phase was dried over  $\text{Na}_2\text{SO}_4$  and concentrated under reduced pressure. The crude product was purified by silica gel column chromatography (petroleum ether/ethyl acetate/methanol = 3:1:0.2) to afford compound **3** as white solid, 91.0 mg, 95% yield.

### 3. Hydrolysis of 2a to acid 4<sup>2</sup>

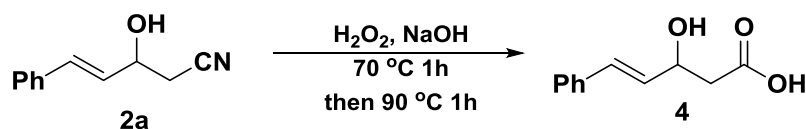

To a 50 mL round bottom flask equipped with a magnetic stir bar, was added the **2a** (86.5 mg, 0.5 mmol), 3 M NaOH (3.7 mL), 30% H<sub>2</sub>O<sub>2</sub> (1.3 mL). The reaction mixture was heated at 70 °C for 1 h and 90 °C for another 1 h, the reaction mixture was then cooled to room temperature. The solution was washed once with ethyl ether (3.0 mL). The aqueous solution was acidified with 2 M HCl (10 mL) and then extracted with dichloromethane (3 × 20 mL). The combined organic phase was dried over Na<sub>2</sub>SO<sub>4</sub> and concentrated under reduced pressure. The residue was purified by silica gel column chromatography (petroleum ether/ethyl acetate =2:1) to afford compound **4** as a white solid, 89.4 mg, 93% yield.

### 4. Transformation of 2a to functionalized benzo[*b*]furans<sup>3</sup>

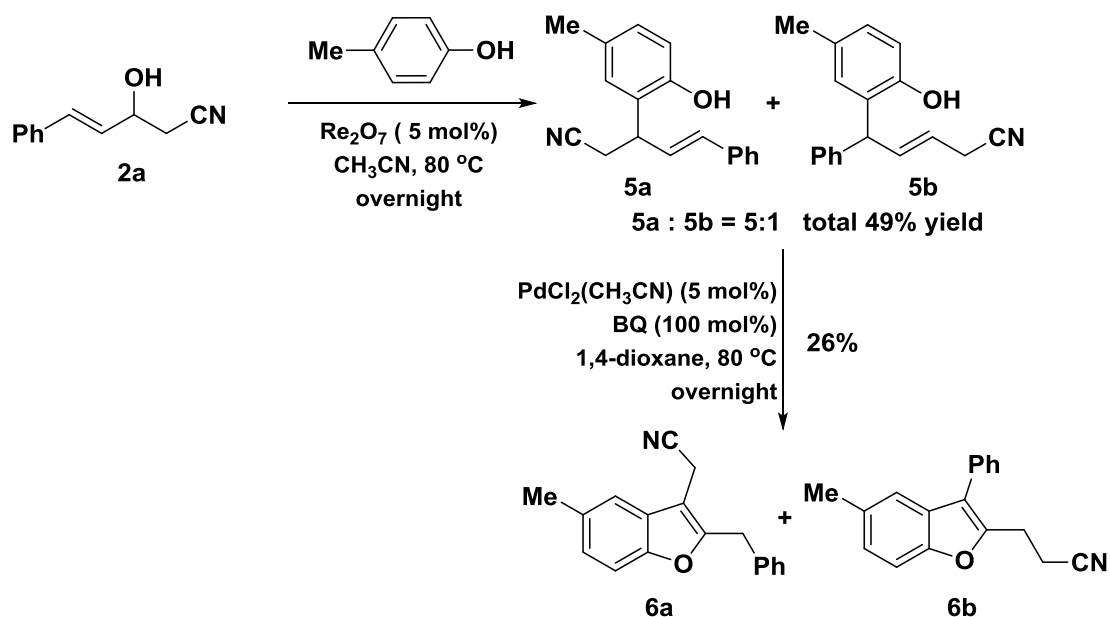

Step 1: To a 50 mL round bottom flask equipped with a magnetic stir bar, was added **2a** (86.5 mg, 0.5 mmol), *p*-cresol (59.5 mg, 1.1 equiv), Re<sub>2</sub>O<sub>7</sub> (12.1 mg, 5 mol%) and CH<sub>3</sub>CN (2.0 mL). A refluxed condenser was attached, and then the reaction mixture was stirred at 80 °C overnight until complete consumption of **2a** as monitored by TLC. The mixture was concentrated under reduced pressure and purified by silica gel

column chromatography (petroleum ether/ethyl acetate =10:1) to afford **5a** and **5b** as a mixture in 49% combined yield.

Step 2: To a 10 mL sealed tube equipped with a magnetic stir bar, was added mixed **5a** and **5b** obtained above (64.0 mg), PdCl<sub>2</sub>(CH<sub>3</sub>CN)<sub>2</sub> (3.2 mg, 5 mol%), benzoquinone (26.3 mg, 1.0 equiv). Then the mixture was dissolved in 1,4-dioxane (1.0 mL). The reaction mixture was placed in a preheated oil bath at 80 °C and stirred at 80 °C overnight. After consumption of **5a** and **5b** as monitored by TLC, the mixture was cooled to room temperature. Evaporation of the solvent followed by purification by silica gel column chromatography (petroleum ether/ethyl acetate =20:1) to afford **6a** and **6b** in 26% combined yield.

#### IV. Deuteration experiments

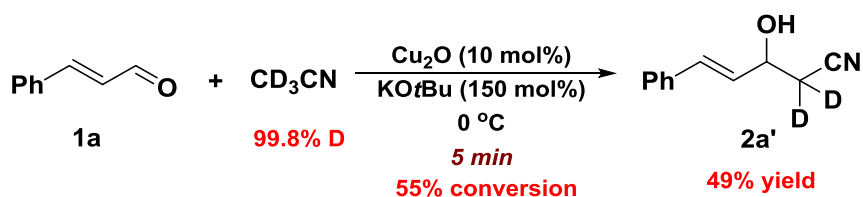

To a 4 mL vial with magnetic stir bar was added  $\text{Cu}_2\text{O}$  (5.7 mg, 0.04 mmol, 10 mol%),  $\text{KOtBu}$  (0.6 mmol, 67.2 mg, 150 mol%) and  $\text{CD}_3\text{CN}$  (2.0 mL, 99.8% D), the vial was then cooled to  $0\text{ }^\circ\text{C}$ . **1a** (52.9 mg, 0.4 mmol) was added and the resulting mixture was stirred at  $0\text{ }^\circ\text{C}$  (in ice bath) for 5 min. The mixture was purified immediately by silica gel column chromatography (petroleum ether/ethyl acetate =3:1) to afford **1a** 23.8 mg, **2a'** 34.3 mg.

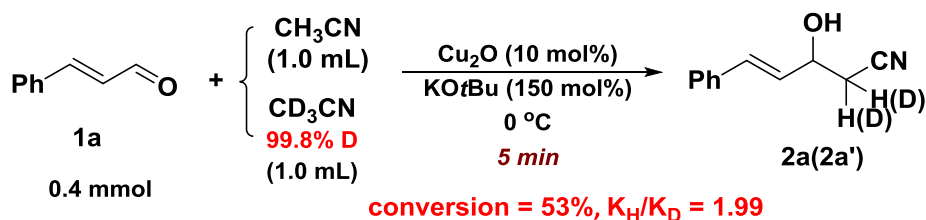

To a 4 mL vial with magnetic stir bar was added  $\text{Cu}_2\text{O}$  (5.7 mg, 0.04 mmol, 10 mol%),  $\text{KOtBu}$  (0.6 mmol, 67.2 mg, 150 mol%) and 2.0 mL 1:1 mixture of  $\text{CH}_3\text{CN}$  and  $\text{CD}_3\text{CN}$ , the vial was then cooled to  $0\text{ }^\circ\text{C}$ . **1a** (52.9 mg, 0.4 mmol) was added and the resulting mixture was stirred at  $0\text{ }^\circ\text{C}$  (in ice bath) for 5 min. The mixture was purified immediately by silica gel column chromatography (petroleum ether/ethyl acetate =3:1) to afford the mixture products of **2a** and **2a'**.

## $^1\text{H}$ NMR of 2a' (in $\text{CDCl}_3$ )

wmr-Oct10-2019-1  
CFR-X19X10-1-1HNMR-CDCl3

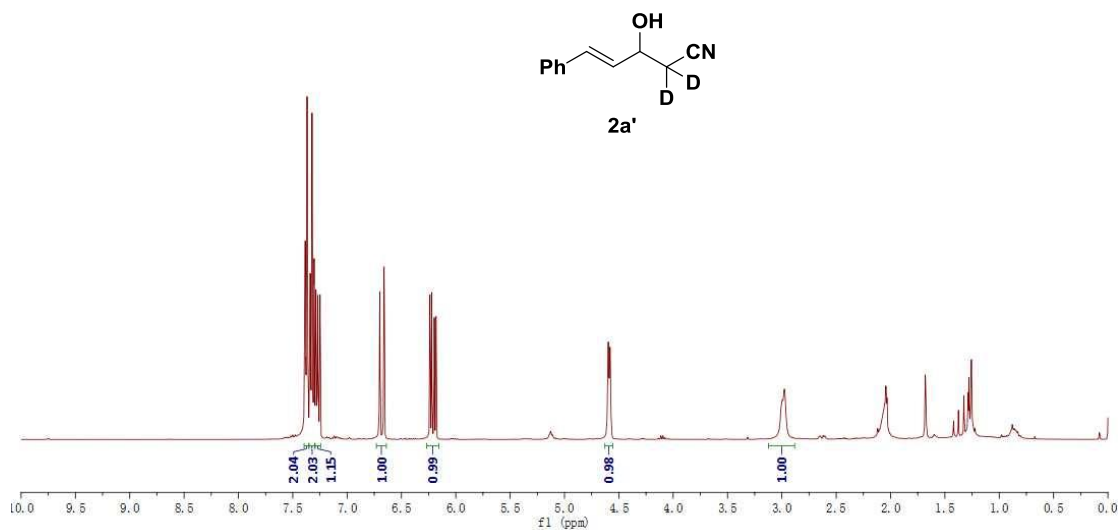

## $^1\text{H}$ NMR of 2a' after Hydrogen-Deuterium Exchange with $\text{D}_2\text{O}$ (in $\text{CDCl}_3$ )

wmr-Oct10-2019-4  
CFR-X19X10-2D-1HNMR-CDCl3

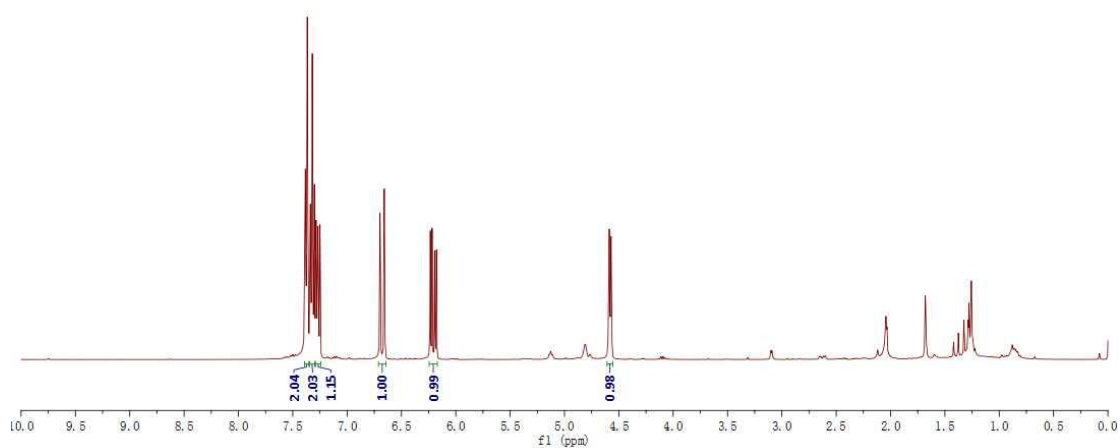



**t=5min, Conversion = 53%,  $K_H/K_D = 1.99$**

wmr-Oct10-2019-2  
GFR-X19X10-2-1HNMR-CDCl3

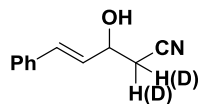

**2a (2a')**  
 **$K_H/K_D = 1.99$**

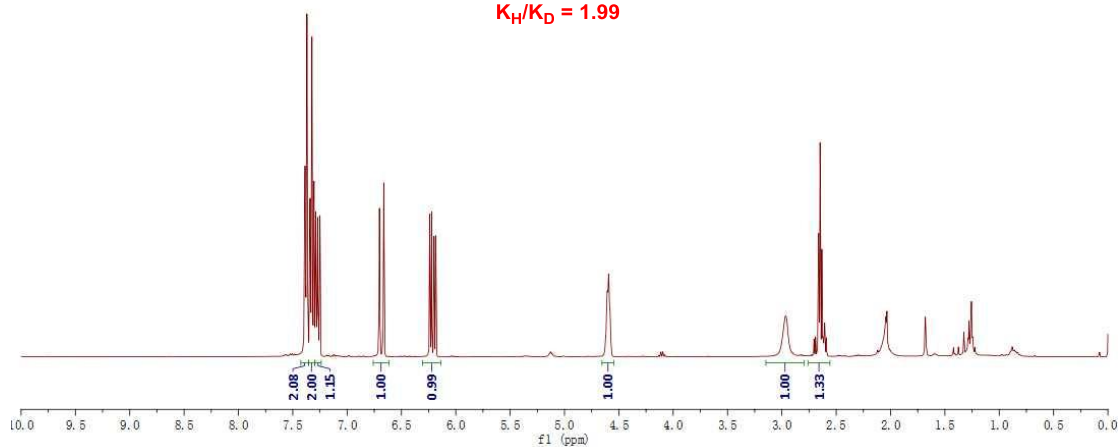

**After Hydrogen-Deuterium Exchange with  $D_2O$**

wmr-Oct10-2019-3  
GFR-X19X10-1D-1HNMR-CDCl3

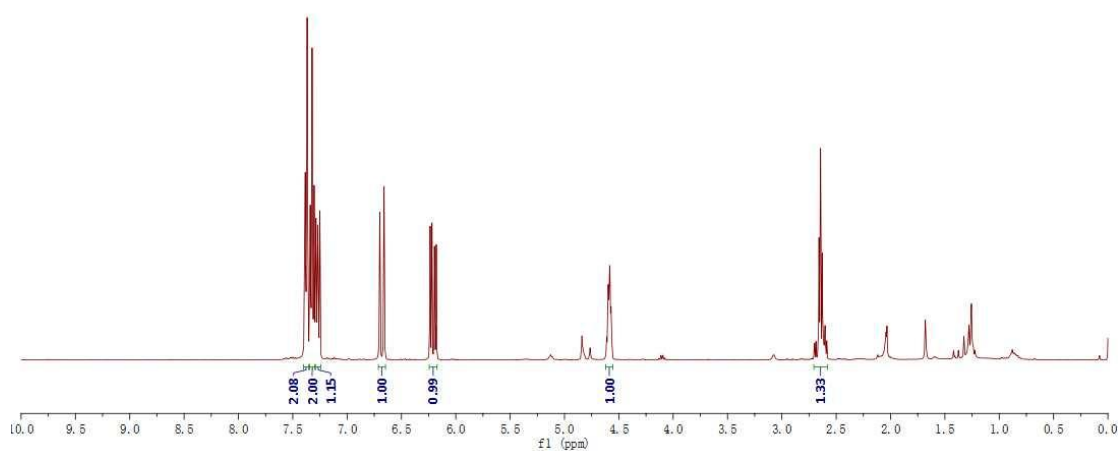

## V. Characterizations data for all products

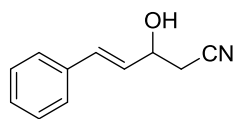

**2a**

**(E)-3-hydroxy-5-phenylpent-4-enitrile:** pale yellow oil

**<sup>1</sup>H NMR** (400 MHz, CDCl<sub>3</sub>) δ 7.40 - 7.32 (m, 2H), 7.36 - 7.30 (m, 2H), 7.30 - 7.25 (m, 1H), 6.70 (d, *J* = 16.0 Hz, 1H), 6.23 (dd, *J* = 16.0, 6.8 Hz, 1H), 4.65 - 4.60 (m, 1H), 2.73 - 2.61 (m, 2H), 2.41 (s, 1H).

**<sup>13</sup>C NMR** (100 MHz, CDCl<sub>3</sub>) δ 135.5, 133.0, 128.7, 128.4, 127.9, 126.7, 117.6, 68.7, 26.3.

**HRMS** (ESI-TOF) [M+Na]<sup>+</sup> calcd. for C<sub>11</sub>H<sub>11</sub>NONa 196.0738; found 196.0736.

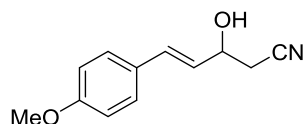

**2b**

**(E)-3-hydroxy-5-(4-methoxyphenyl)pent-4-enitrile:** pale yellow solid

**<sup>1</sup>H NMR** (400 MHz, CDCl<sub>3</sub>) δ 7.13 (d, *J* = 8.4 Hz, 2H), 6.68 (d, *J* = 8.8 Hz, 2H), 6.44 (d, *J* = 15.6 Hz, 1H), 5.90 (dd, *J* = 15.6, 6.8 Hz, 1H), 4.40 (q, *J* = 5.6 Hz, 1H), 3.62 (s, 3H), 2.67 (s, 1H), 2.53 - 2.41 (m, 2H).

**<sup>13</sup>C NMR** (100 MHz, CDCl<sub>3</sub>) δ 159.6, 132.3, 128.2, 127.9, 125.7, 117.4, 114.0, 68.7, 55.2, 26.3.

**HRMS** (ESI-TOF) [M+Na]<sup>+</sup> calcd. for C<sub>12</sub>H<sub>13</sub>NO<sub>2</sub>Na 226.0844; found 226.0850.

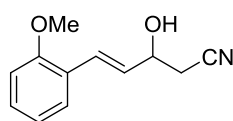

**2c**

**(E)-3-hydroxy-5-(2-methoxyphenyl)pent-4-enitrile:** pale yellow oil

**<sup>1</sup>H NMR** (400 MHz, CDCl<sub>3</sub>) δ 7.38 (dd, *J* = 7.6, 1.6 Hz, 1H), 7.25 - 7.20 (m, 1H), 6.98 (d, *J* = 16.0 Hz, 1H), 6.92 - 6.84 (m, 2H), 6.24 (dd, *J* = 16.0, 6.8 Hz, 1H), 4.59 (q, *J* = 6.4 Hz, 1H), 3.81 (s, 3H), 2.70 - 2.58 (m, 2H), 2.39 (s, 1H).

**<sup>13</sup>C NMR** (100 MHz, CDCl<sub>3</sub>) δ 157.2, 129.8, 128.9, 128.4, 127.6, 124.7, 120.9, 117.6, 111.2, 69.5, 55.7, 26.6.

**HRMS** (ESI-TOF)  $[M+Na]^+$  calcd. for  $C_{12}H_{13}NO_2Na$  226.0844; found 226.0851.

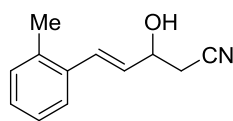

**2d**

**(E)-3-hydroxy-5-(o-tolyl)pent-4-enitrile:** pale yellow oil

**$^1H$  NMR** (400 MHz,  $CDCl_3$ )  $\delta$  7.44 – 7.41 (m, 1H), 7.19 – 7.15 (m, 3H), 6.94 (d,  $J$  = 15.6 Hz, 1H), 6.11 (dd,  $J$  = 16.0, 6.8 Hz, 1H), 4.67 – 4.61 (m, 1H), 2.74 – 2.62 (m, 3H), 2.35 (s, 3H).

**$^{13}C$  NMR** (100 MHz,  $CDCl_3$ )  $\delta$  135.8, 134.7, 130.9, 130.4, 129.4, 128.3, 126.2, 125.8, 117.1, 68.9, 26.4, 19.7.

**HRMS** (ESI-TOF)  $[M+Na]^+$  calcd. for  $C_{12}H_{13}NONa$  210.0895; found 210.0905.

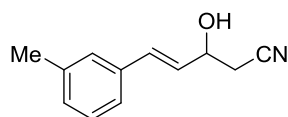

**2e**

**(E)-3-hydroxy-5-(m-tolyl)pent-4-enitrile:** pale yellow oil

**$^1H$  NMR** (400 MHz,  $CDCl_3$ )  $\delta$  7.26 – 7.17 (m, 3H), 7.10 (d,  $J$  = 7.2 Hz, 1H), 6.66 (d,  $J$  = 16.0 Hz, 1H), 6.21 (dd,  $J$  = 15.6, 6.4 Hz, 1H), 4.64 – 4.57 (m, 1H), 2.72 – 2.64 (m, 2H), 2.58 (s, 1H), 2.34 (s, 3H).

**$^{13}C$  NMR** (100 MHz,  $CDCl_3$ )  $\delta$  136.7, 133.8, 131.6, 127.7, 126.9, 126.1, 125.8, 122.3, 115.5, 67.2, 24.7, 19.7.

**HRMS** (ESI-TOF)  $[M+Na]^+$  calcd. for  $C_{12}H_{13}NONa$  210.0895; found 210.0897.

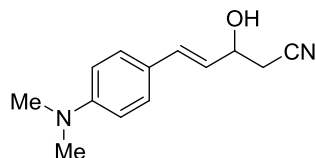

**2f**

**(E)-5-(4-(dimethylamino)phenyl)-3-hydroxypent-4-enitrile:** pale yellow oil

**$^1H$  NMR** (400 MHz,  $CDCl_3$ )  $\delta$  7.27 (d,  $J$  = 8.8 Hz, 2H), 6.66 (d,  $J$  = 8.8 Hz, 2H), 6.57 (d,  $J$  = 15.6 Hz, 1H), 6.00 (dd,  $J$  = 15.6, 7.2 Hz, 1H), 4.58 – 4.52 (m, 1H), 2.96 (s, 6H), 2.70 – 2.61 (m, 2H), 2.50 (s, 1H).

$^{13}\text{C}$  NMR (100 MHz,  $\text{CDCl}_3$ )  $\delta$  150.8, 133.5, 128.1, 123.9, 123.7, 117.7, 112.5, 69.5, 40.7, 26.7.

HRMS (ESI-TOF)  $[\text{M}+\text{H}]^+$  calcd. for  $\text{C}_{13}\text{H}_{17}\text{N}_2\text{O}$  217.1336; found 217.1339.

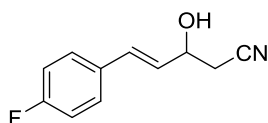

### 2g

**(E)-5-(4-fluorophenyl)-3-hydroxypent-4-enitrile:** pale yellow oil

$^1\text{H}$  NMR (400 MHz,  $\text{CDCl}_3$ )  $\delta$  7.37 – 7.32 (m, 2H), 7.04 – 6.98 (m, 2H), 6.66 (d,  $J = 16.0$  Hz, 1H), 6.14 (dd,  $J = 16.0, 6.8$  Hz, 1H), 4.64 – 4.58 (m, 1H), 2.86 (s, 1H), 2.73 – 2.61 (m, 2H).

$^{13}\text{C}$  NMR (100 MHz,  $\text{CDCl}_3$ )  $\delta$  162.6 (d,  $J_{\text{C-F}} = 246.5$  Hz), 131.7 (d,  $J_{\text{C-F}} = 3.3$  Hz), 131.6, 128.3 (d,  $J_{\text{C-F}} = 8.0$  Hz), 127.7 (d,  $J_{\text{C-F}} = 2.1$  Hz), 117.3, 115.6 (d,  $J_{\text{C-F}} = 21.6$  Hz), 68.4, 26.3.

$^{19}\text{F}$  NMR (377 MHz,  $\text{CDCl}_3$ )  $\delta$  -112.86.

HRMS (ESI-TOF)  $[\text{M}+\text{Na}]^+$  calcd. for  $\text{C}_{11}\text{H}_{10}\text{FNONa}$ , 214.0644 found, 214.0651.

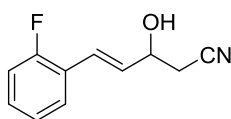

### 2h

**(E)-5-(2-fluorophenyl)-3-hydroxypent-4-enitrile:** pale yellow oil

$^1\text{H}$  NMR (400 MHz,  $\text{CDCl}_3$ )  $\delta$  7.48 – 7.44 (m, 1H), 7.31 – 7.24 (m, 1H), 7.15 – 7.04 (m, 2H), 6.88 (d,  $J = 16.0$  Hz, 1H), 6.35 (dd,  $J = 16.0, 6.8$  Hz, 1H), 4.67 (q,  $J = 5.6$  Hz, 1H), 2.77 – 2.65 (m, 2H), 2.62 (s, 1H).

$^{13}\text{C}$  NMR (100 MHz,  $\text{CDCl}_3$ )  $\delta$  160.0 (d,  $J_{\text{C-F}} = 248.6$  Hz), 130.3 (d,  $J_{\text{C-F}} = 5.2$  Hz), 129.4 (d,  $J_{\text{C-F}} = 8.5$  Hz), 127.5 (d,  $J_{\text{C-F}} = 3.4$  Hz), 125.1 (d,  $J_{\text{C-F}} = 3.3$  Hz), 123.9 (d,  $J_{\text{C-F}} = 3.6$  Hz), 123.0 (d,  $J_{\text{C-F}} = 12.0$  Hz), 116.9, 115.5 (d,  $J_{\text{C-F}} = 21.9$  Hz), 68.3, 25.9.

$^{19}\text{F}$  NMR (377 MHz,  $\text{CDCl}_3$ )  $\delta$  -117.33.

HRMS (ESI-TOF)  $[\text{M}+\text{Na}]^+$  calcd. for  $\text{C}_{11}\text{H}_{10}\text{FNONa}$  214.0644; found 214.0645.

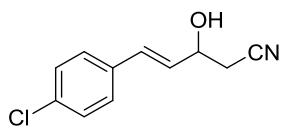

**2i**

**(E)-5-(4-chlorophenyl)-3-hydroxypent-4-enitrile:** pale yellow oil

**<sup>1</sup>H NMR** (400 MHz, CDCl<sub>3</sub>) δ 7.31 – 7.25 (m, 4H), 6.64 (d, *J* = 15.6 Hz, 1H), 6.19 (dd, *J* = 16.0, 6.8 Hz, 1H), 4.61 (q, *J* = 5.6 Hz, 1H), 2.82 (s, 1H), 2.73 – 2.60 (m, 2H).

**<sup>13</sup>C NMR** (100 MHz, CDCl<sub>3</sub>) δ 133.1, 133.0, 130.5, 127.9, 127.7, 126.9, 116.3, 67.4, 25.3.

**HRMS** (ESI-TOF) [M+Na]<sup>+</sup> calcd. for C<sub>11</sub>H<sub>10</sub>ClNONa 230.0349; found 230.0347.

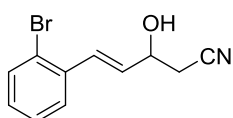

**2j**

**(E)-5-(2-bromophenyl)-3-hydroxypent-4-enitrile:** pale yellow oil

**<sup>1</sup>H NMR** (400 MHz, CDCl<sub>3</sub>) δ 7.59 – 7.52 (m, 2H), 7.30 (t, *J* = 7.6 Hz, 1H), 7.19 – 7.14 (m, 1H), 7.08 (d, *J* = 16.0 Hz, 1H), 6.22 (dd, *J* = 15.6, 6.4 Hz, 1H), 4.80 – 4.65 (m, 1H), 2.79 – 2.67 (m, 2H), 2.57 (s, 1H).

**<sup>13</sup>C NMR** (100 MHz, CDCl<sub>3</sub>) δ 132.6, 130.2, 128.9, 128.1, 126.8, 124.8, 124.4, 121.0, 114.2, 65.6, 23.4.

**HRMS** (ESI-TOF) [M+Na]<sup>+</sup> calcd. for C<sub>11</sub>H<sub>10</sub>BrNONa 273.9843; found 273.9850.

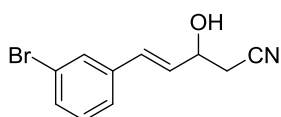

**2k**

**(E)-5-(3-bromophenyl)-3-hydroxypent-4-enitrile:** pale yellow oil

**<sup>1</sup>H NMR** (600 MHz, CDCl<sub>3</sub>) δ 7.56 (s, 1H), 7.43 (dd, *J* = 8.4, 0.6 Hz, 1H), 7.33 (d, *J* = 7.8 Hz, 1H), 7.23 (t, *J* = 7.8 Hz, 1H), 6.67 (d, *J* = 15.6 Hz, 1H), 6.26 (dd, *J* = 15.6, 6.6 Hz, 1H), 4.69 – 4.64 (m, 1H), 3.01 (s, 1H), 2.76 – 2.66 (m, 2H).

**<sup>13</sup>C NMR** (150 MHz, CDCl<sub>3</sub>) δ 137.8, 131.3, 131.2, 130.3, 129.7, 129.6, 125.5, 122.9, 117.3, 68.3, 26.4.

**HRMS** (ESI-TOF) [M+Na]<sup>+</sup> calcd. for C<sub>11</sub>H<sub>10</sub>BrNONa 273.9843; found 273.9852.

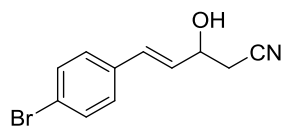

**2l**

**(E)-5-(4-bromophenyl)-3-hydroxypent-4-enitrile:** white solid

**<sup>1</sup>H NMR** (400 MHz, CDCl<sub>3</sub>) δ 7.36 (d, *J* = 8.4 Hz, 2H), 7.17 (d, *J* = 8.4 Hz, 2H), 6.55 (d, *J* = 16.0 Hz, 1H), 6.13 (dd, *J* = 16.0, 6.8 Hz, 1H), 4.60 – 4.45 (m, 1H), 2.85 (s, 1H), 2.66 – 2.53 (m, 2H).

**<sup>13</sup>C NMR** (100 MHz, CDCl<sub>3</sub>) δ 134.1, 131.4, 131.2, 128.4, 127.9, 121.9, 116.9, 68.0, 25.9.

**HRMS** (ESI-TOF) [M+Na]<sup>+</sup> calcd. for C<sub>11</sub>H<sub>10</sub>BrNONa 273.9843; found 273.9825.

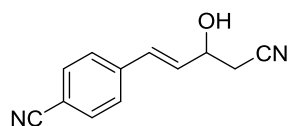

**2m**

**(E)-4-(4-cyano-3-hydroxybut-1-en-1-yl)benzonitrile:** brown solid

**<sup>1</sup>H NMR** (400 MHz, CDCl<sub>3</sub>) δ 7.56 (d, *J* = 8.4 Hz, 2H), 7.41 (d, *J* = 8.4 Hz, 2H), 6.70 (d, *J* = 16.0 Hz, 1H), 6.31 (dd, *J* = 16.0, 6.4 Hz, 1H), 4.66 – 4.60 (m, 1H), 2.71 – 2.59 (m, 2H), 2.35 (s, 1H).

**<sup>13</sup>C NMR** (100 MHz, CDCl<sub>3</sub>) δ 141.3, 132.6, 132.4, 128.7, 126.9, 118.9, 110.8, 63.1, 29.7.

**HRMS** (ESI-TOF) [M+Na]<sup>+</sup> calcd. for C<sub>12</sub>H<sub>10</sub>N<sub>2</sub>ONa 221.0691; found 221.0712.

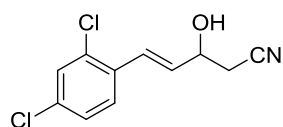

**2n**

**(E)-5-(2,4-dichlorophenyl)-3-hydroxypent-4-enitrile:** pale yellow solid

**<sup>1</sup>H NMR** (600 MHz, CDCl<sub>3</sub>) δ 7.40 (d, *J* = 8.4 Hz, 1H), 7.33 (d, *J* = 2.4 Hz, 1H), 7.17 (dd, *J* = 8.4, 2.4 Hz, 1H), 6.99 (d, *J* = 15.6 Hz, 1H), 6.18 (dd, *J* = 15.6, 6.6 Hz, 1H), 4.68 – 4.60 (m, 1H), 2.80 (s, 1H), 2.72 – 2.62 (m, 2H).

**<sup>13</sup>C NMR** (150 MHz, CDCl<sub>3</sub>) δ 134.1, 133.6, 132.1, 131.1, 129.2, 127.7, 127.5, 127.1, 116.7, 68.0, 25.9.

**HRMS** (ESI-TOF)  $[M+Na]^+$  calcd. for  $C_{11}H_9Cl_2NONa$  263.9959; found 263.9959.

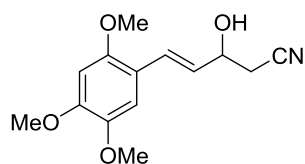

**2o**

**(E)-3-hydroxy-5-(2,4,5-trimethoxyphenyl)pent-4-enitrile:** yellow oil

**$^1H$  NMR** (400 MHz,  $CDCl_3$ )  $\delta$  7.00 – 6.92 (m, 2H), 6.51 (s, 1H), 6.14 (dd,  $J = 16.0$ , 7.2 Hz, 1H), 4.62 (q,  $J = 6.0$  Hz, 1H), 3.93 – 3.84 (m, 9H), 2.79 – 2.65 (m, 3H).

**$^{13}C$  NMR** (100 MHz,  $CDCl_3$ )  $\delta$  151.7, 150.1, 143.2, 127.3, 126.2, 117.4, 116.0, 110.0, 97.3, 69.2, 56.5, 56.4, 55.9, 26.3.

**HRMS** (ESI-TOF)  $[M+Na]^+$  calcd. for  $C_{14}H_{17}NO_4Na$  286.1055; found 286.1063.

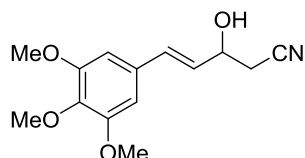

**2p**

**(E)-3-hydroxy-5-(3,4,5-trimethoxyphenyl)pent-4-enitrile:** yellow solid

**$^1H$  NMR** (400 MHz,  $CDCl_3$ )  $\delta$  6.64 – 6.56 (m, 3H), 6.14 (dd,  $J = 16.0$ , 6.8 Hz, 1H), 4.62 (q,  $J = 5.6$  Hz, 1H), 3.87 (s, 6H), 3.85 (s, 3H), 2.76 – 2.63 (m, 3H).

**$^{13}C$  NMR** (100 MHz,  $CDCl_3$ )  $\delta$  153.2, 138.2, 132.8, 131.3, 127.5, 117.2, 103.8, 68.6, 60.9, 56.1, 26.3.

**HRMS** (ESI-TOF)  $[M+Na]^+$  calcd. for  $C_{14}H_{17}NO_4Na$  286.1055; found 286.1060.

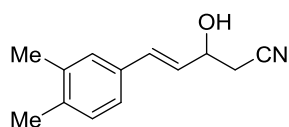

**2q**

**(E)-5-(3,4-dimethylphenyl)-3-hydroxy-4-enitrile:** pale yellow oil

**$^1H$  NMR** (400 MHz,  $CDCl_3$ )  $\delta$  7.17 (s, 1H), 7.14 – 7.07 (m, 2H), 6.62 (d,  $J = 15.6$  Hz, 1H), 6.16 (dd,  $J = 15.6$ , 6.8 Hz, 1H), 4.58 (q,  $J = 5.6$  Hz, 1H), 2.72 (s, 1H), 2.70 – 2.62 (m, 2H), 2.25 (s, 6H).

**$^{13}C$  NMR** (100 MHz,  $CDCl_3$ )  $\delta$  137.0, 136.8, 133.1, 132.9, 129.9, 127.9, 126.8, 124.2, 117.3, 68.7, 26.3, 19.7, 19.5.

**HRMS** (ESI-TOF)  $[M+Na]^+$  calcd. for  $C_{13}H_{15}NONa$  224.1051; found 224.1056.

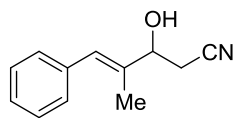

**2r**

**(E)-3-hydroxy-4-methyl-5-phenylpent-4-enitrile:** pale yellow oil

**$^1H$  NMR** (400 MHz,  $CDCl_3$ )  $\delta$  7.40 – 7.33 (m, 2H), 7.31 – 7.25 (m, 3H), 6.66 (s, 1H), 4.54 (t,  $J = 6.4$  Hz, 1H), 2.77 – 2.65 (m, 3H), 1.91 (d,  $J = 1.2$  Hz, 3H).

**$^{13}C$  NMR** (100MHz, $CDCl_3$ )  $\delta$  134.8, 134.6, 127.1, 126.4, 125.8, 125.1, 115.7, 71.3, 22.8, 11.4.

**HRMS** (ESI-TOF)  $[M+Na]^+$  calcd. for  $C_{12}H_{13}NONa$  210.0895; found 210.0899.

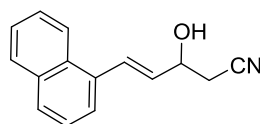

**2s**

**(E)-3-hydroxy-5-(naphthalen-1-yl)pent-4-enitrile:** pale yellow solid

**$^1H$  NMR** (400 MHz,  $CDCl_3$ )  $\delta$  8.07 (d,  $J = 8.0$  Hz, 1H), 7.87 – 7.79 (m, 2H), 7.59 – 7.42 (m, 5H), 6.26 (dd,  $J = 15.6, 6.8$  Hz, 1H), 4.74 (q,  $J = 6.0$  Hz, 1H), 2.79 – 2.67 (m, 2H), 2.51 (s, 1H).

**$^{13}C$  NMR** (100 MHz,  $CDCl_3$ )  $\delta$  133.6, 133.4, 131.3, 131.1, 130.3, 128.8, 128.7, 126.4, 126.0, 125.6, 124.3, 123.6, 117.2, 68.8, 26.5.

**HRMS** (ESI-TOF)  $[M+Na]^+$  calcd. for  $C_{15}H_{13}NONa$  246.0895; found 246.0898.

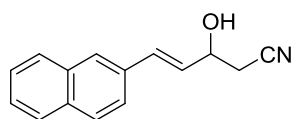

**2t**

**(E)-3-hydroxy-5-(naphthalen-2-yl)pent-4-enitrile:** pale yellow solid

**$^1H$  NMR** (600 MHz,  $CDCl_3$ )  $\delta$  7.78 – 7.73 (m, 3H), 7.69 (s, 1H), 7.54 – 7.51 (m, 1H), 7.45 – 7.43 (m, 2H), 6.79 (d,  $J = 16.2$  Hz, 1H), 6.29 (dd,  $J = 16.2, 6.6$  Hz, 1H), 4.65 – 4.58 (m, 1H), 2.94 (s, 1H), 2.69 – 2.60 (m, 2H).

**$^{13}C$  NMR** (150 MHz,  $CDCl_3$ )  $\delta$  133.3, 133.2, 132.9, 132.8, 128.3, 128.2, 128.0, 127.6, 127.1, 126.4, 126.2, 123.3, 117.4, 68.5, 26.3.



**HRMS** (ESI-TOF)  $[M+Na]^+$  calcd. for  $C_{15}H_{13}NONa$  246.0895; found 246.0900.

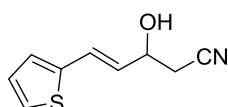

**2u**

**(E)-3-hydroxy-5-(thiophen-2-yl)pent-4-enitrile:** brown oil

**$^1H$  NMR** (400 MHz,  $CDCl_3$ )  $\delta$  7.21 (d,  $J = 4.8$  Hz, 1H), 7.01 (d,  $J = 3.2$  Hz, 1H), 6.97 (dd,  $J = 4.8, 3.6$  Hz, 1H), 6.84 (d,  $J = 15.6$  Hz, 1H), 6.05 (dd,  $J = 15.6, 6.4$  Hz, 1H), 4.62 – 4.57 (m, 1H), 2.73 – 2.61 (m, 2H), 2.26 (s, 1H).

**$^{13}C$  NMR** (100 MHz,  $CDCl_3$ )  $\delta$  140.4, 127.5, 127.2, 127.1, 126.1, 125.4, 117.0, 68.5, 26.3.

**HRMS** (ESI-TOF)  $[M+Na]^+$  calcd. for  $C_9H_9NOSNa$  202.0303; found 202.0305.

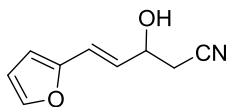

**2v**

**(E)-5-(furan-2-yl)-3-hydroxypent-4-enitrile:** brown oil

**$^1H$  NMR** (400 MHz,  $CDCl_3$ )  $\delta$  7.30 (d,  $J = 1.6$  Hz, 1H), 6.46 (dd,  $J = 16.0, 0.8$  Hz, 1H), 6.31 (dd,  $J = 3.2, 2.0$  Hz, 1H), 6.24 (d,  $J = 3.6$  Hz, 1H), 6.08 (dd,  $J = 16.0, 6.4$  Hz, 1H), 4.55 - 4.49 (m, 1H), 2.64 – 2.52 (m, 3H).

**$^{13}C$  NMR** (100 MHz,  $CDCl_3$ )  $\delta$  151.3, 142.6, 126.3, 120.7, 117.2, 111.5, 109.7, 68.1, 26.3.

**HRMS** (ESI-TOF)  $[M+Na]^+$  calcd. for  $C_9H_9NO_2Na$  186.0531; found 186.0534.

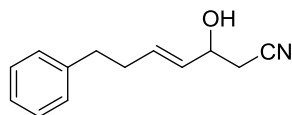

**2w**

**(E)-3-hydroxy-7-phenylhept-4-enitrile:** pale yellow oil

**$^1H$  NMR** (600 MHz,  $CDCl_3$ )  $\delta$  7.30 – 7.23 (m, 2H), 7.21 – 7.16 (m, 3H), 5.87 – 5.81 (m, 1H), 5.53 (dd,  $J = 15.0, 6.6$  Hz, 1H), 4.38 (q,  $J = 6.0$  Hz, 1H), 2.72 (t,  $J = 7.8$  Hz, 2H), 2.58 – 2.49 (m, 2H), 2.42 – 2.37 (m, 2H), 2.09 (s, 1H).

**$^{13}C$  NMR** (150 MHz,  $CDCl_3$ )  $\delta$  141.2, 133.9, 129.9, 128.4, 128.3, 126.0, 117.2, 68.5, 35.1, 33.7, 26.2.

**HRMS** (ESI-TOF)  $[M+Na]^+$  calcd. for  $C_{13}H_{15}NONa$ , 224.1051 found, 224.1056.

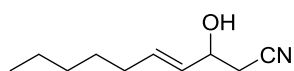

**2x**

**(E)-3-hydroxydec-4-enitrile:** pale yellow oil

**$^1H$  NMR** (500 MHz,  $CDCl_3$ )  $\delta$  5.86 – 5.79 (m, 1H), 5.54 (dd,  $J = 15.5, 7.0$  Hz, 1H), 4.45 – 4.38 (m, 1H), 2.63 – 2.53 (m, 2H), 2.09 – 2.03 (m, 3H), 1.43 – 1.36 (m, 6H), 0.95 – 0.90 (m, 3H).

**$^{13}C$  NMR** (125 MHz,  $CDCl_3$ )  $\delta$  135.9, 129.7, 117.9, 69.3, 32.6, 31.9, 29.1, 26.9, 23.0, 14.6.

**HRMS** (ESI-TOF)  $[M+Na]^+$  calcd. for  $C_{10}H_{17}NONa$  190.1208; found 190.1218.

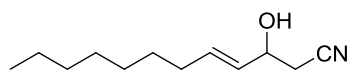

**2y**

**(E)-3-hydroxydodec-4-enitrile:** pale yellow oil

**$^1H$  NMR** (400 MHz,  $CDCl_3$ )  $\delta$  5.87 – 5.79 (m, 1H), 5.58 – 5.51 (m, 1H), 4.48 – 4.38 (m, 1H), 2.64 – 2.53 (m, 2H), 2.20 – 2.00 (m, 3H), 1.44 – 1.28 (m, 10H), 0.89 (t,  $J = 6.4$  Hz, 3H).

**$^{13}C$  NMR** (150 MHz,  $CDCl_3$ )  $\delta$  135.4, 129.1, 117.3, 68.7, 32.0, 31.7, 29.1, 28.8, 26.3, 22.6, 14.1.

**HRMS** (ESI-TOF)  $[M+Na]^+$  calcd. for  $C_{12}H_{21}NONa$  218.1521; found 218.1525.

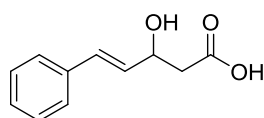

**3**

**(E)-3-hydroxy-5-phenylpent-4-enoic acid:** white solid

**$^1H$  NMR** (500 MHz,  $CD_3CN$ )  $\delta$  7.41 (d,  $J = 7.5$  Hz, 2H), 7.33 (t,  $J = 7.5$  Hz, 2H), 7.27 – 7.23 (m, 1H), 6.63 (d,  $J = 16.5$  Hz, 1H), 6.30 (dd,  $J = 16.0, 6.0$  Hz, 1H), 4.65 – 4.60 (m, 1H), 3.49 (s, 1H), 2.59 (dd,  $J = 15.5, 4.5$  Hz, 1H), 2.51 (dd,  $J = 15.5, 8.5$  Hz, 1H).

**$^{13}C$  NMR** (125 MHz,  $CD_3CN$ )  $\delta$  173.2, 137.8, 132.3, 130.5, 129.6, 128.6, 127.3, 69.4, 42.4.

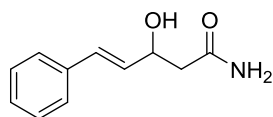

**4**

**(E)-3-hydroxy-5-phenylpent-4-enamide:** white solid

$^1\text{H NMR}$  (400 MHz, DMSO- $d_6$ )  $\delta$  7.42 – 7.38 (m, 2H), 7.32 (t,  $J = 7.2$  Hz, 3H), 7.22 (t,  $J = 7.2$  Hz, 1H), 6.83 (s, 1H), 6.54 (d,  $J = 16.0$  Hz, 1H), 6.30 (dd,  $J = 15.6, 5.2$  Hz, 1H), 5.12 (d,  $J = 4.8$  Hz, 1H), 4.55 – 4.48 (m, 1H), 2.34 – 2.23 (m, 2H).

$^{13}\text{C NMR}$  (100 MHz, DMSO- $d_6$ )  $\delta$  172.8, 137.3, 133.9, 129.1, 128.5, 127.8, 126.7, 68.7, 44.1.

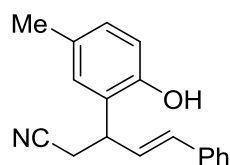

**5a**

**(E)-3-(2-hydroxy-5-methylphenyl)-5-phenylpent-4-enitrile:** pale yellow gum

$^1\text{H NMR}$  (500 MHz,  $\text{CDCl}_3$ )  $\delta$  7.39 (d,  $J = 7.5$  Hz, 2H), 7.31 (t,  $J = 7.5$  Hz, 2H), 7.26 – 7.21 (m, 1H), 7.00 (s, 1H), 6.93 (dd,  $J = 8.0, 1.0$  Hz, 1H), 6.66 (d,  $J = 8.0$  Hz, 1H), 6.57 (d,  $J = 16.0$  Hz, 1H), 6.48 (dd,  $J = 16.0, 7.5$  Hz, 1H), 5.10 (s, 1H), 4.13 (q,  $J = 7.0$  Hz, 1H), 2.90 (d,  $J = 7.0$  Hz, 2H), 2.26 (s, 3H).

$^{13}\text{C NMR}$  (150 MHz,  $\text{CDCl}_3$ )  $\delta$  150.7, 136.9, 131.9, 130.5, 128.6, 128.5, 128.4, 127.7, 126.7, 126.5, 118.7, 115.8, 40.1, 22.7, 20.6.

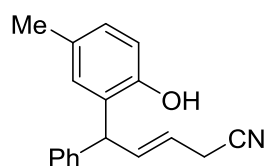

**5b**

**(E)-5-(2-hydroxy-5-methylphenyl)-5-phenylpent-3-enitrile:** pale yellow gum

$^1\text{H NMR}$  (500 MHz,  $\text{CDCl}_3$ )  $\delta$  7.30 (d,  $J = 7.5$  Hz, 2H), 7.26 – 7.21 (m, 2H), 7.19 (d,  $J = 7.0$  Hz, 2H), 6.88 (s, 1H), 6.67 (d,  $J = 8.0$  Hz, 1H), 6.35 (dd,  $J = 15.5, 7.0$  Hz, 1H), 5.34 – 5.27 (m, 1H), 5.00 (d,  $J = 7.0$  Hz, 1H), 4.69 (s, 1H), 3.14 (d,  $J = 5.5$  Hz, 2H), 2.26 (s, 3H).

$^{13}\text{C NMR}$  (150 MHz,  $\text{CDCl}_3$ )  $\delta$  150.8, 141.6, 137.1, 130.0, 129.9, 129.2, 129.0, 128.6, 128.5, 127.9, 126.8, 126.5, 119.4, 115.9, 47.3, 20.6, 20.4.

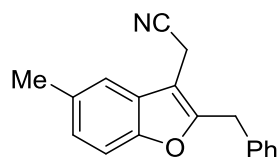

**6a**

**2-(2-benzyl-5-methylbenzofuran-3-yl)acetonitrile:** pale yellow gum

$^1\text{H NMR}$  (500 MHz,  $\text{CDCl}_3$ )  $\delta$  7.35 – 7.28 (m, 4H), 7.26 – 7.22 (m, 3H), 7.09 (dd,  $J = 8.5, 1.0$  Hz, 1H), 4.14 (s, 2H), 3.60 (s, 2H), 2.45 (s, 3H).

$^{13}\text{C NMR}$  (150 MHz,  $\text{CDCl}_3$ )  $\delta$  154.1, 152.3, 136.4, 132.6, 128.8, 128.5, 127.6, 125.3, 120.6, 118.3, 110.8, 104.5, 32.8, 21.3, 12.6.

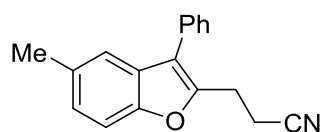

**6b**

**3-(5-methyl-3-phenylbenzofuran-2-yl)propanenitrile:** pale yellow gum

$^1\text{H NMR}$  (500 MHz,  $\text{CDCl}_3$ )  $\delta$  7.34 – 7.28 (m, 4H), 7.27 – 7.21 (m, 2H), 7.06 (dd,  $J = 8.5, 1.0$  Hz, 1H), 6.48 (s, 1H), 3.11 (t,  $J = 7.5$  Hz, 2H), 2.76 (t,  $J = 7.5$  Hz, 2H), 2.42 (s, 3H).

$^{13}\text{C NMR}$  (150 MHz,  $\text{CDCl}_3$ )  $\delta$  154.1, 153.2, 136.4, 132.3, 128.3, 126.9, 125.7, 118.5, 116.8, 110.4, 103.6, 24.8, 21.2, 16.2.

# VI. $^1\text{H}$ and $^{13}\text{C}$ NMR

## 2a- $^1\text{H}$ NMR

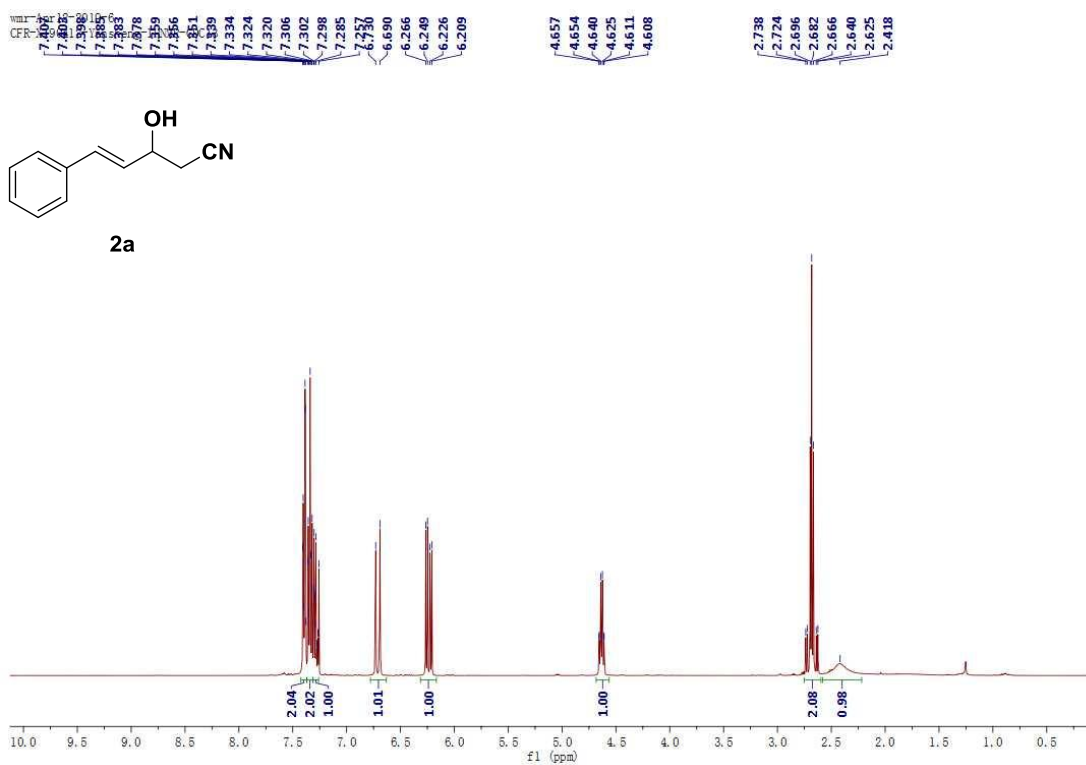

## 2a- $^{13}\text{C}$ NMR

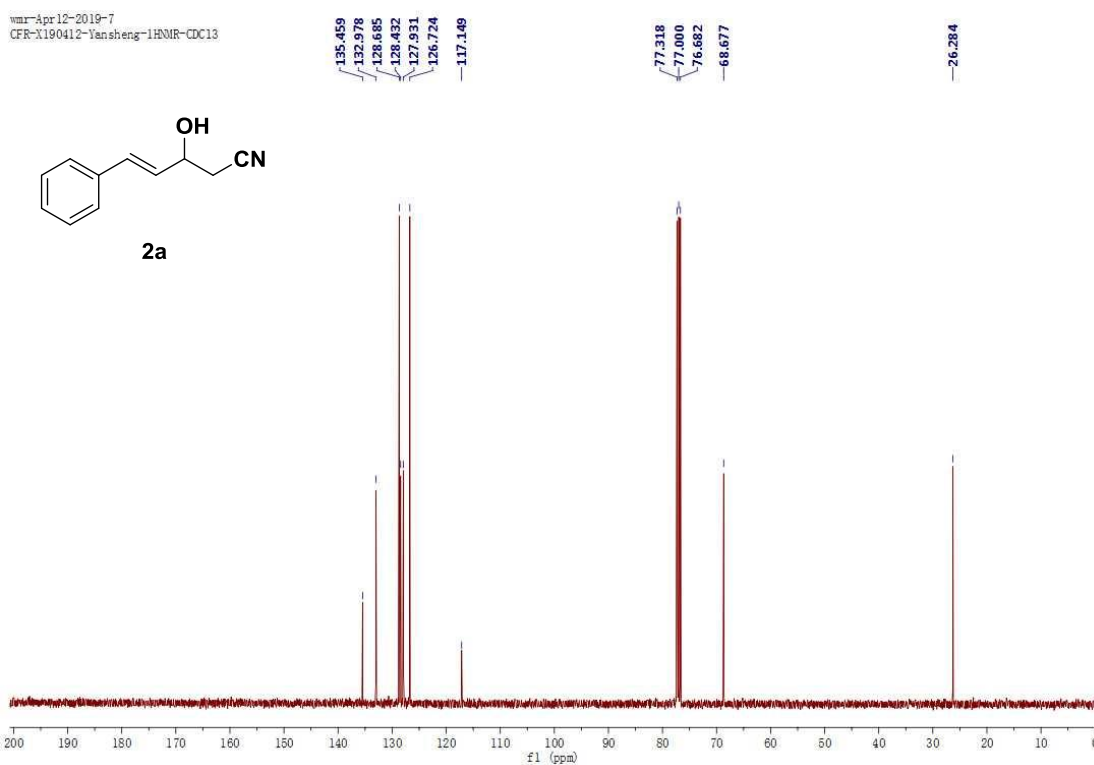

## 2b-<sup>1</sup>H NMR

wmr-Apr01-2019-6  
CFR-65-1HNMR-CDC13

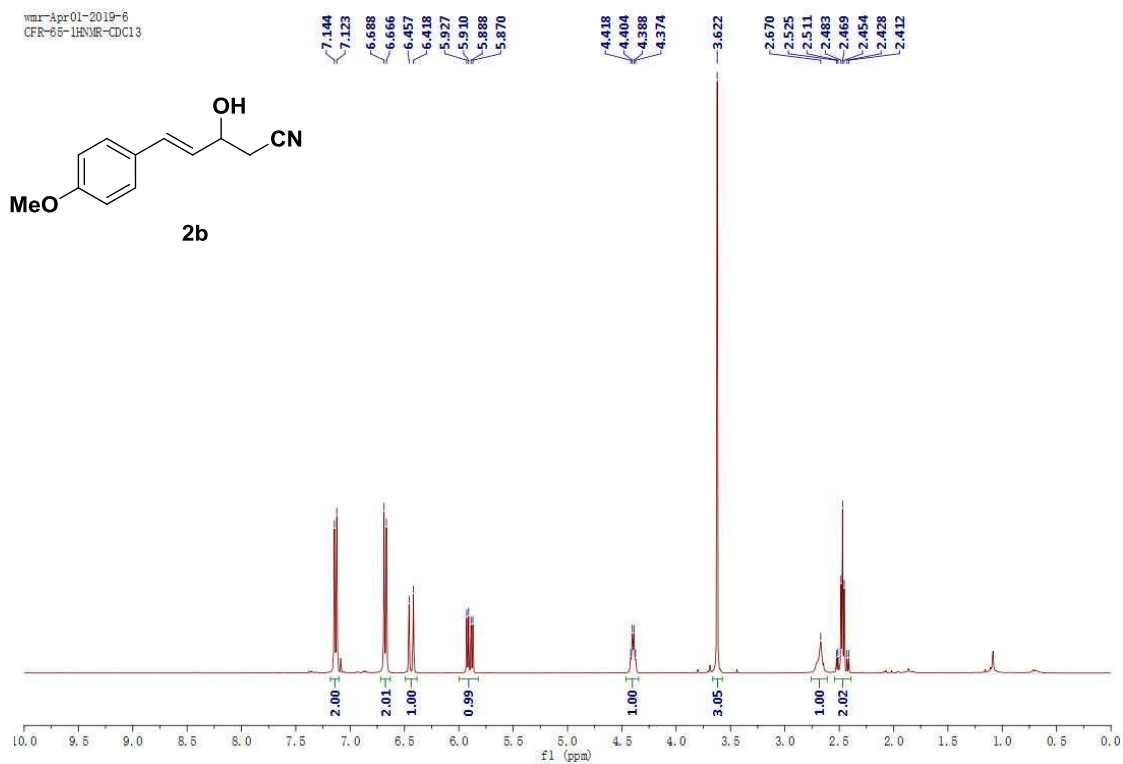

## 2b-<sup>13</sup>C NMR

wmr-Apr01-2019-6  
CFR-65-13CNMR-CDC13

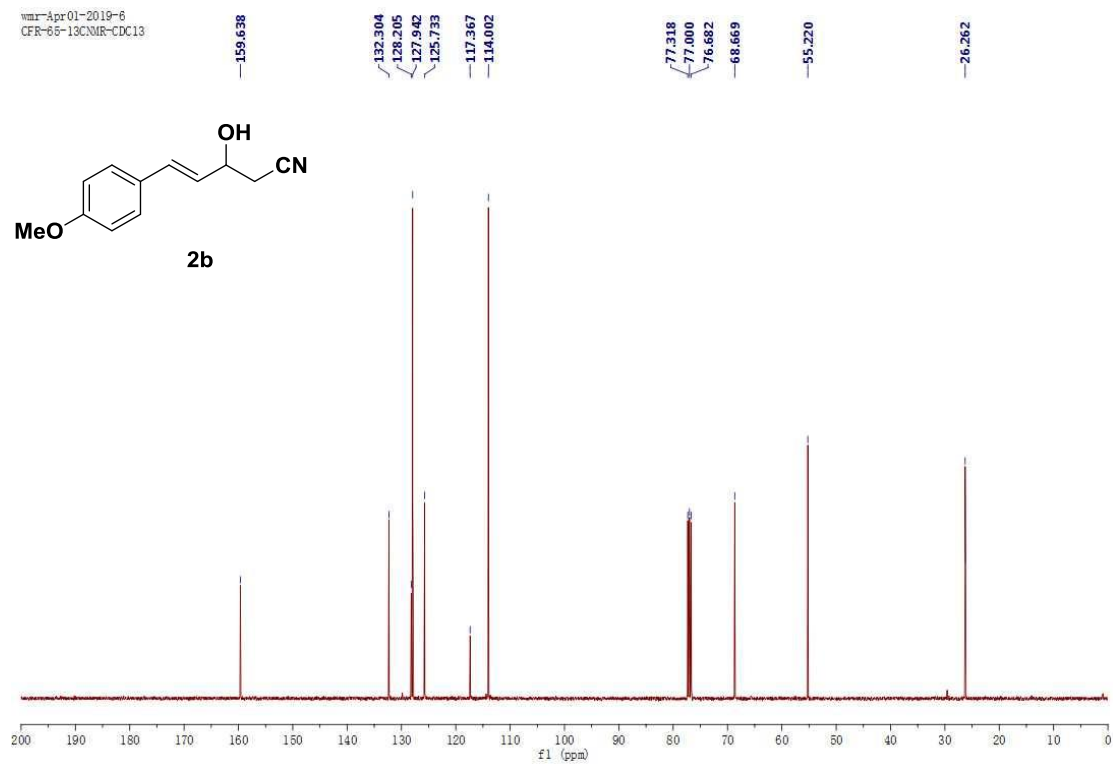

## 2c-<sup>1</sup>H NMR

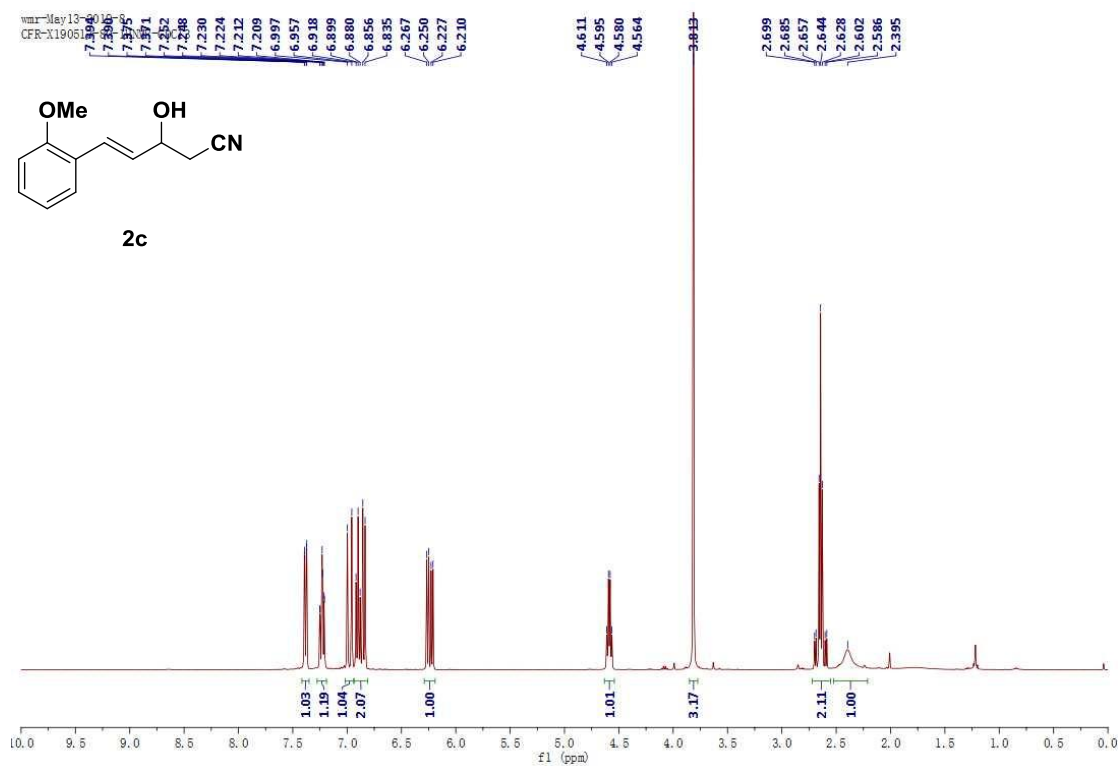

## 2c-<sup>13</sup>C NMR

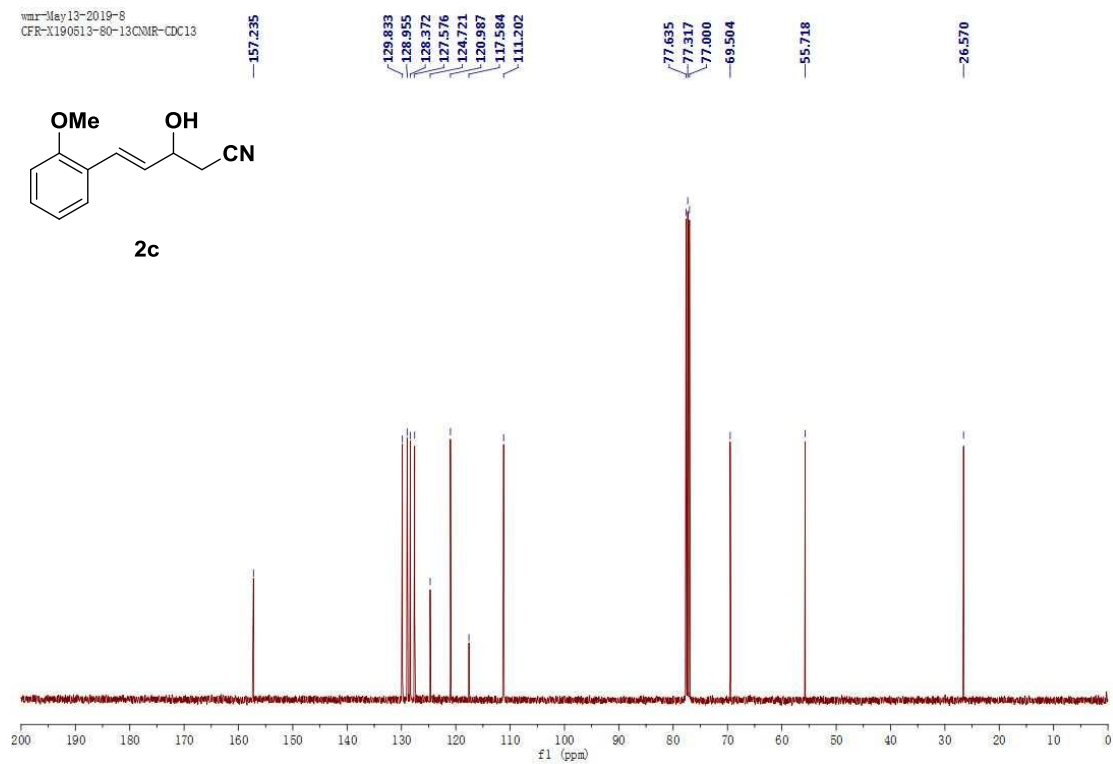

## 2d-<sup>1</sup>H NMR

war-Jun17-2019-5  
CFR-X190617-99-2-1HNMR-CDC13

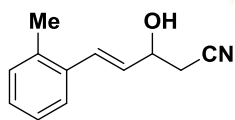

2d

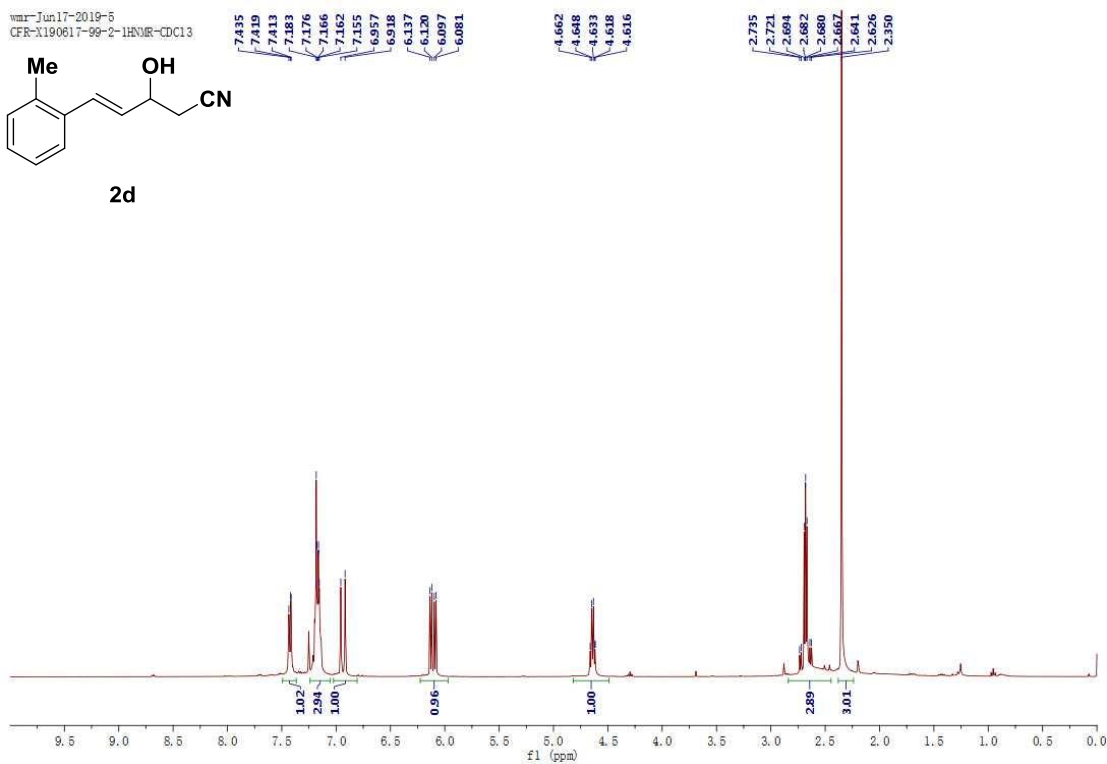

## 2d-<sup>13</sup>C NMR

war-Aug06-2019-1  
CFR-X190806-85-3-13CNMR-CDC13

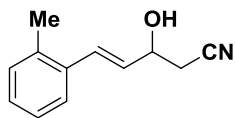

2d

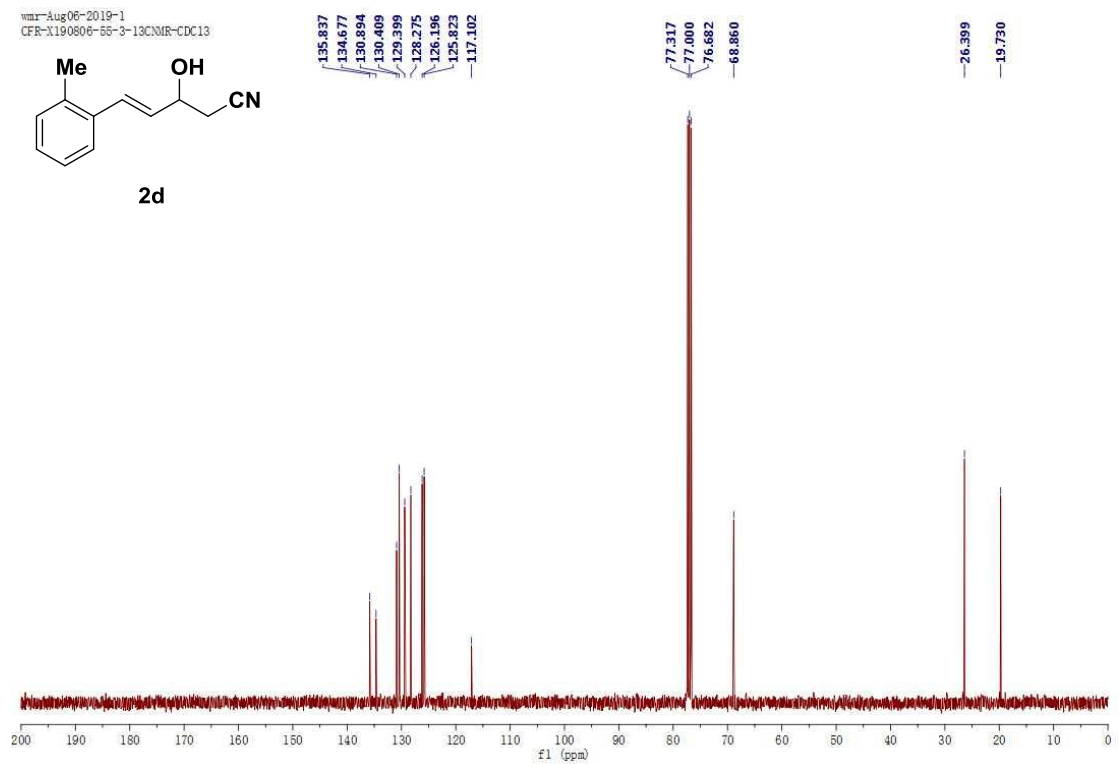



## 2e-<sup>1</sup>H NMR

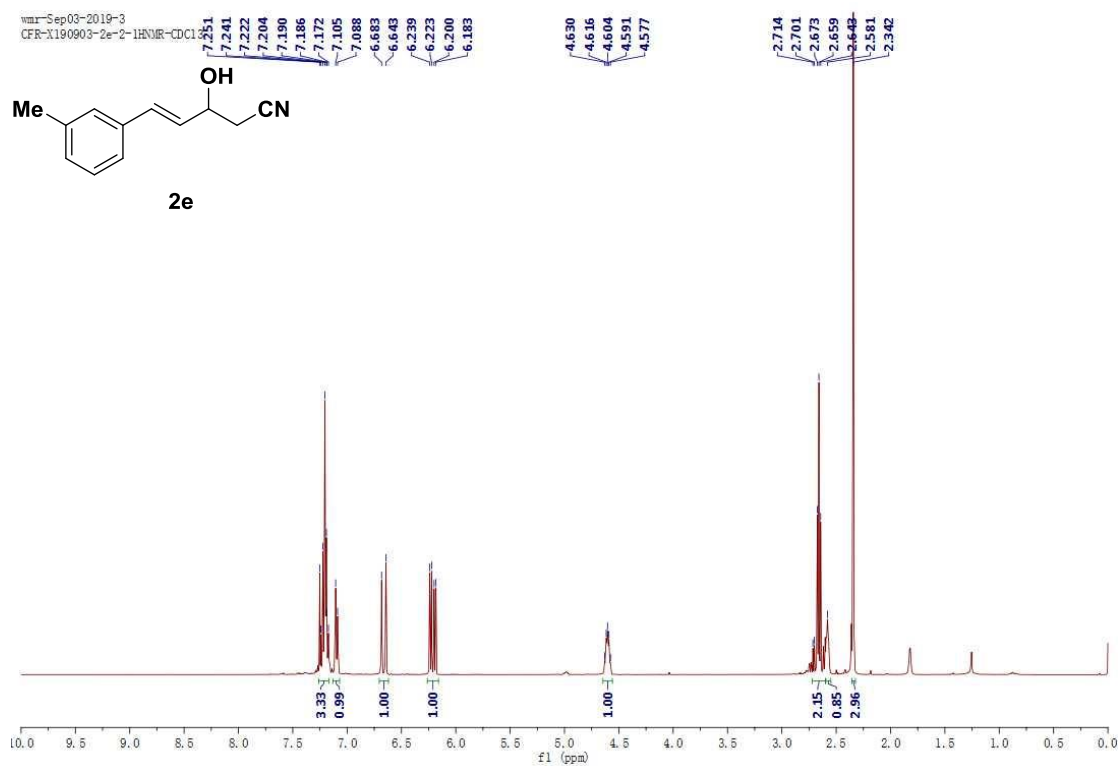

## 2e-<sup>13</sup>C NMR

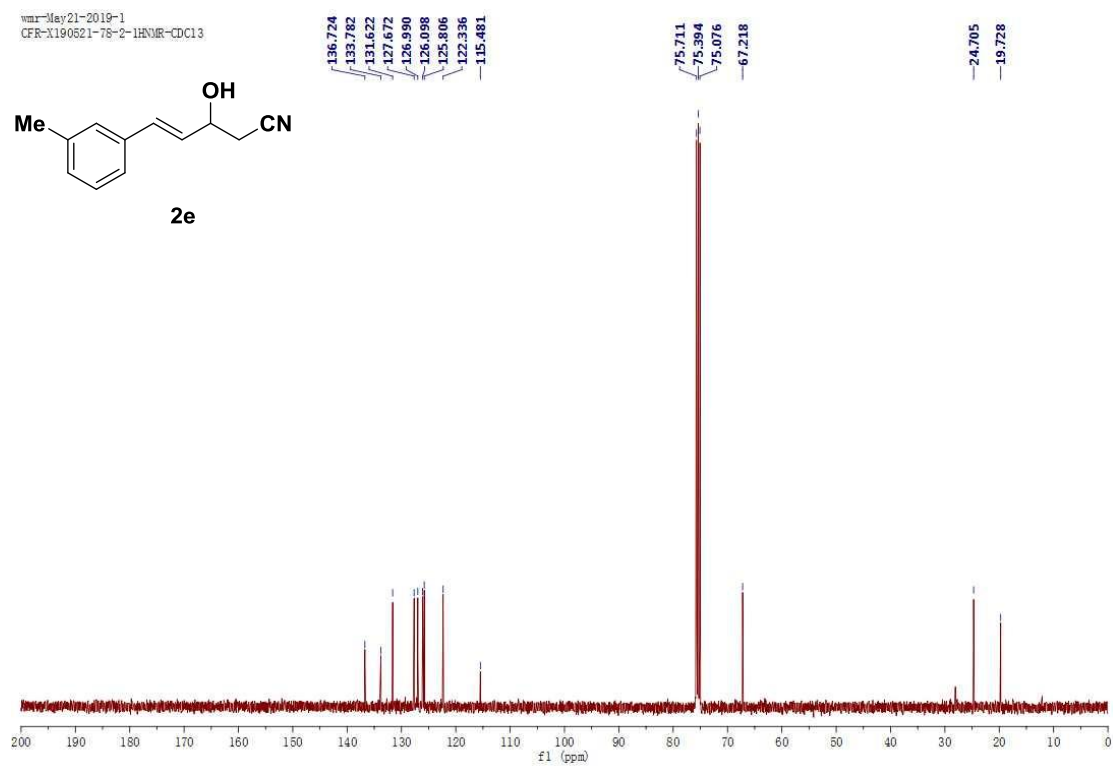

## 2f-<sup>1</sup>H NMR

wmr-Aug07-2019-9  
CFR-X190807-1-<sup>1</sup>H NMR-CDCl<sub>3</sub>

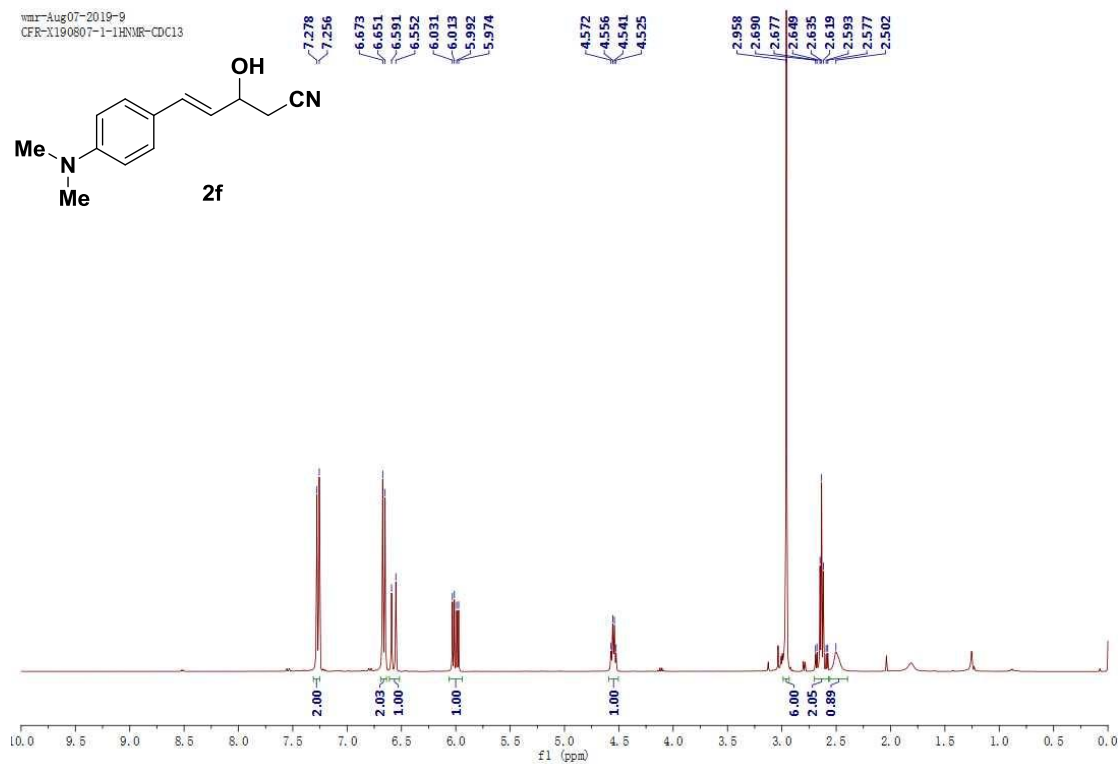

## 2f-<sup>13</sup>C NMR

wmr-Aug07-2019-10  
CFR-X190807-1-<sup>13</sup>C NMR-CDCl<sub>3</sub>

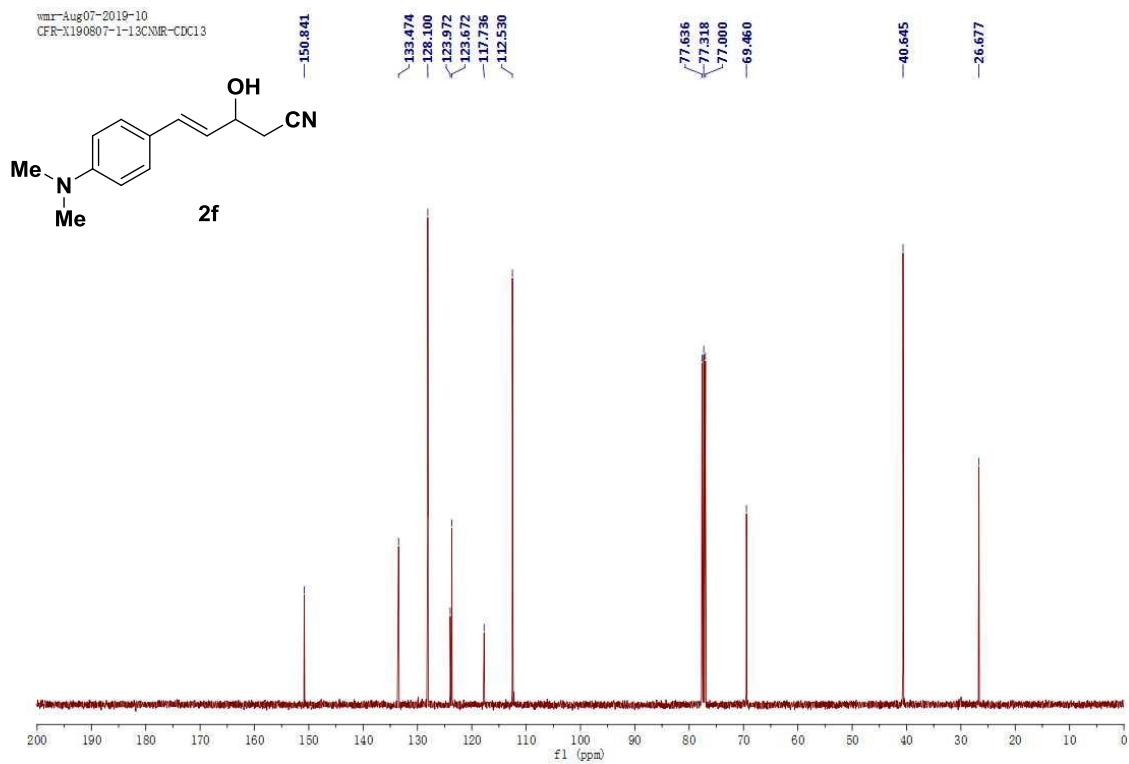

## 2g-<sup>1</sup>H NMR

wmr-Sep03-2019-2  
CFR-X190903-2g-2-<sup>1</sup>H NMR-CD

7.562  
7.349  
7.340  
7.332  
7.327  
7.031  
7.010  
6.995  
6.988  
6.981  
6.680  
6.640  
6.168  
6.151  
6.128  
6.112  
4.639  
4.625  
4.512  
4.599  
4.584  
2.857  
2.728  
2.715  
2.687  
2.673  
2.670  
2.654  
2.628  
2.613

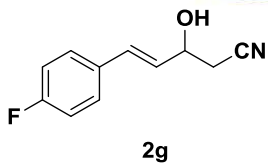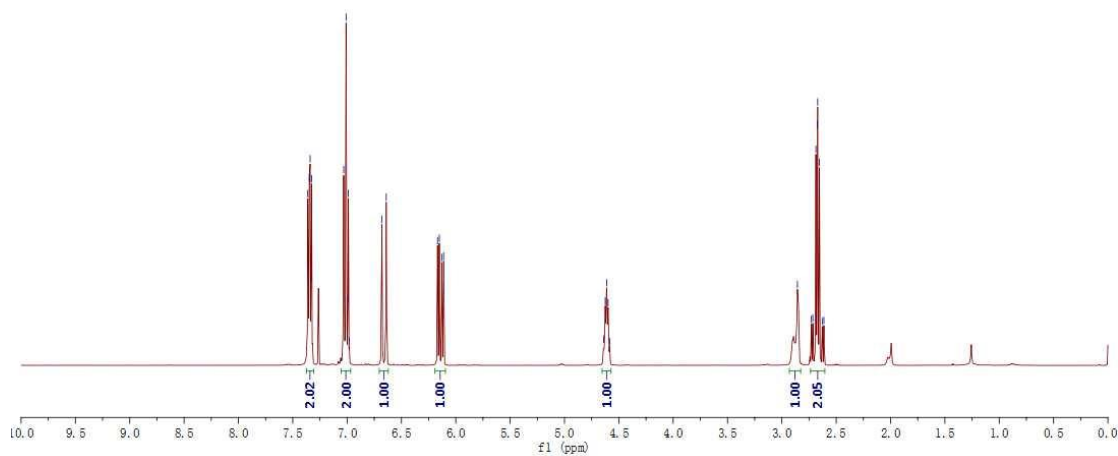

## 2g-<sup>13</sup>C NMR

wmr-Sep03-2019-2  
CFR-X190903-2g-2-<sup>13</sup>C NMR-CDC13

163.889  
161.404  
131.710  
131.677  
131.591  
128.337  
128.257  
127.723  
127.702  
117.250  
115.698  
115.482  
77.318  
77.000  
76.682  
68.402  
26.271

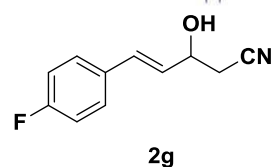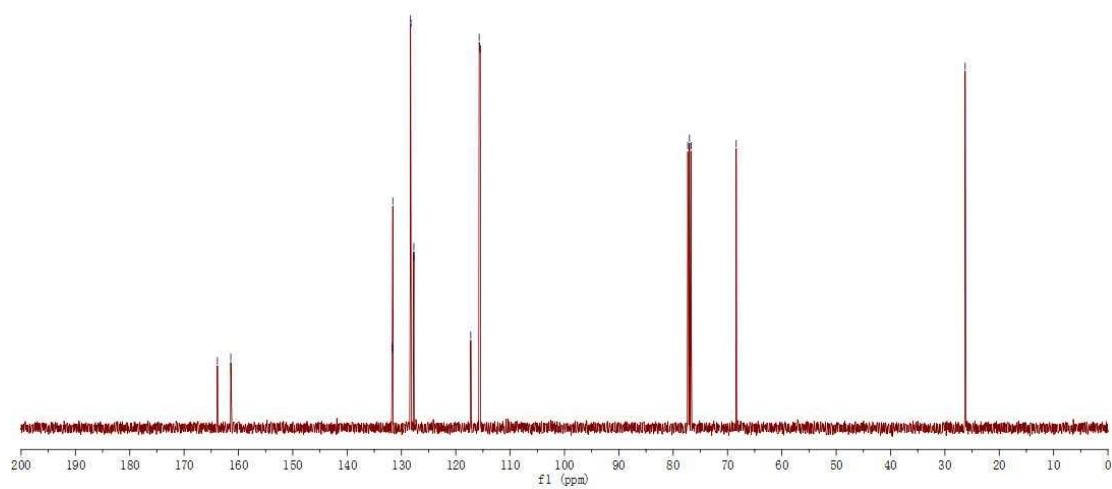

2g-<sup>19</sup>F NMR

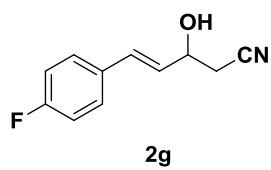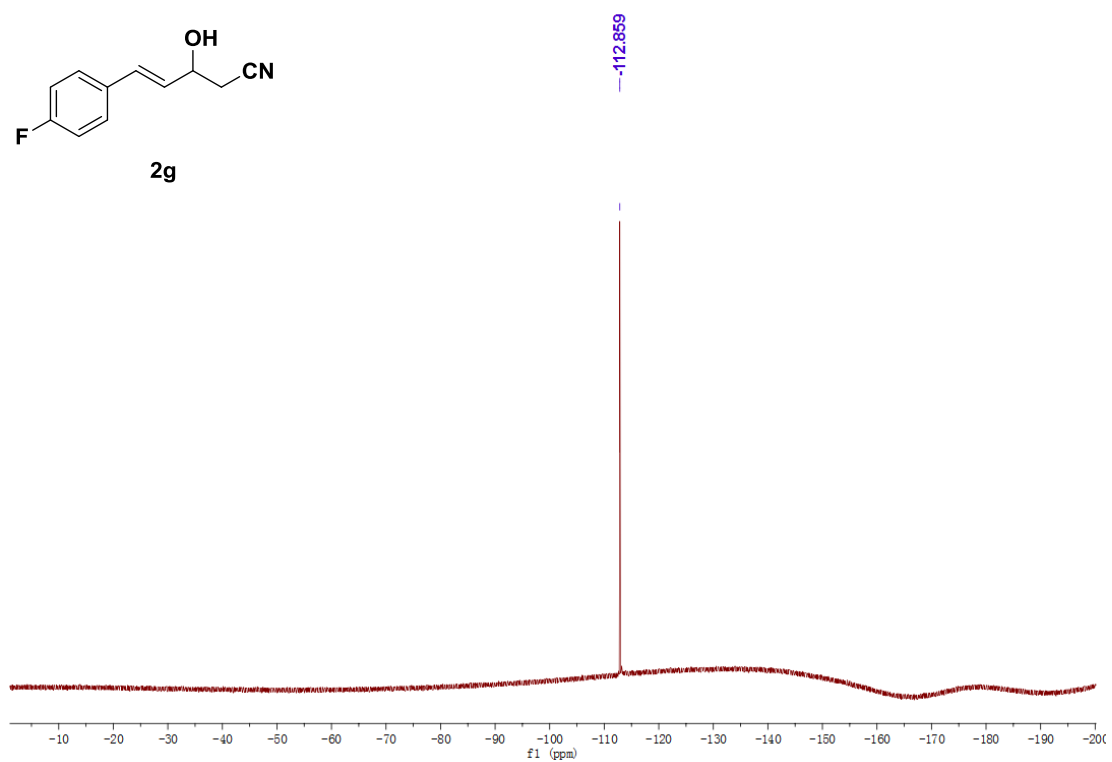



## 2h-<sup>19</sup>F NMR

wmr-Jun10-2019-5  
CFR-X190610-90-19FMR-CDC13

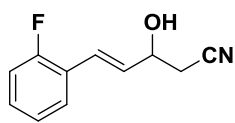

2h

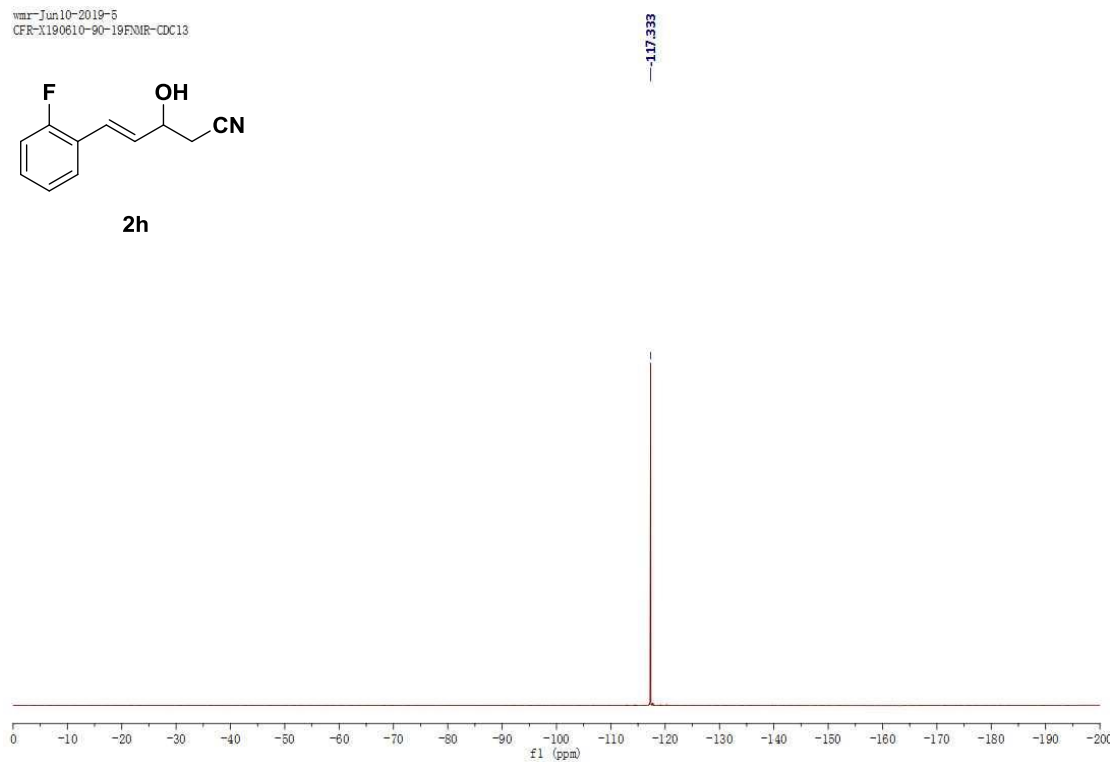

## 2i-<sup>1</sup>H NMR

wmr-May31-2019-4  
CYZ-Y190631-88-1HNMR-CDCl3

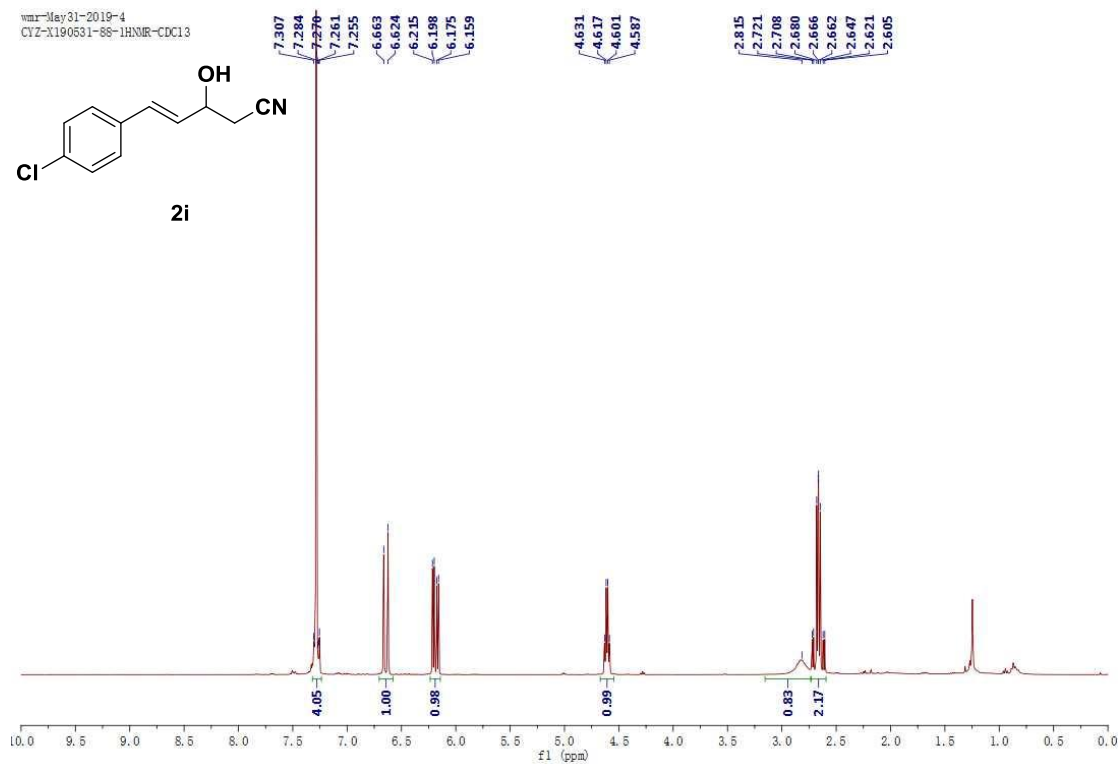

## 2i-<sup>13</sup>C NMR

wmr-Jun03-2019-4  
CFR-88-13CNMR-CDCL3

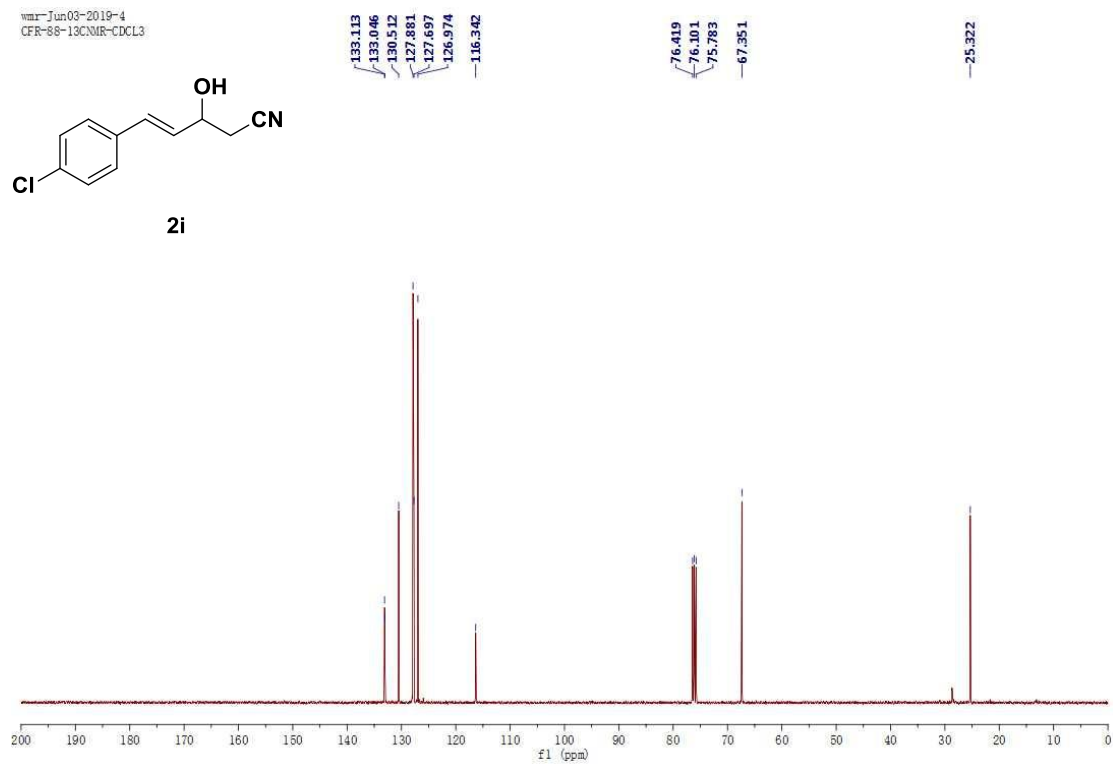

## 2j-<sup>1</sup>H NMR

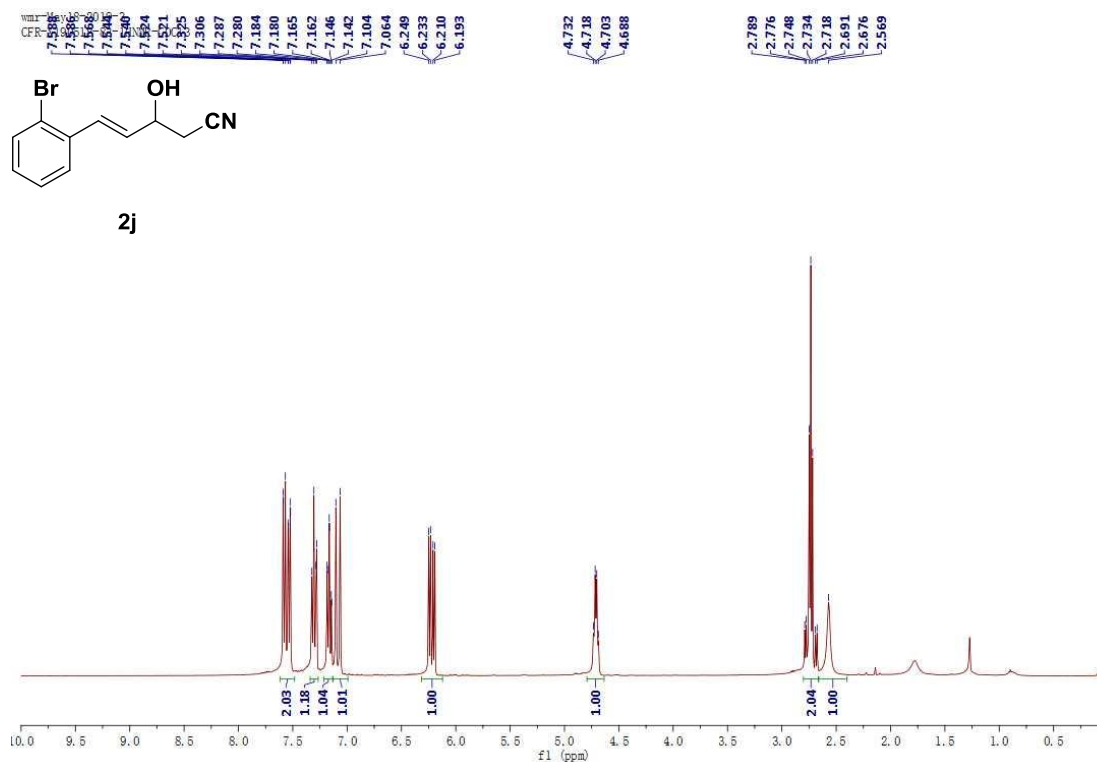

## 2j-<sup>13</sup>C NMR

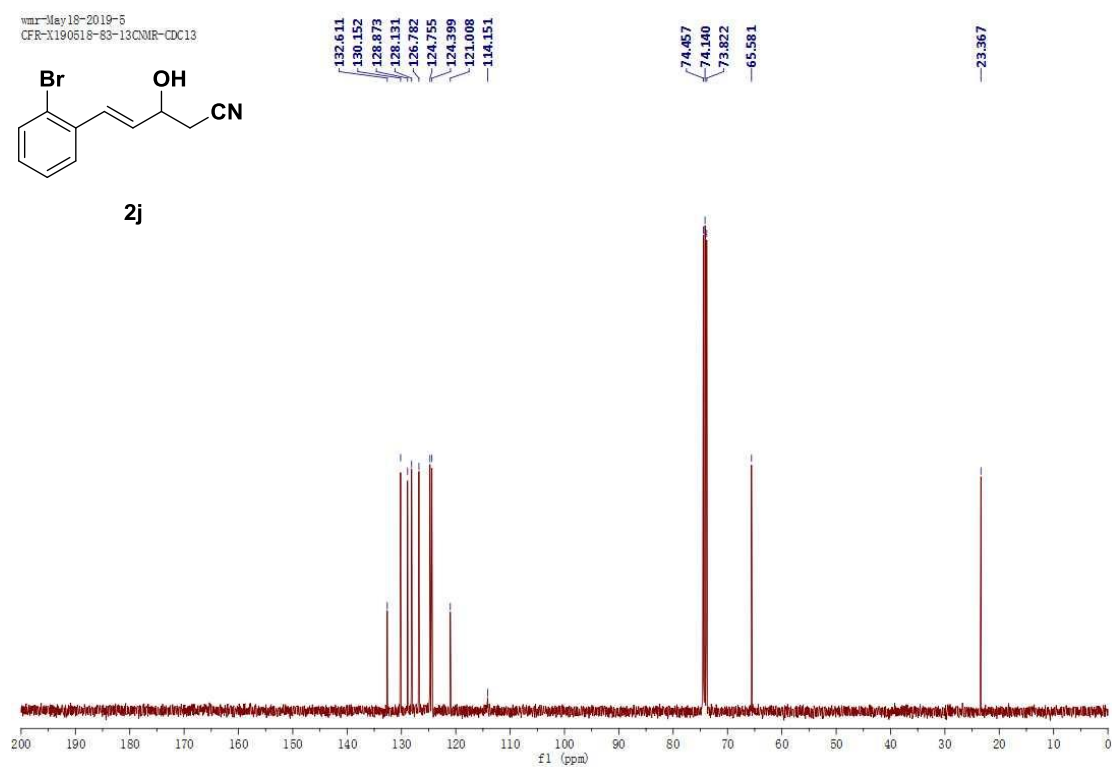



## 2k-<sup>1</sup>H NMR

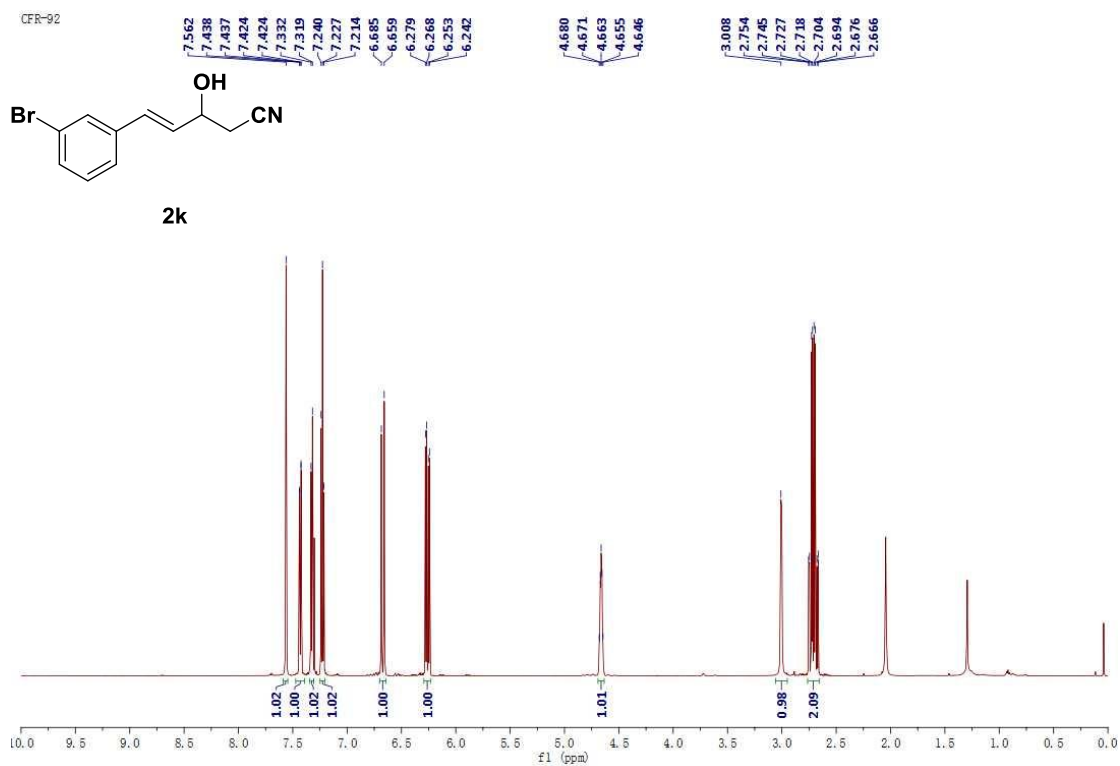

## 2k-<sup>13</sup>C NMR

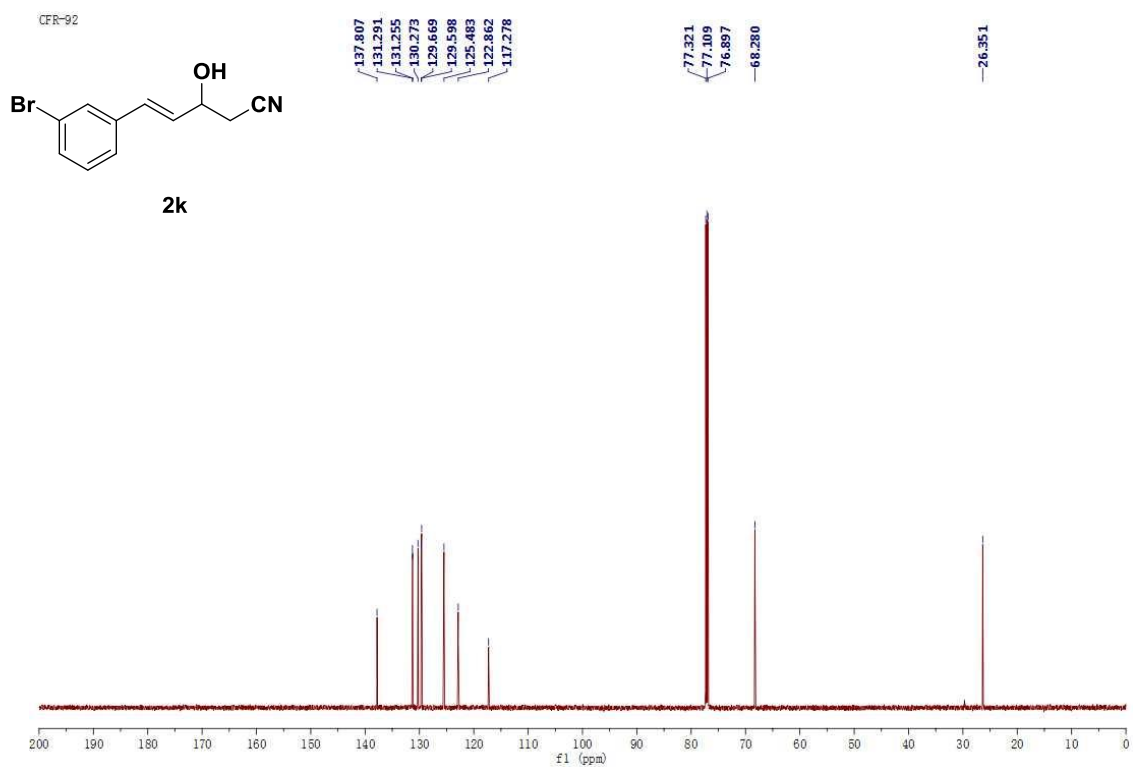

## 2I-<sup>1</sup>H NMR

wmr-Mar25-2019-11  
CFR-X190325-60-1HNMR-CDCl3

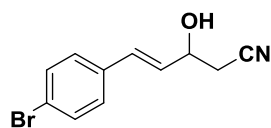

2I

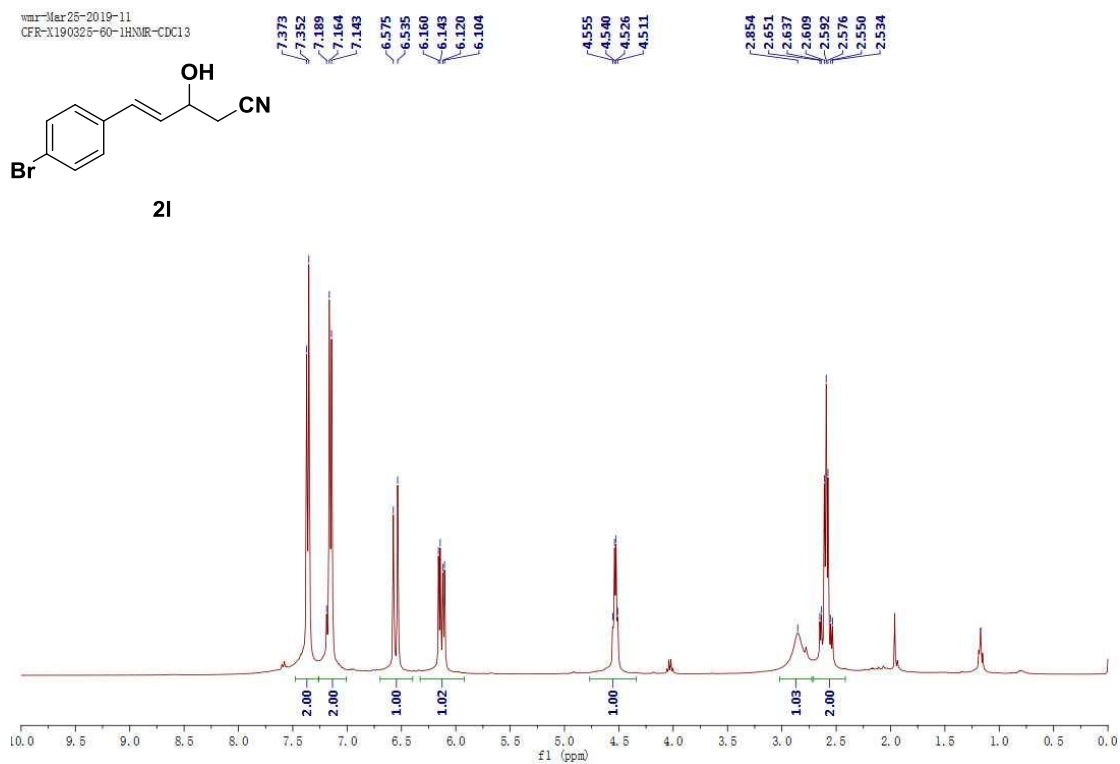

## 2I-<sup>13</sup>C NMR

wmr-Mar25-2019-11  
CFR-X190325-60-1HNMR-CDCl3

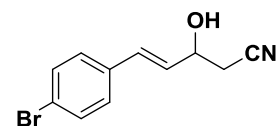

2I

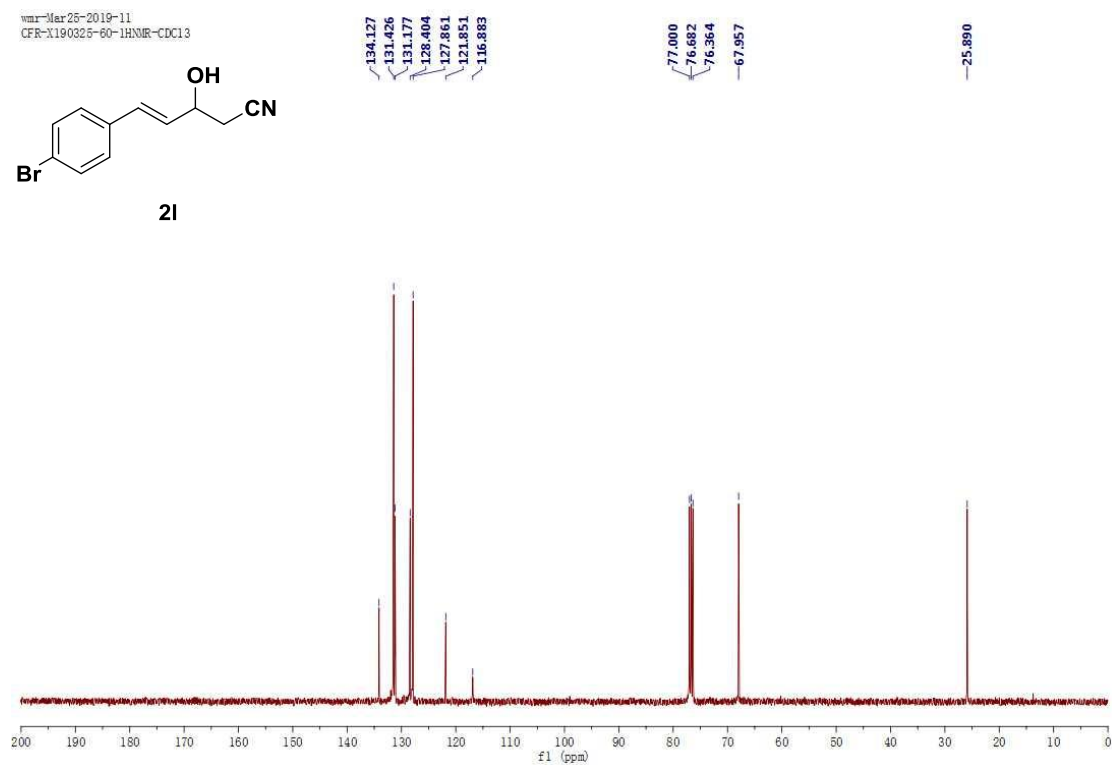

## 2m-<sup>1</sup>H NMR

wmr-Sep10-2019-7  
CFR-X190910-2m-3-1HNMR-CDC13

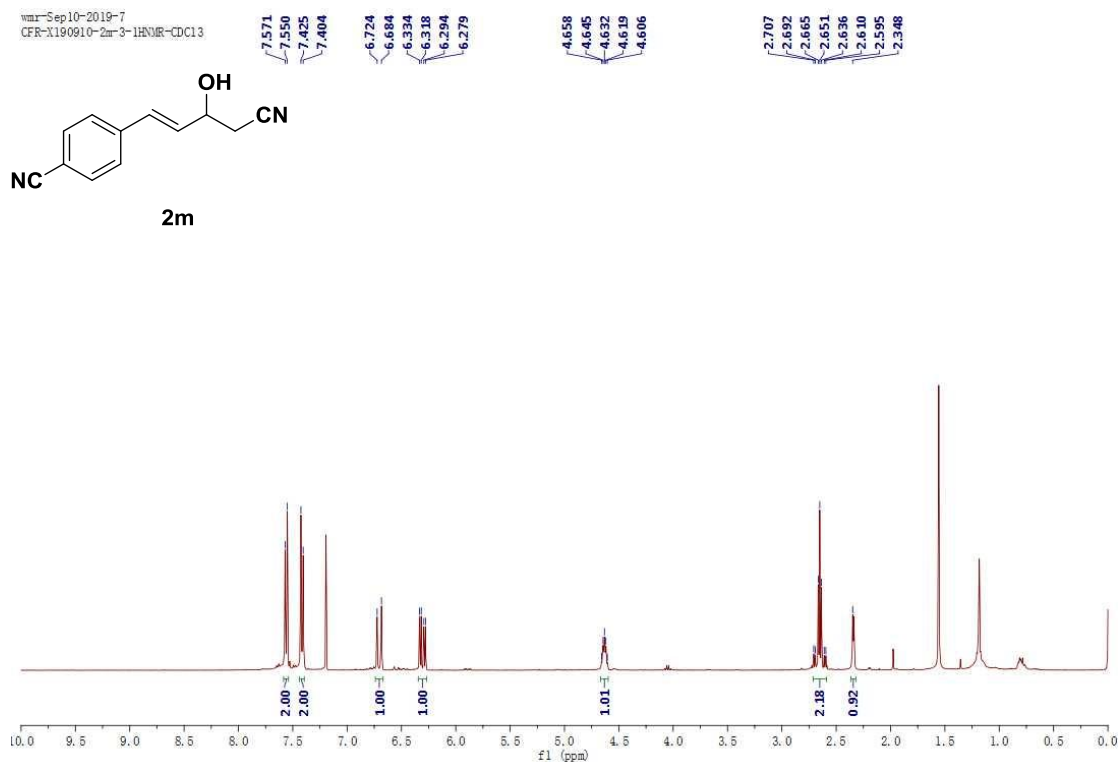

## 2m-<sup>13</sup>C NMR

wmr-Jun17-2019-3  
CFR-X190617-66-3-13CNMR-CDC13

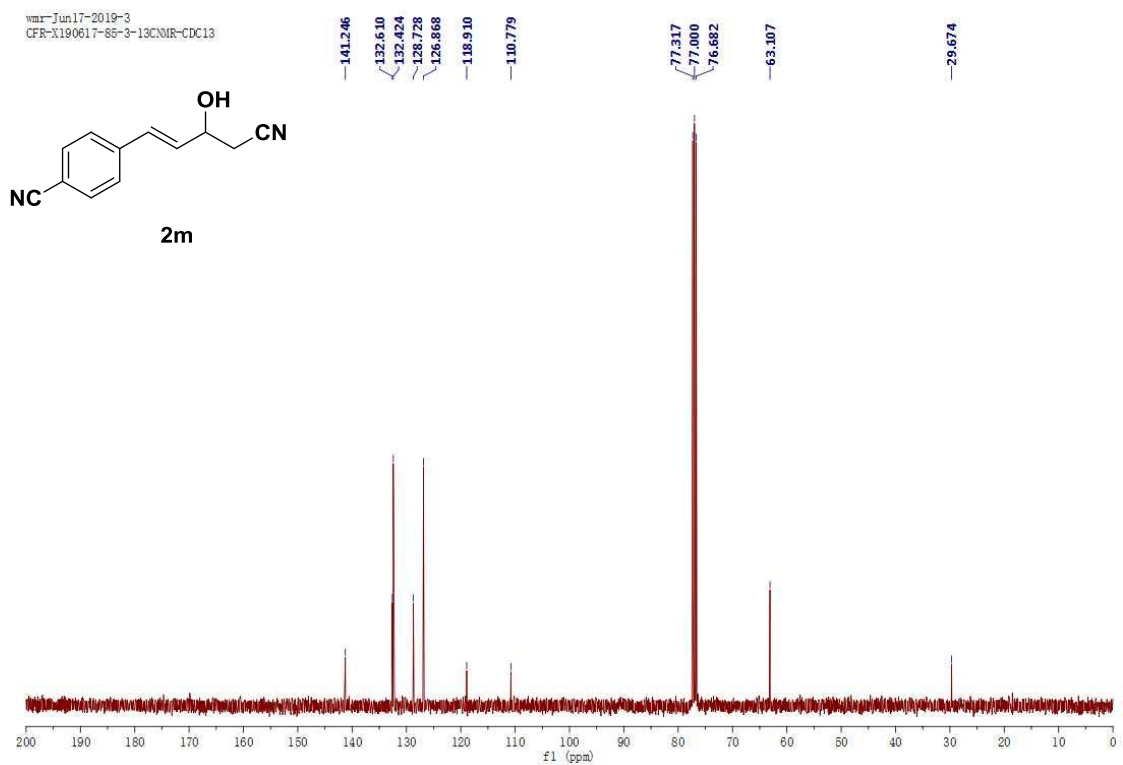

## 2n-<sup>1</sup>H NMR

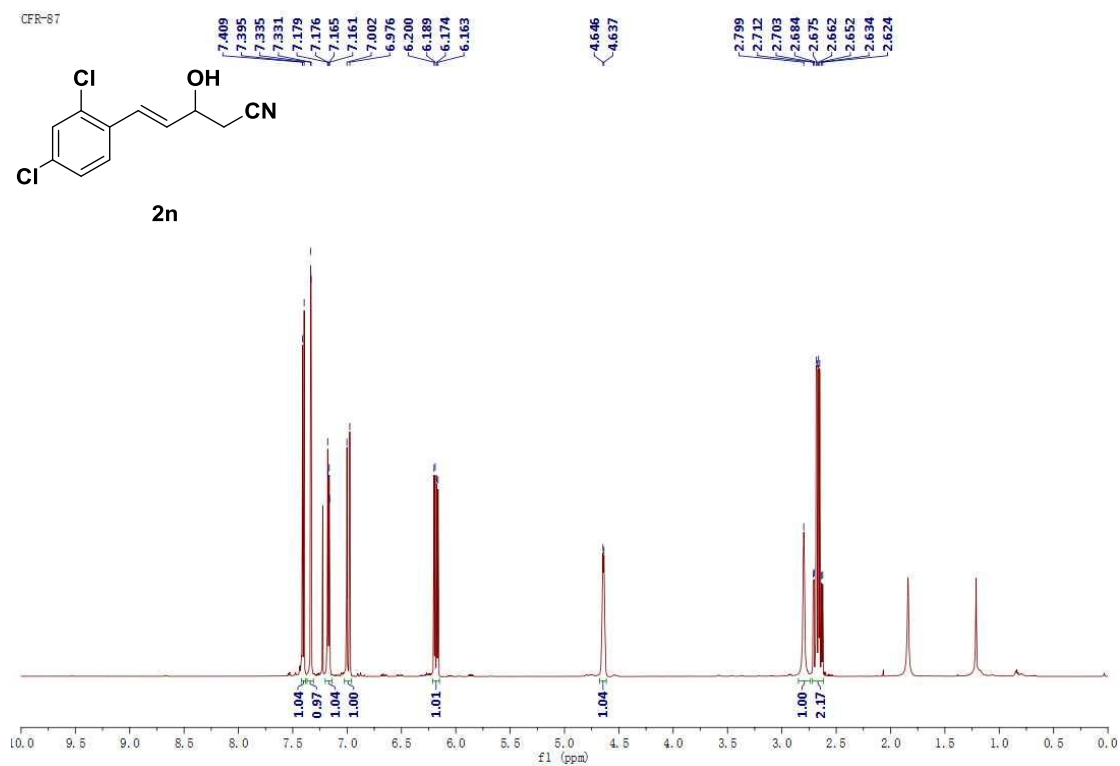

## 2n-<sup>13</sup>C NMR

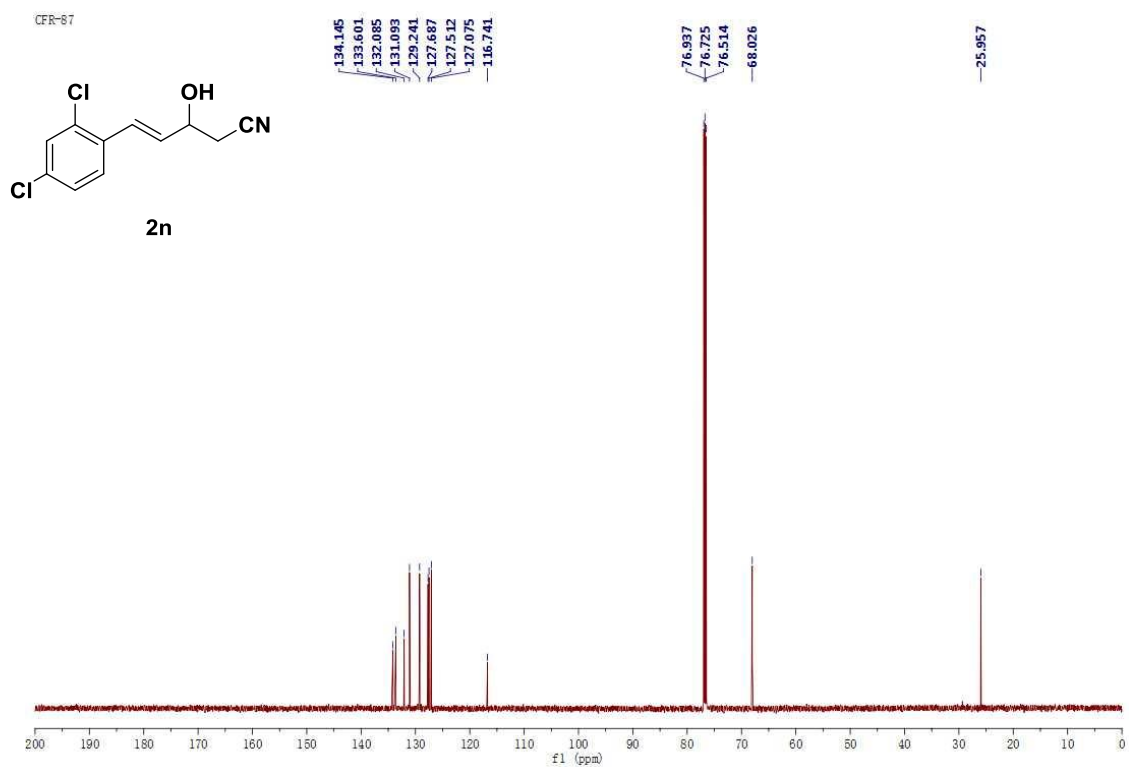

## 2o-<sup>1</sup>H NMR

wmr-Jun05-2019-1  
CFR-X190605-89-1HNMR-CDCl3

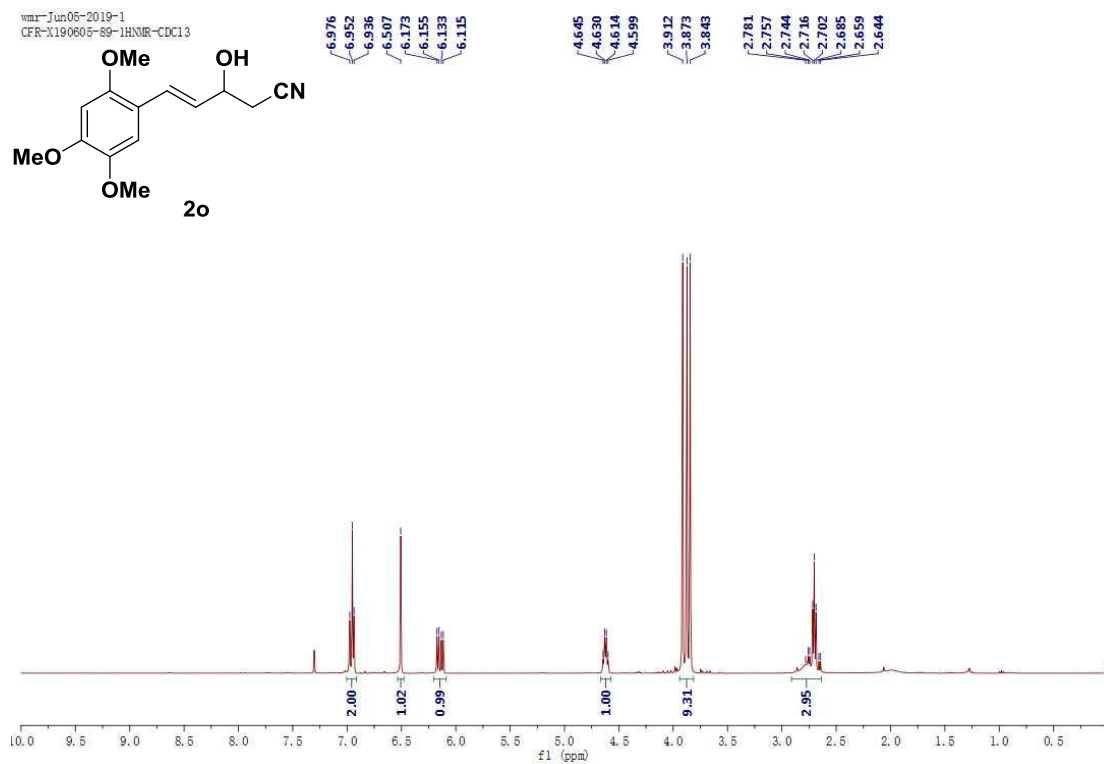

## 2o-<sup>13</sup>C NMR

wmr-Jun05-2019-2  
CFR-X190605-89-13CNMR-CDCl3

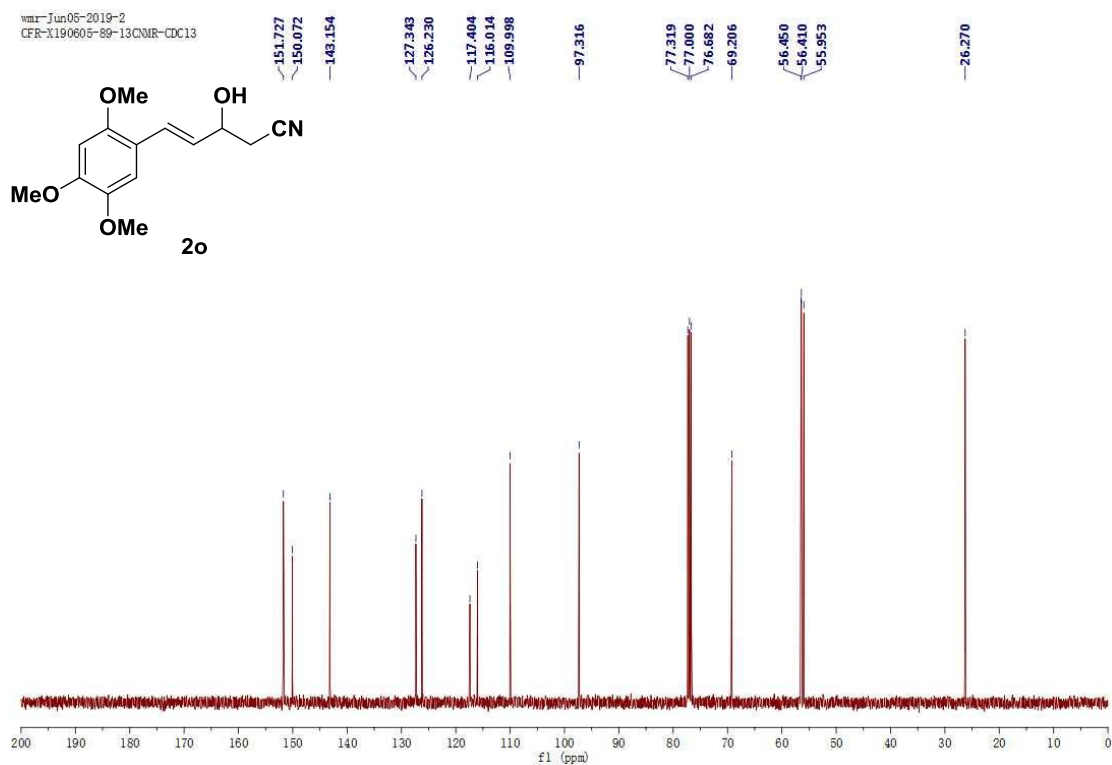

## 2p-<sup>1</sup>H NMR

wmr-May30-2019-13  
CFR-X190630-86-1HNMR-CDCl3

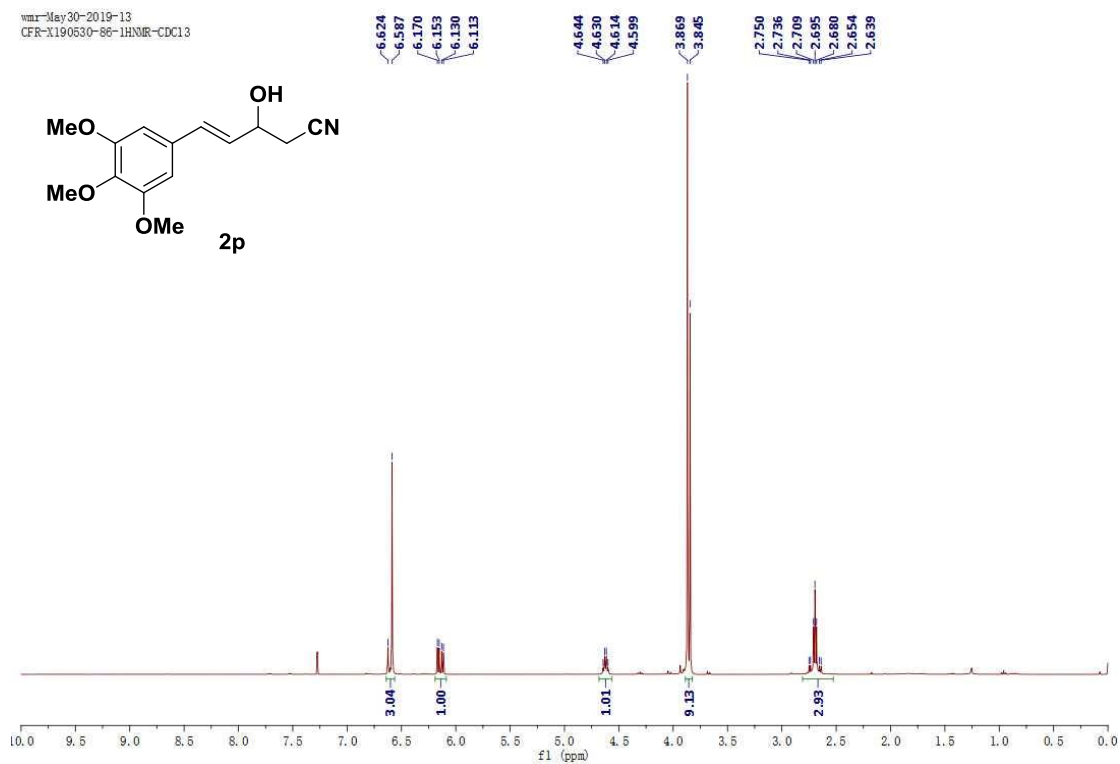

## p-<sup>13</sup>C NMR

wmr-May30-2019-16  
CFR-X190630-86-13CNMR-CDCl3

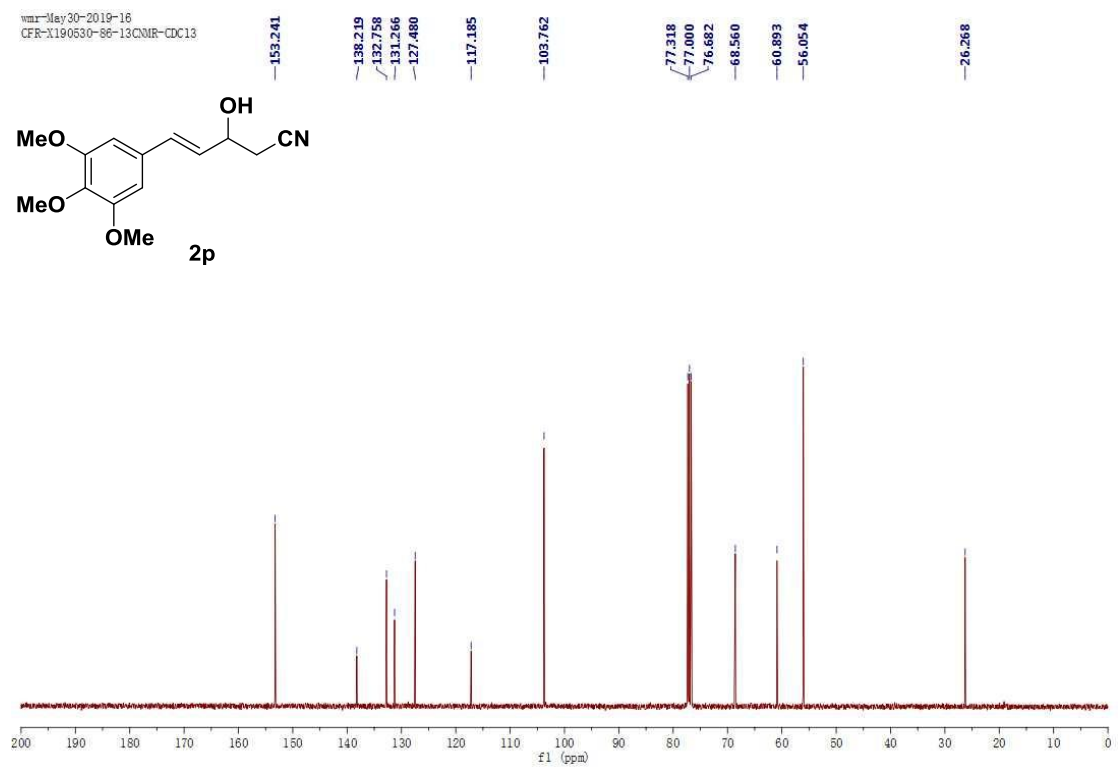

## 2q-<sup>1</sup>H NMR

wmr-Jun18-2019-3  
cfr-X190618-100-1HNMR-CDCl3

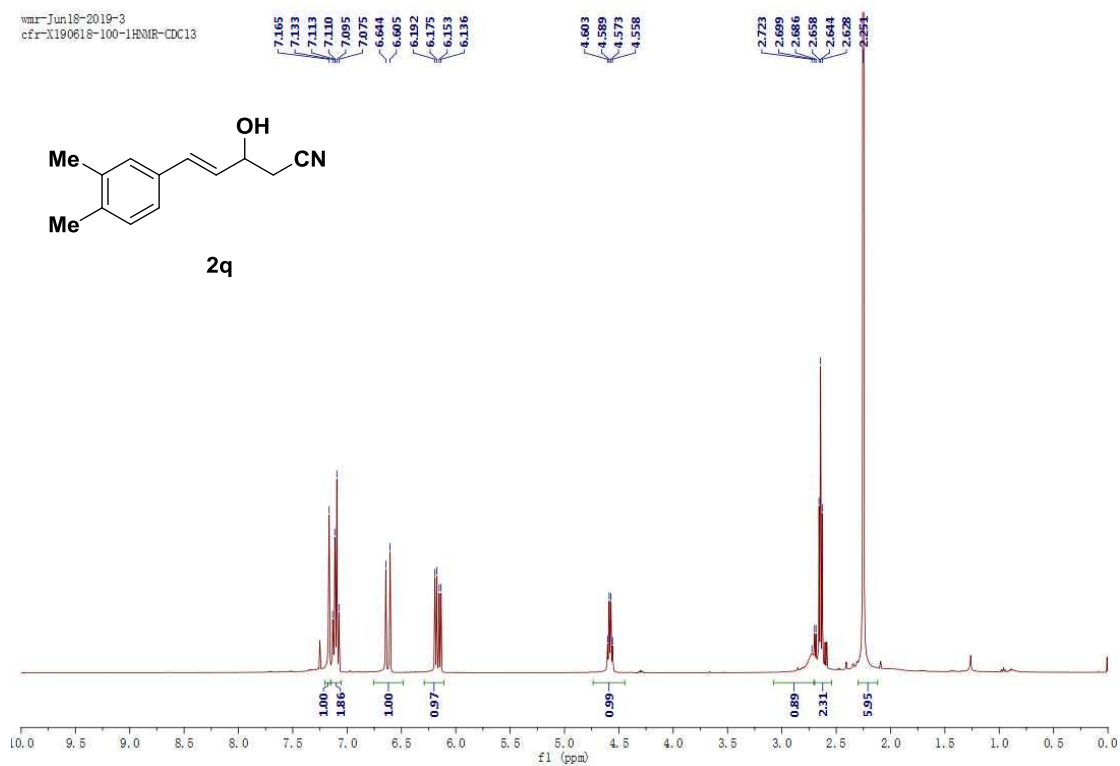

## 2q-<sup>13</sup>C NMR

wmr-Jun18-2019-16  
Cfr-X190618-100-13CNMR-CDCl3

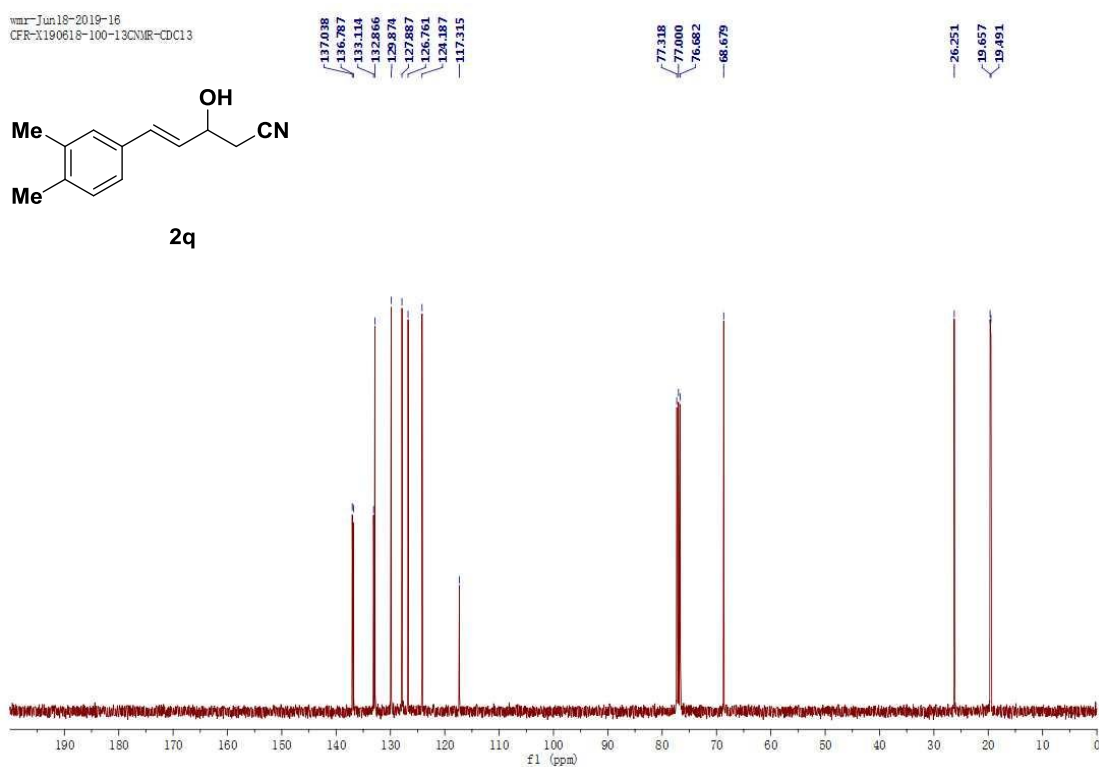

## 2r-<sup>1</sup>H NMR

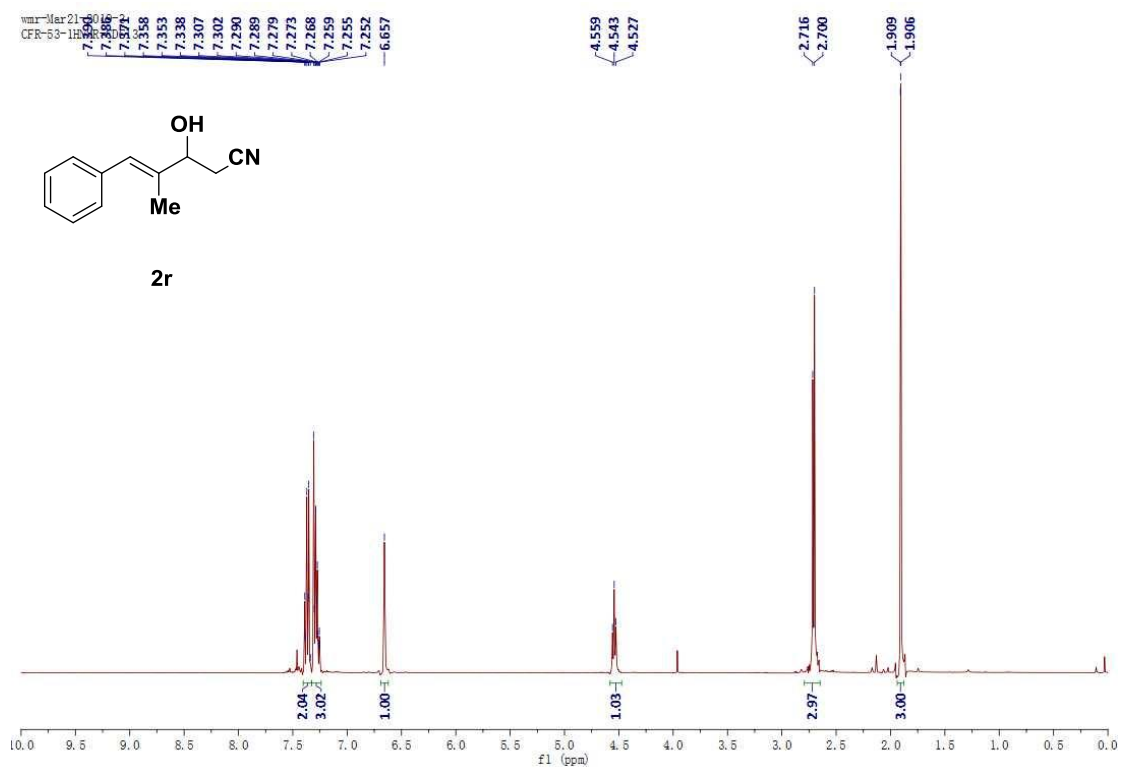

## 2r-<sup>13</sup>C NMR

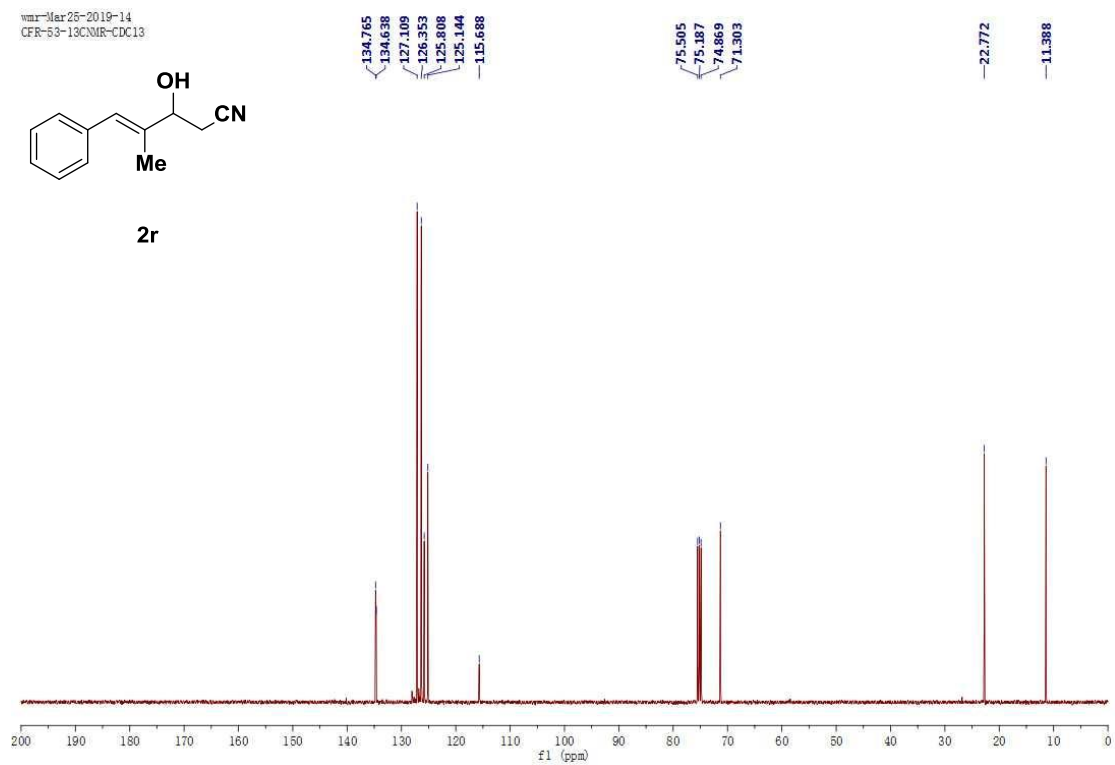



## 2s-<sup>1</sup>H NMR

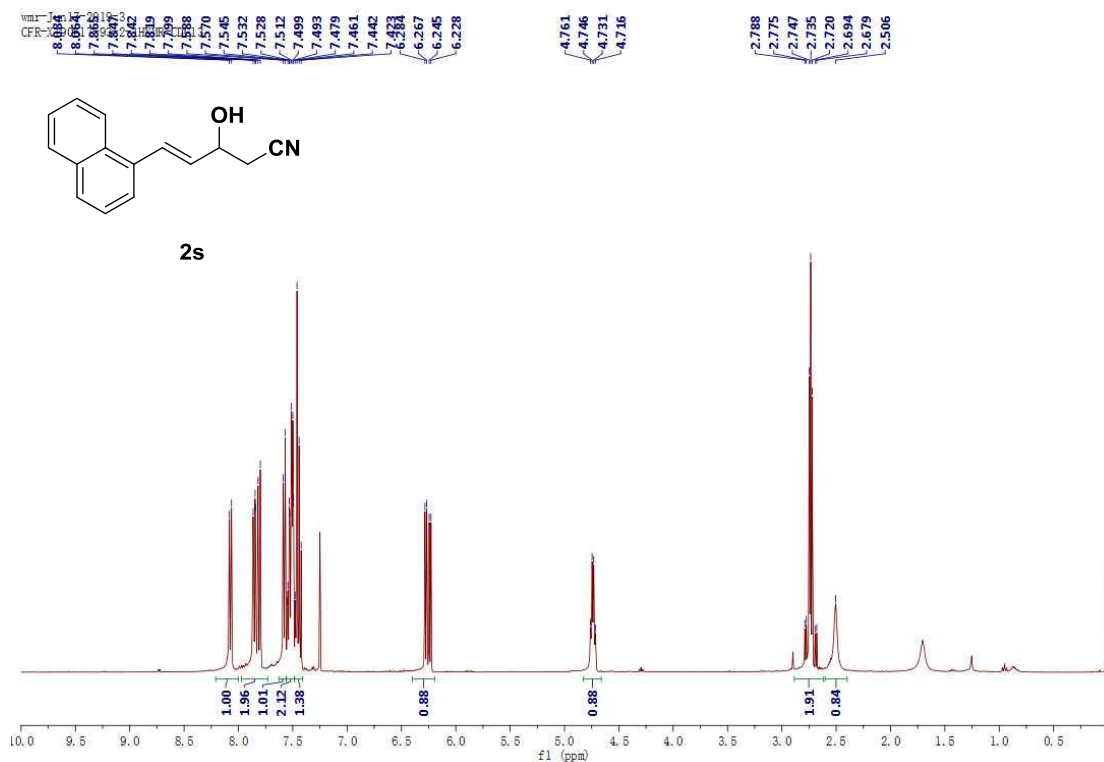

## 2s-<sup>13</sup>C NMR

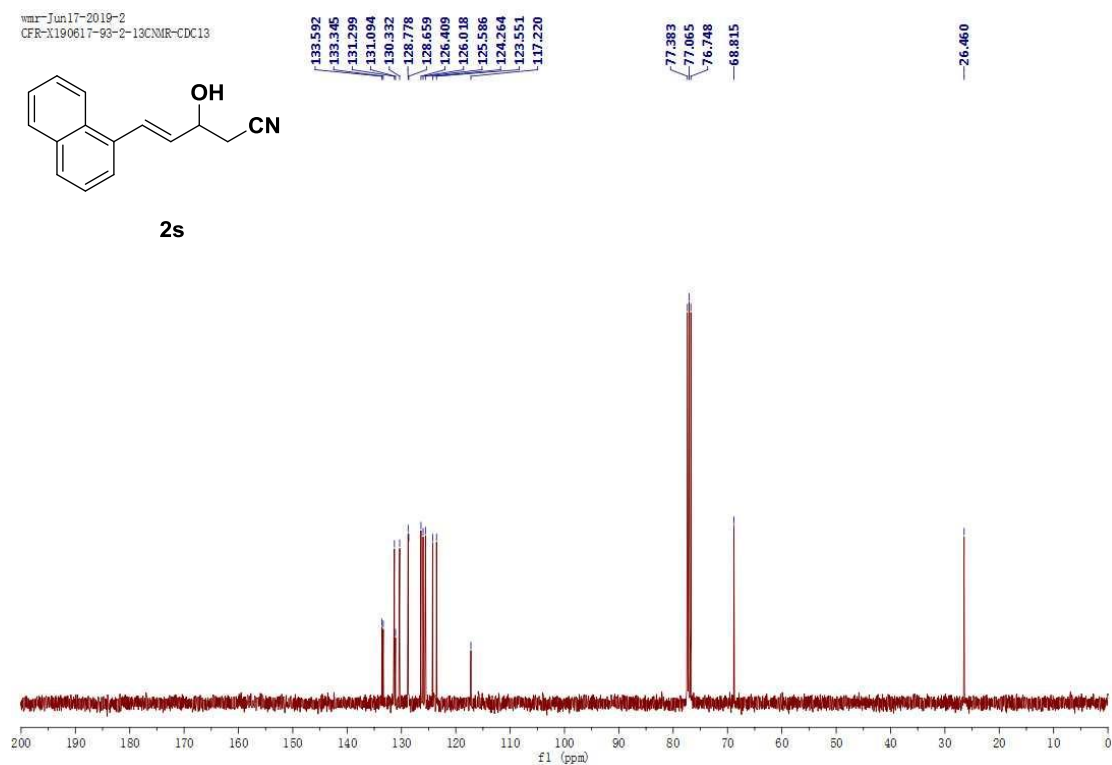

## 2t-<sup>1</sup>H NMR

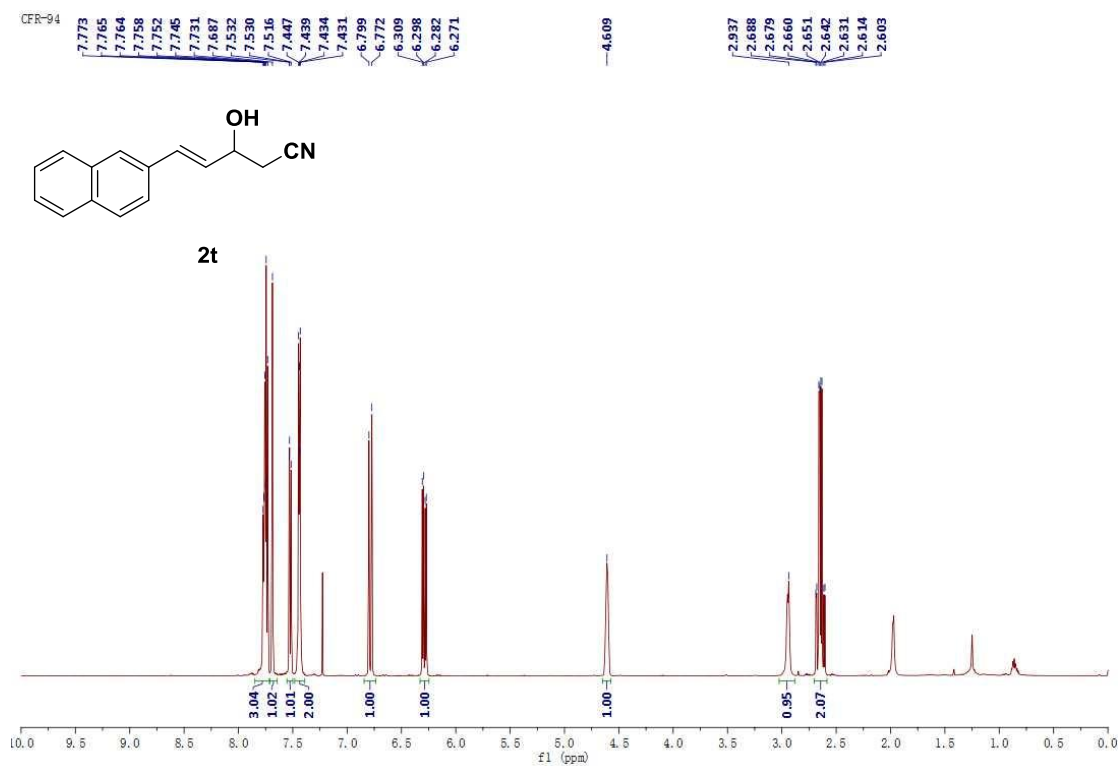

## 2t-<sup>13</sup>C NMR

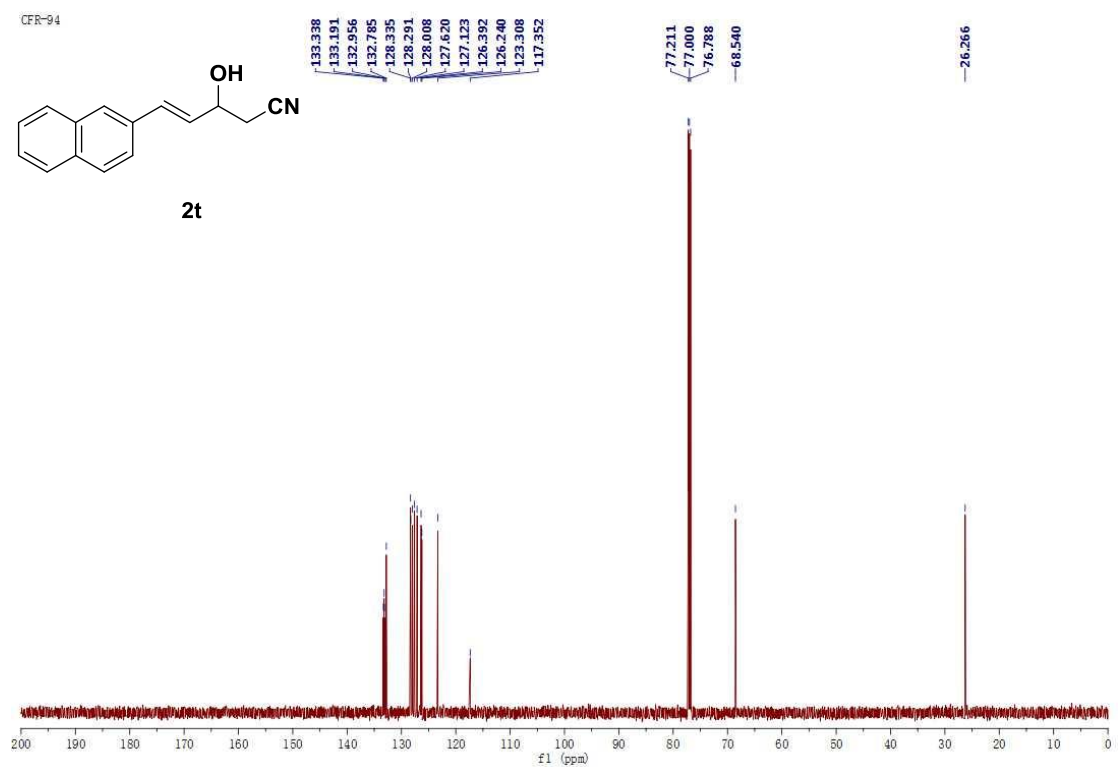

## 2u-<sup>1</sup>H NMR

war-Jun17-2019-2  
CFR-X190617-96-2-1HNMR-CDCl3

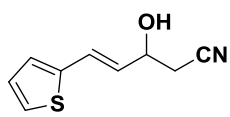

2u

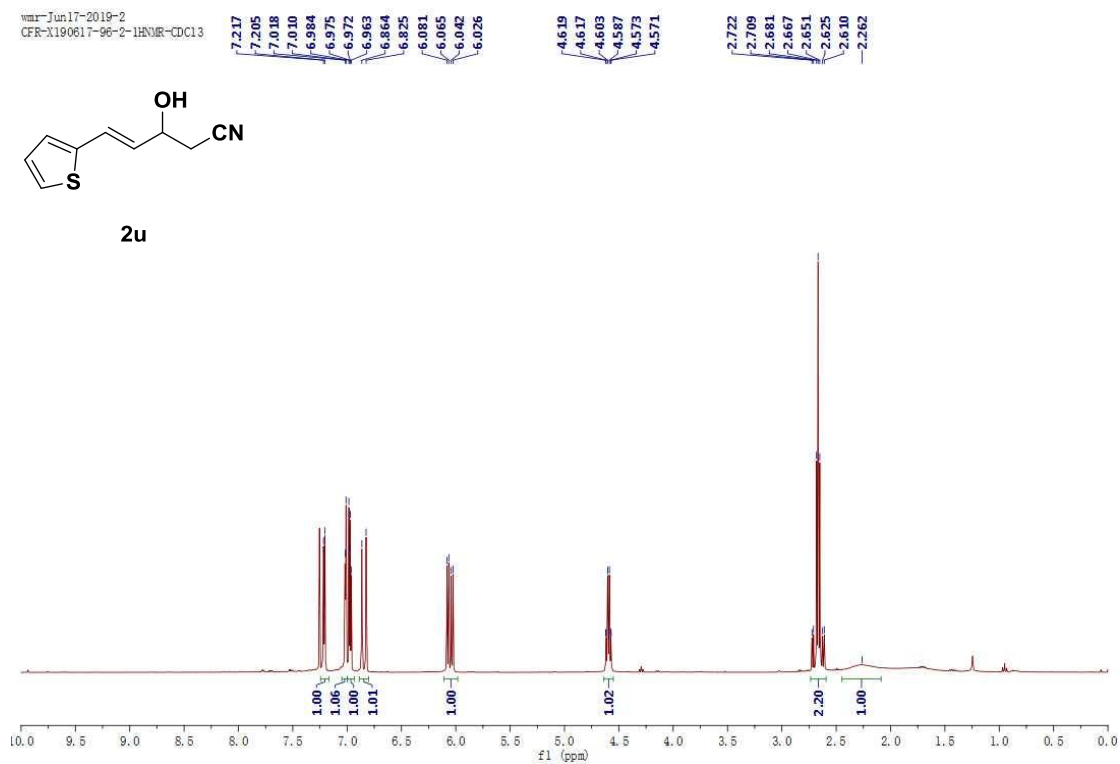

## 2u-<sup>13</sup>C NMR

war-Jun17-2019-1  
CFR-X190617-96-2-13CNMR-CDCl3

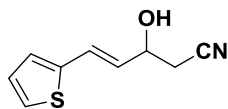

2u

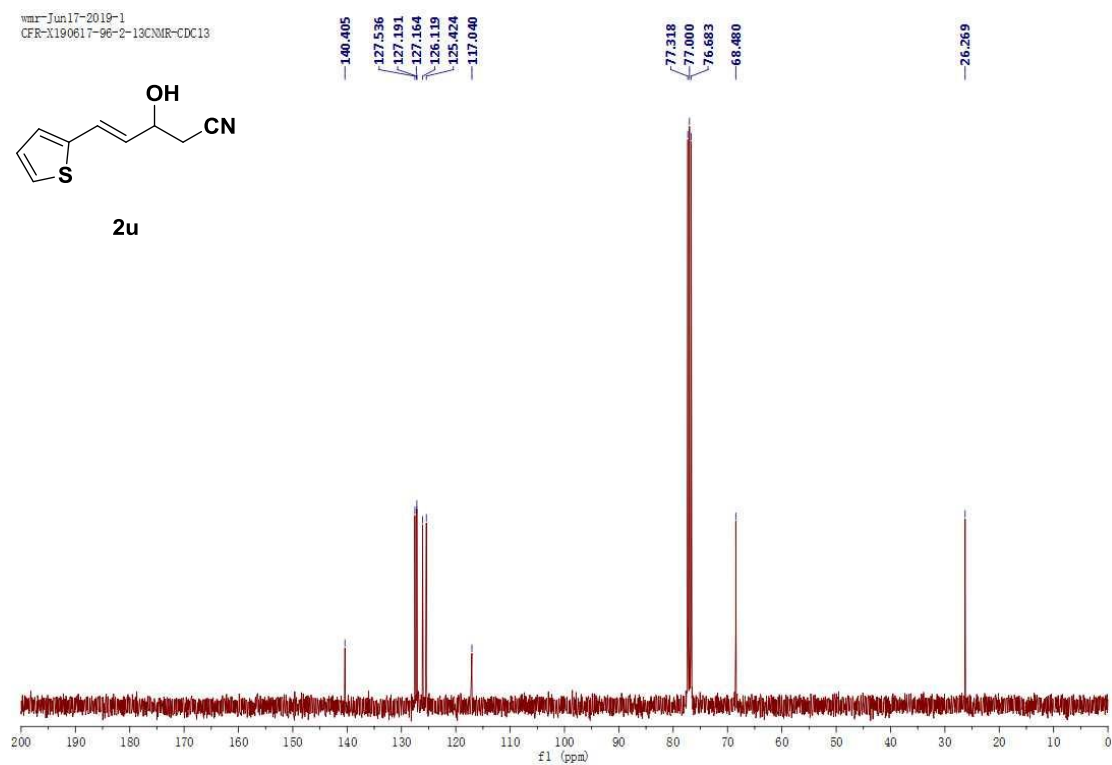

## 2v-<sup>1</sup>H NMR

war-Mar27-2019-1  
CFR-X190327-58-2-<sup>1</sup>H NMR-CDC13

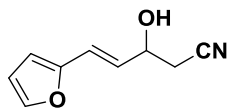

2v

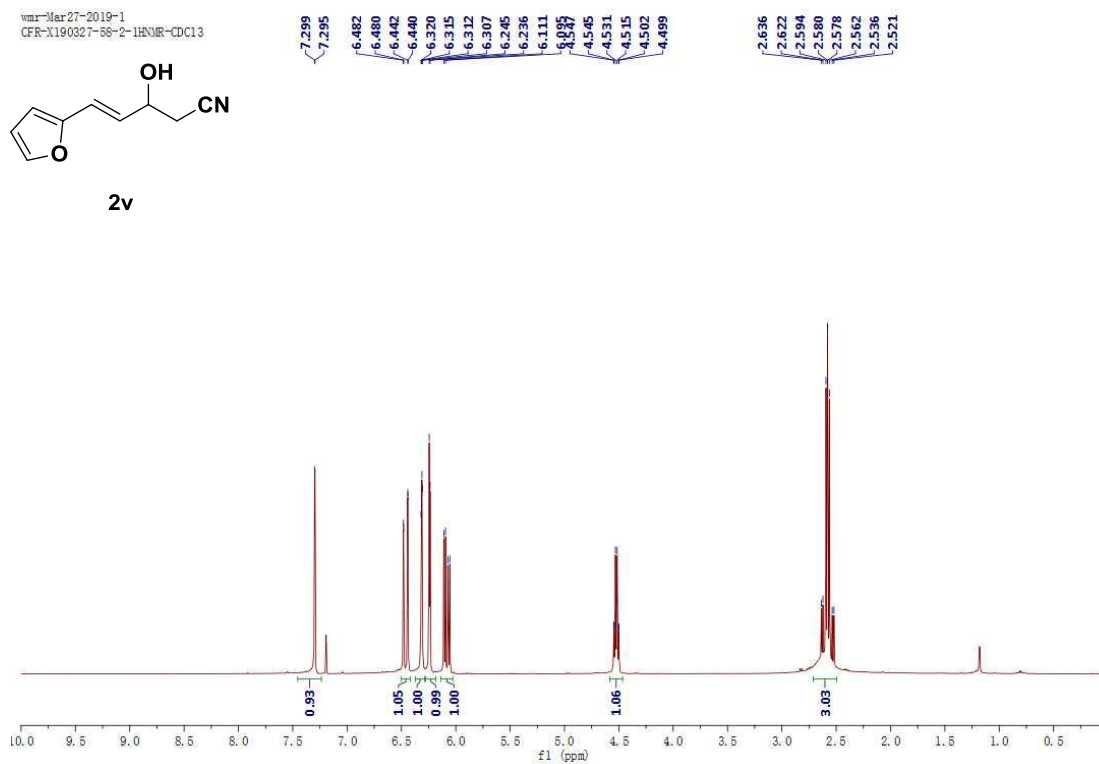

## 2v-<sup>13</sup>C NMR

war-Mar27-2019-1  
CFR-X190327-58-2-<sup>13</sup>C NMR-CDC13

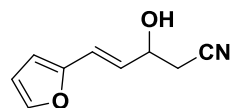

2v

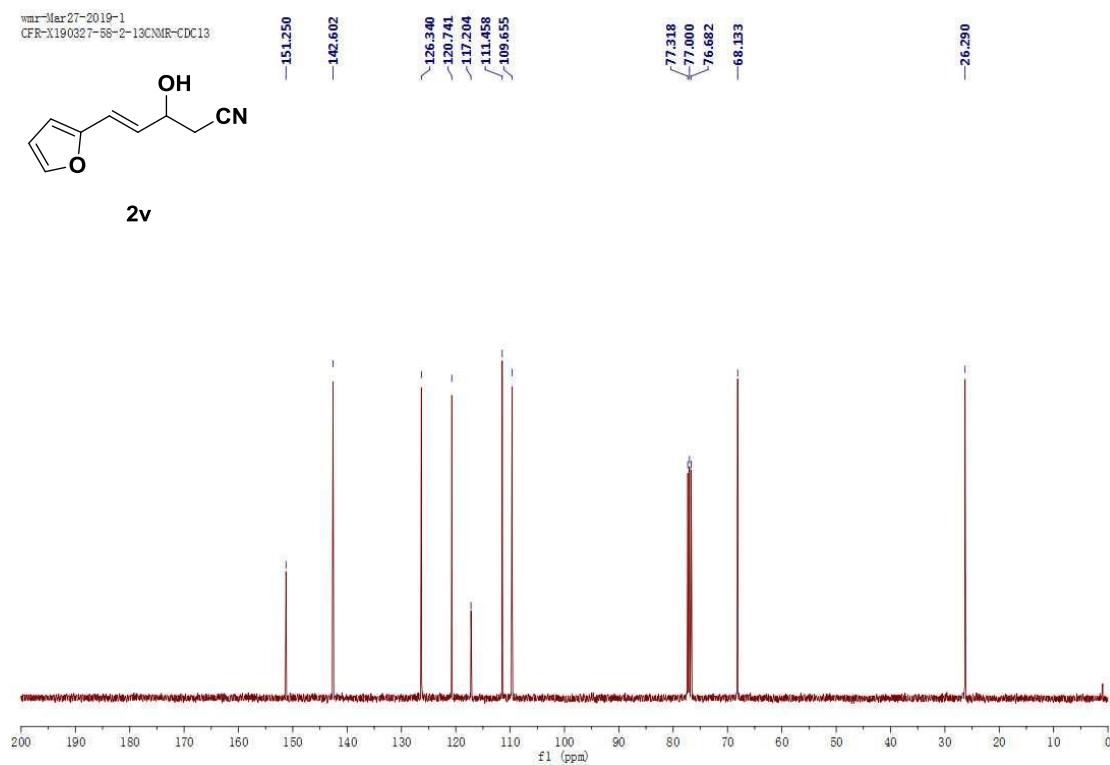

## 2w-<sup>1</sup>H NMR

Jul19-2019 CFR-111

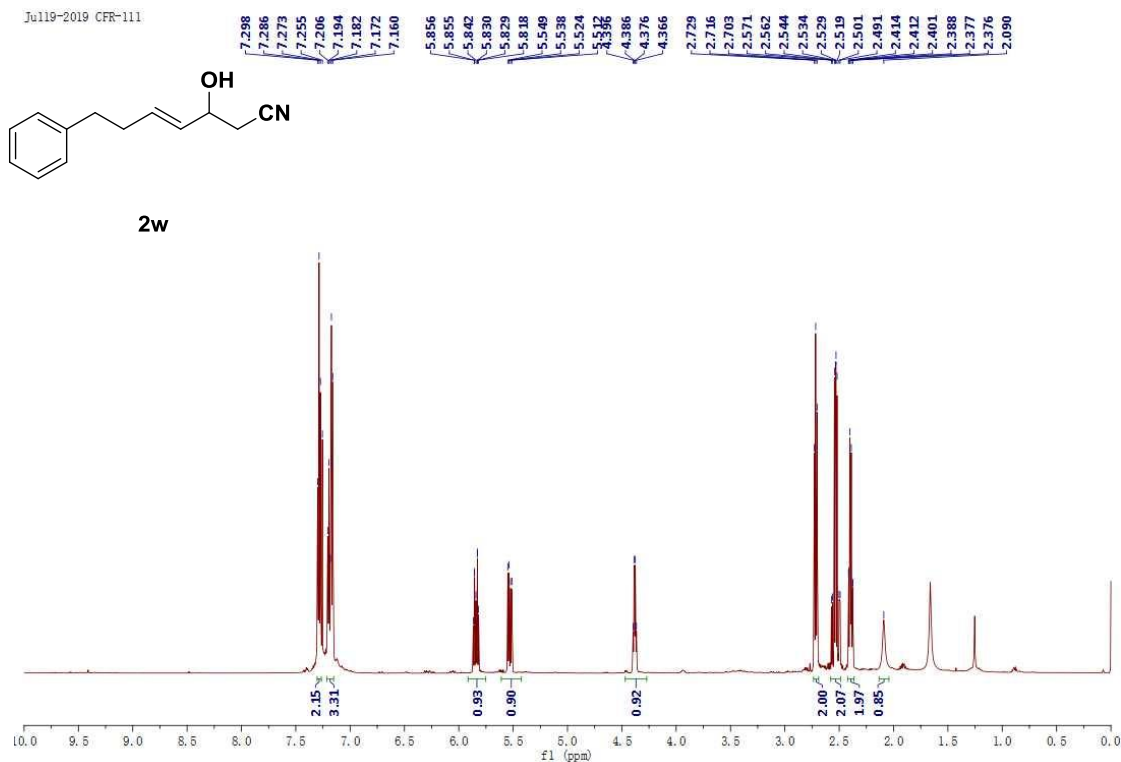

## 2w-<sup>13</sup>C NMR

Jul19-2019 CFR-111

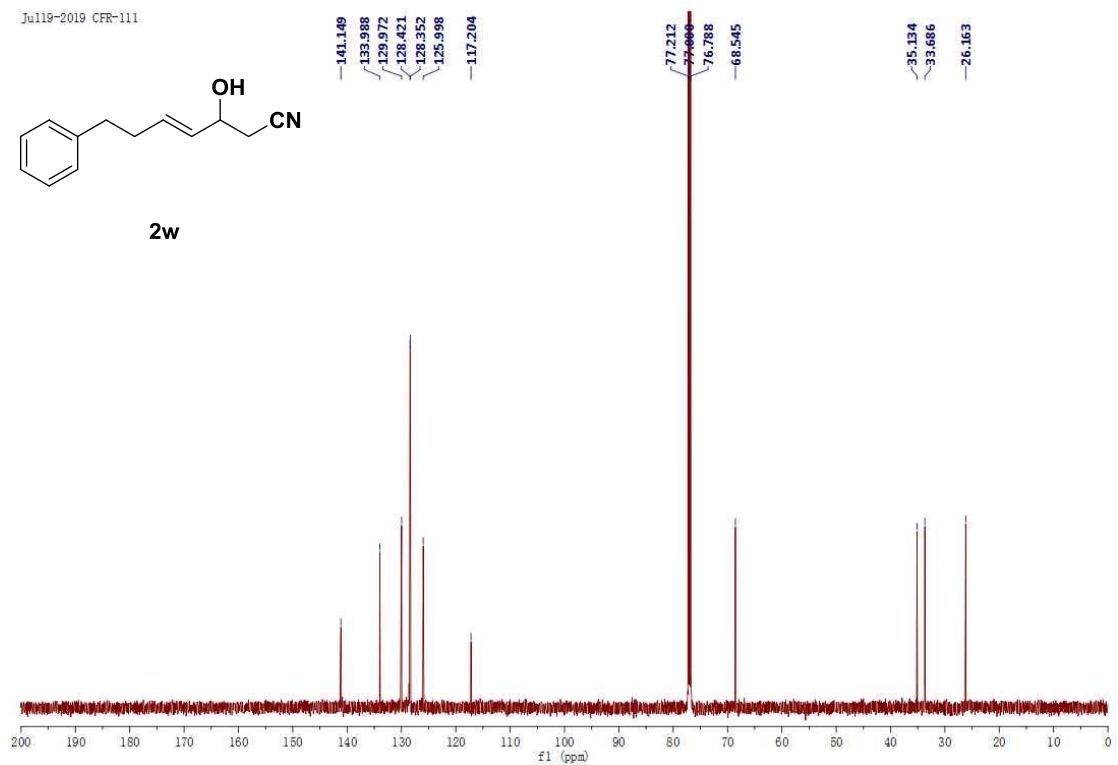

## 2x-<sup>1</sup>H NMR

CFR-112-H  
CFR-112

<sup>1</sup>H 1D 2019 07 10

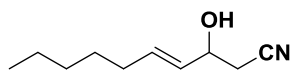

2x

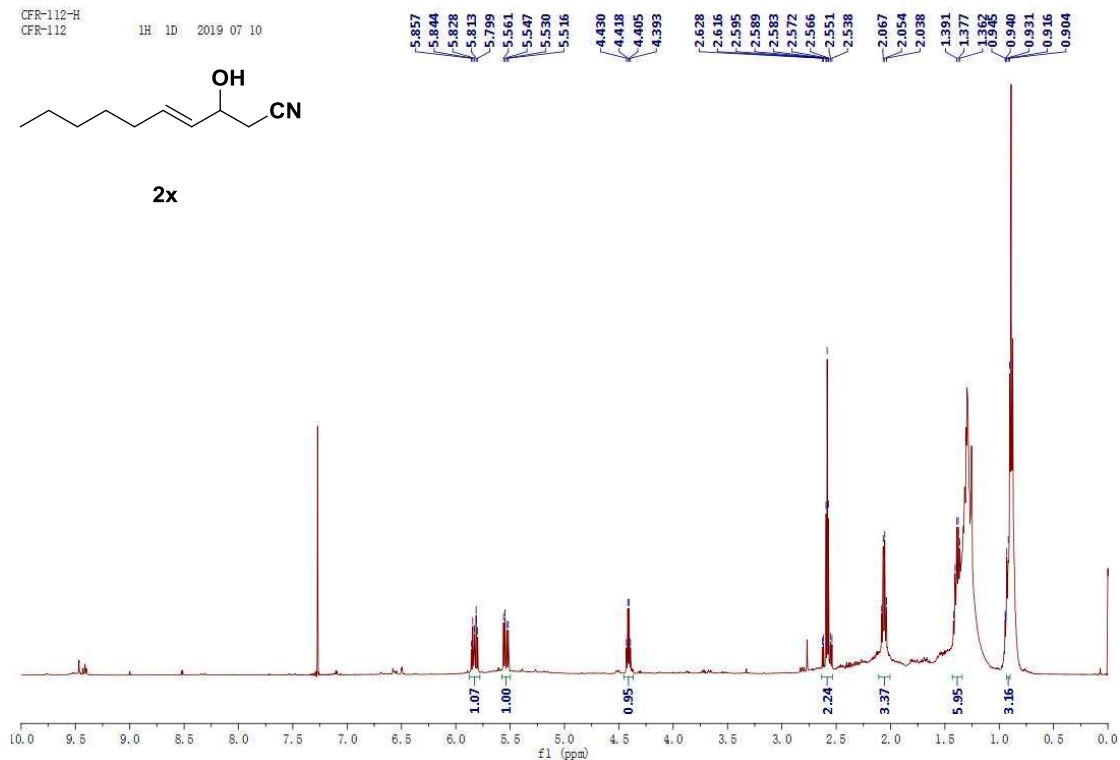

## 2x-<sup>13</sup>C NMR

CFR-112  
CFR-112 13C 190711

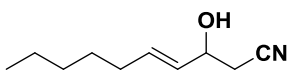

2x

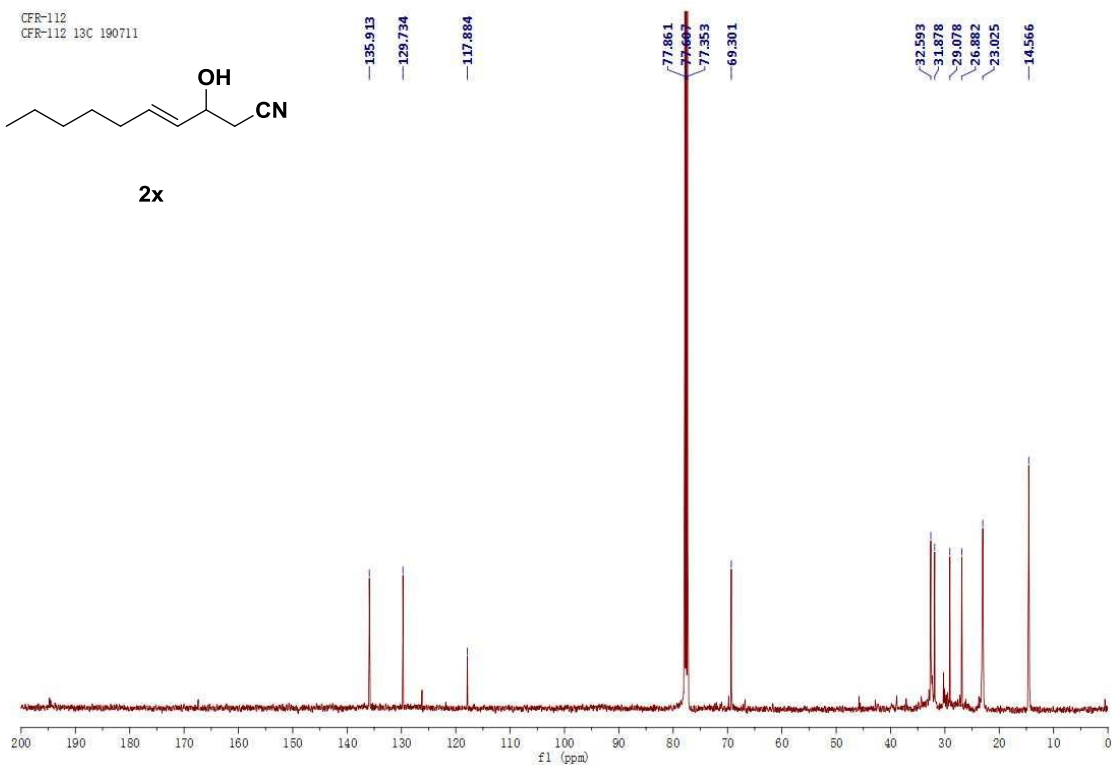

# 2y-<sup>1</sup>H NMR

Jul26-2019-student:TK-CJR

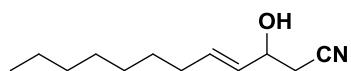

2y

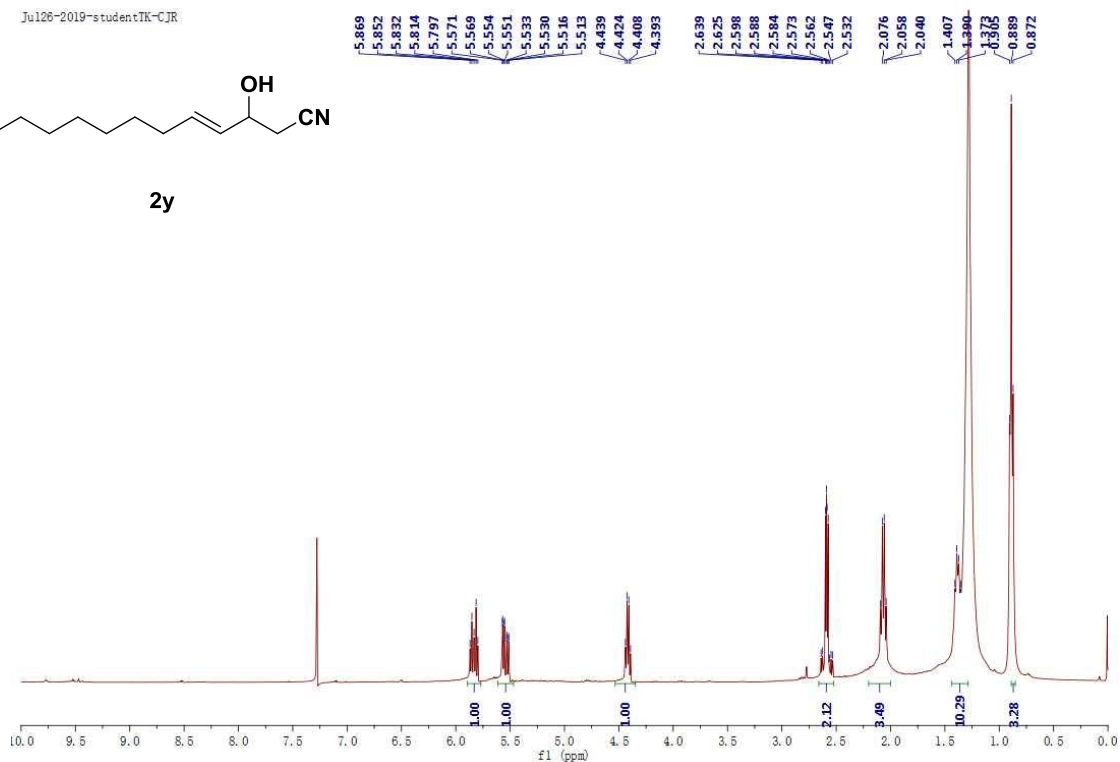

# 2y-<sup>13</sup>C NMR

CFR-113

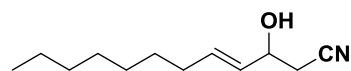

2y

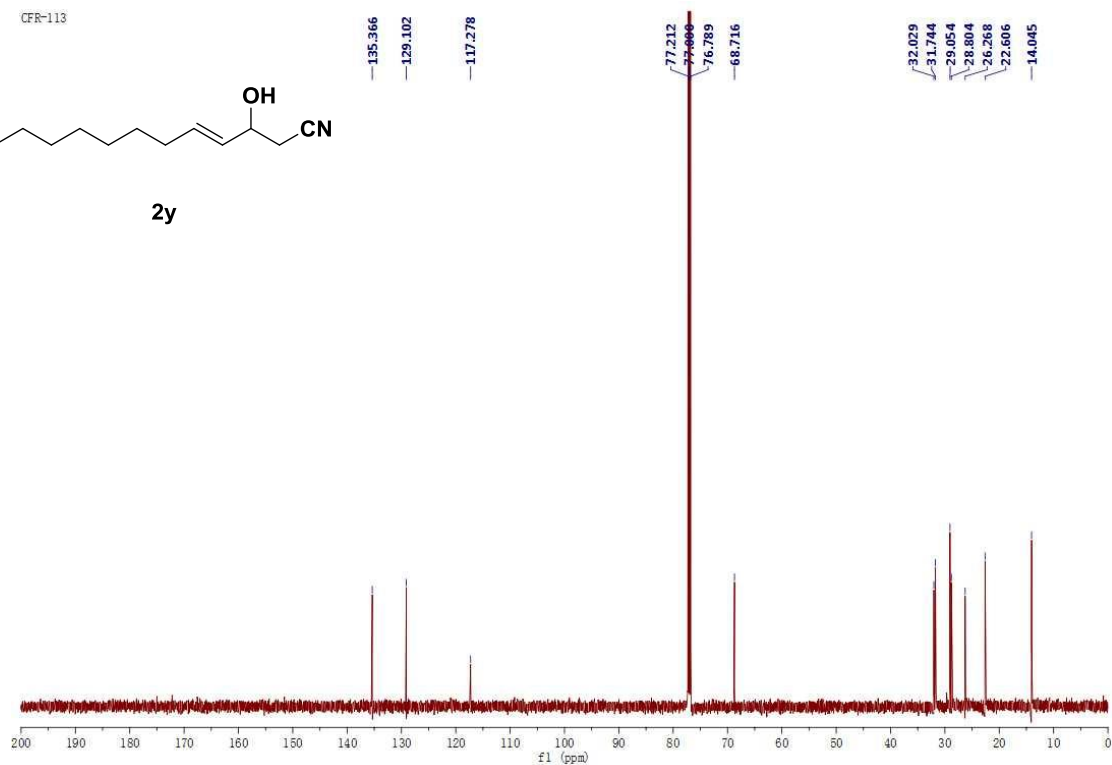

### 3-<sup>1</sup>H NMR

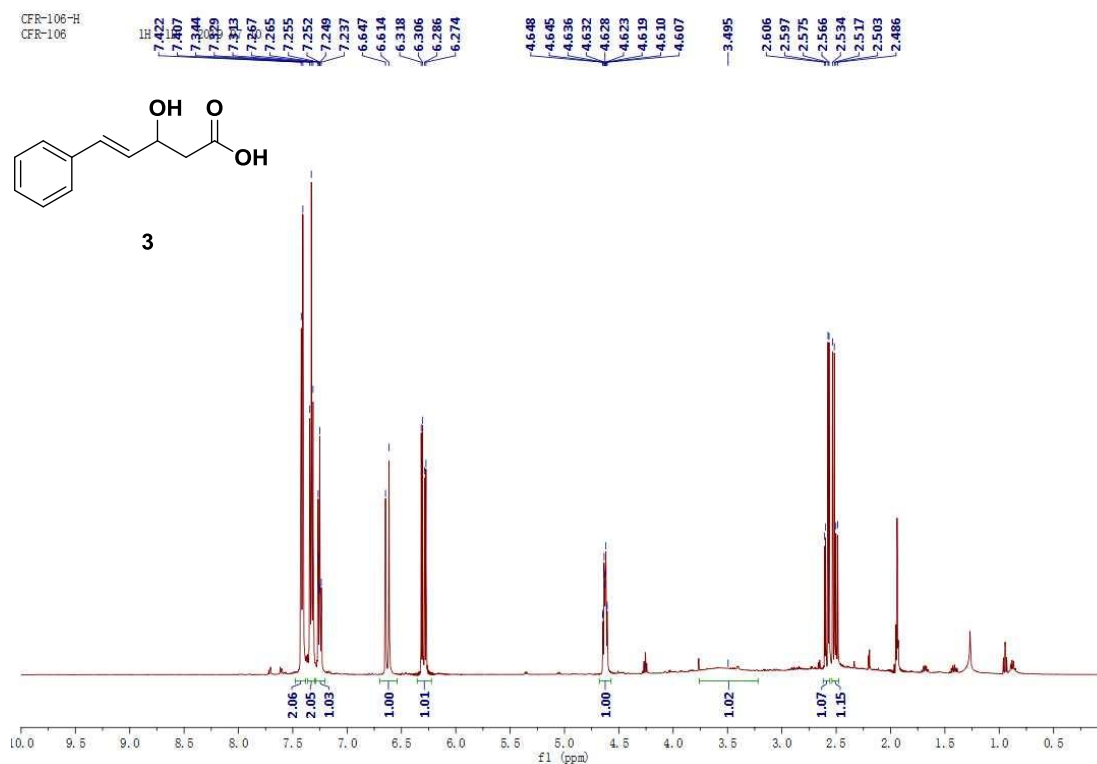

### 3-<sup>13</sup>C NMR

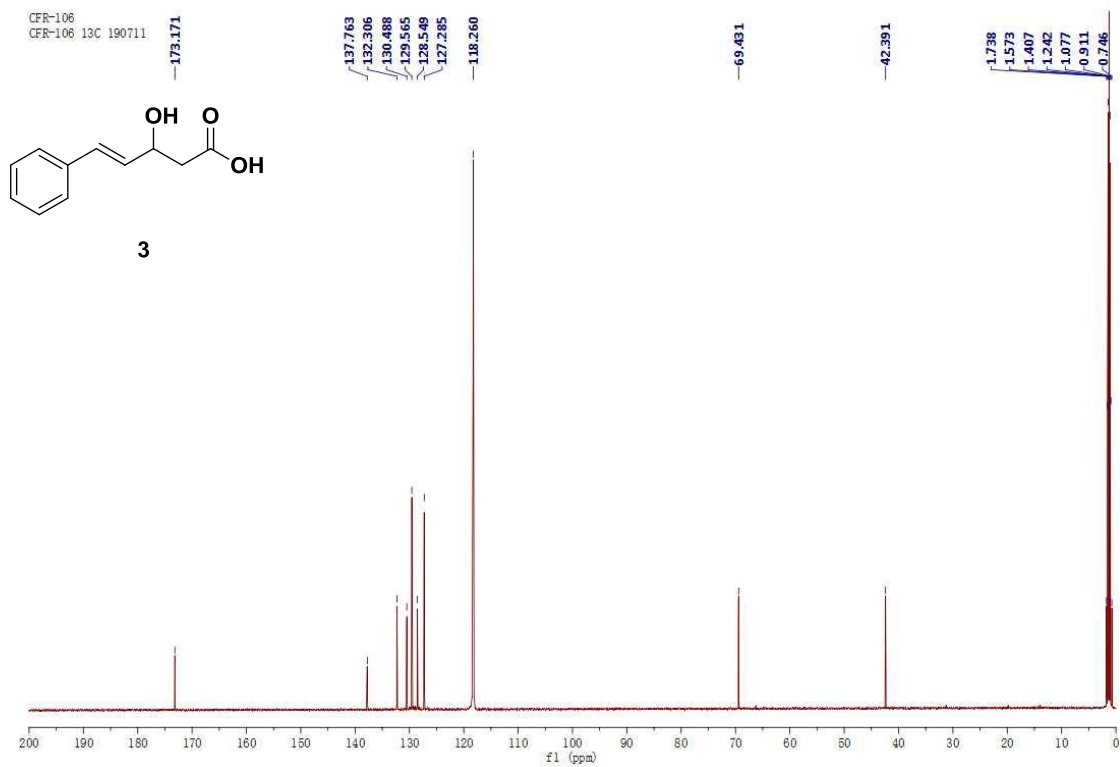



# 4-<sup>1</sup>H NMR

wmr-Sep02-2019-3  
CFR-X190902-105 (2)-1HNMR

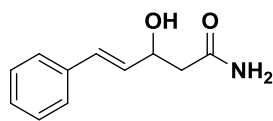

4

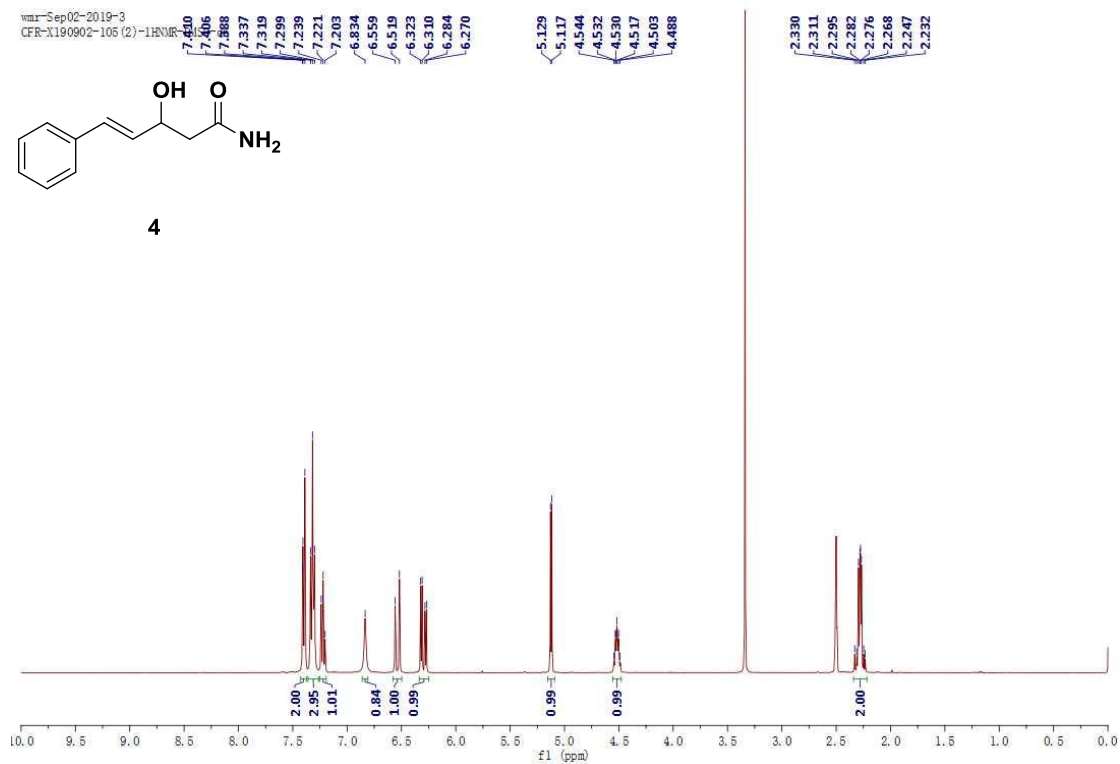

# 4-<sup>13</sup>C NMR

wmr-Sep02-2019-3  
CFR-X190902-105 (2)-13C

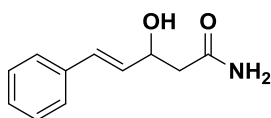

4

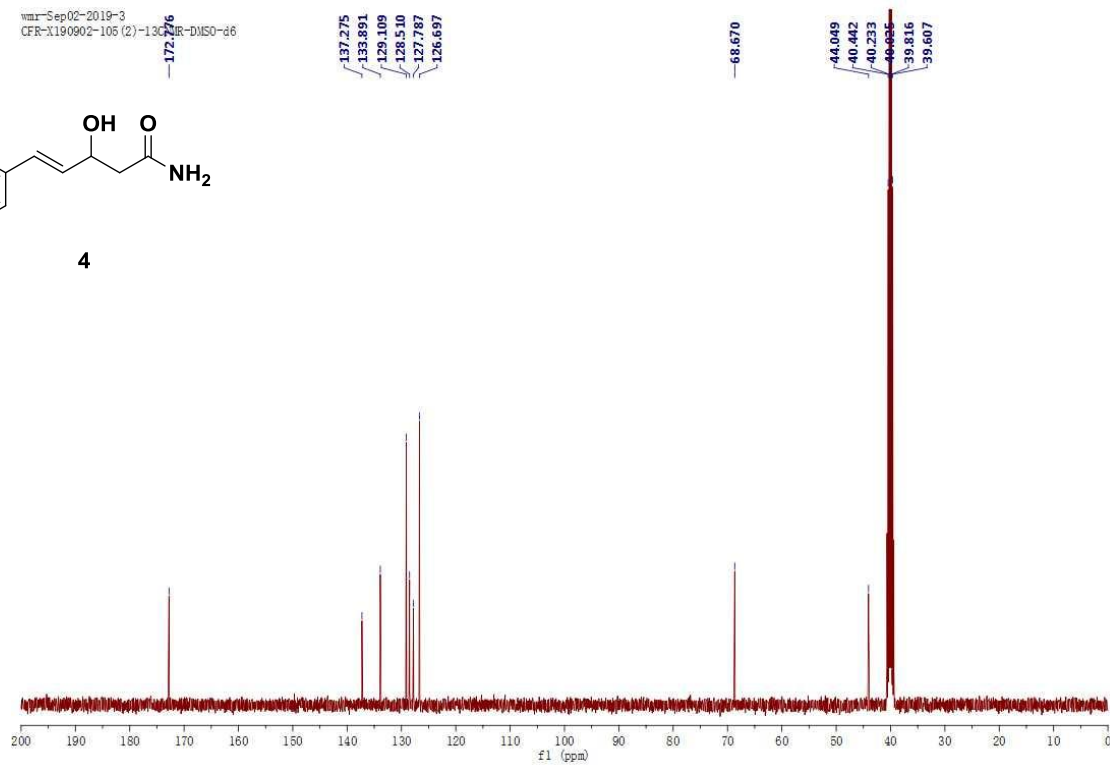

### 5a+5b <sup>1</sup>H NMR

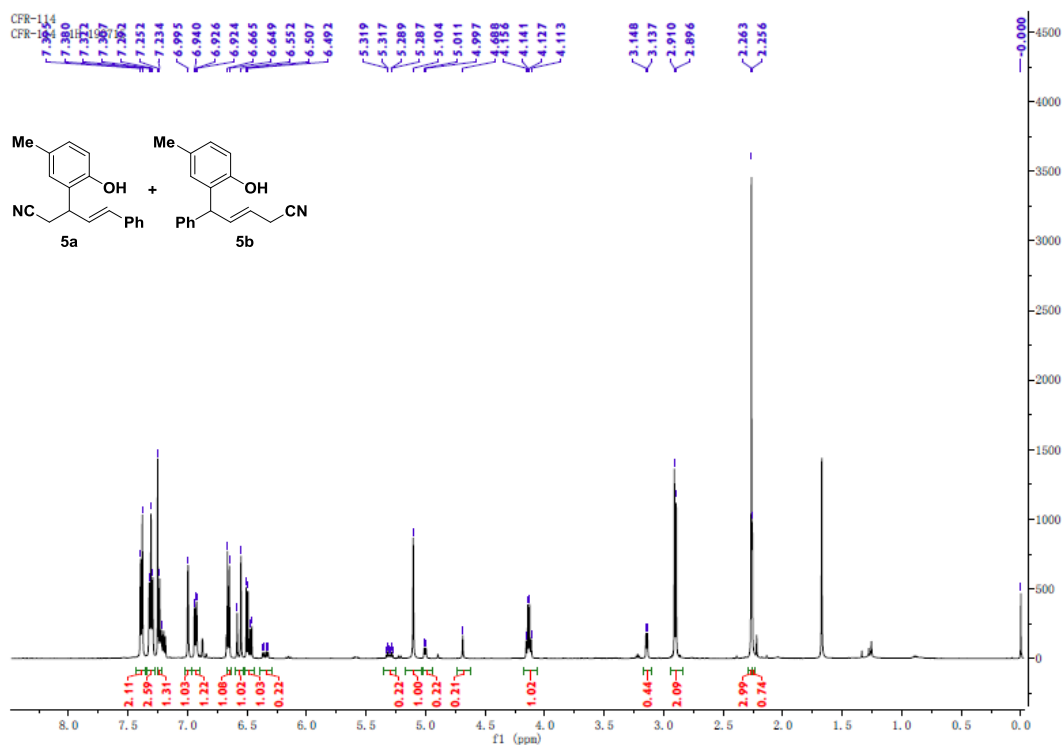

### 5a+5b <sup>13</sup>C NMR

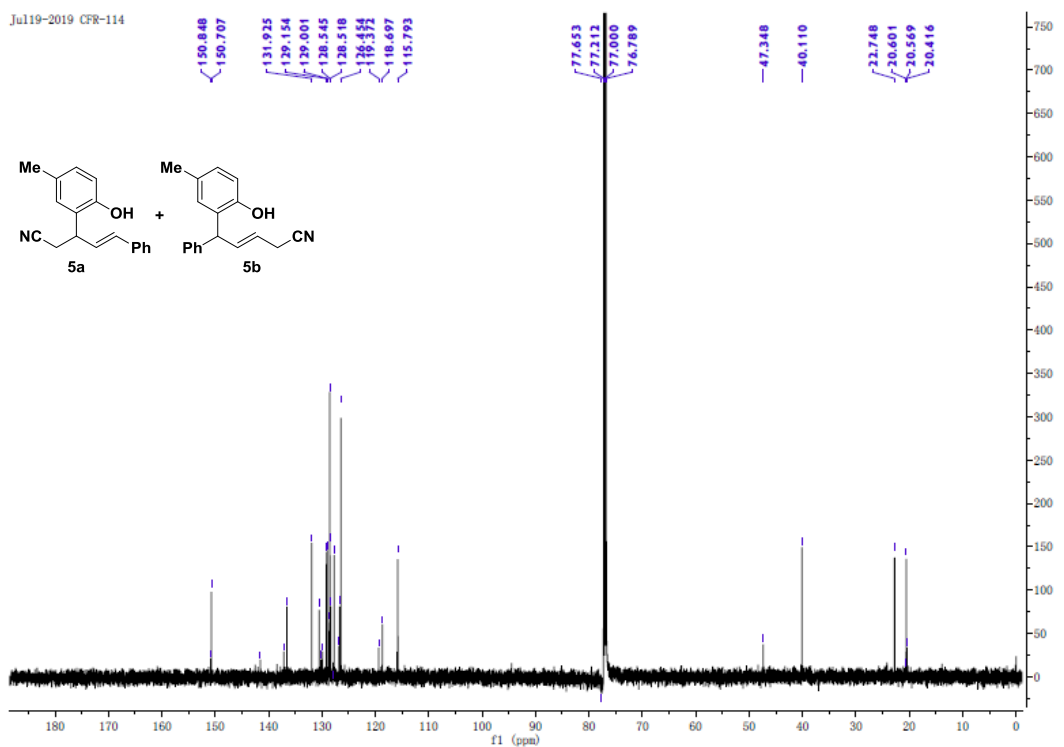

### 6a+6b <sup>1</sup>H NMR

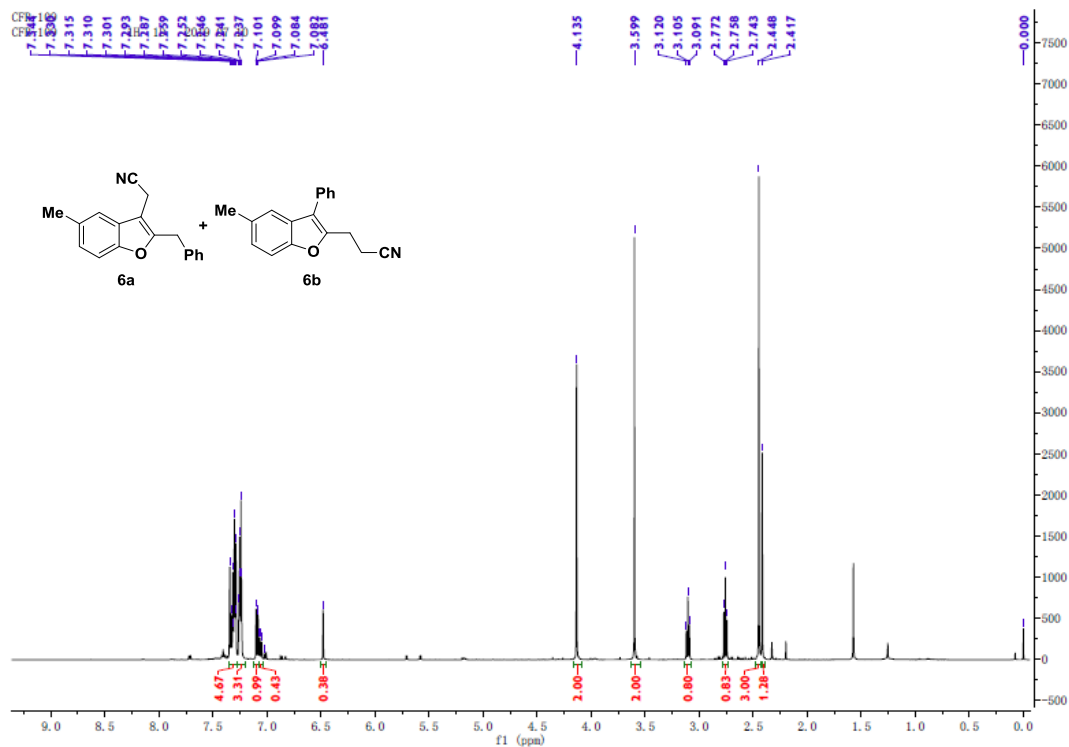

### 6a+6b <sup>13</sup>C NMR

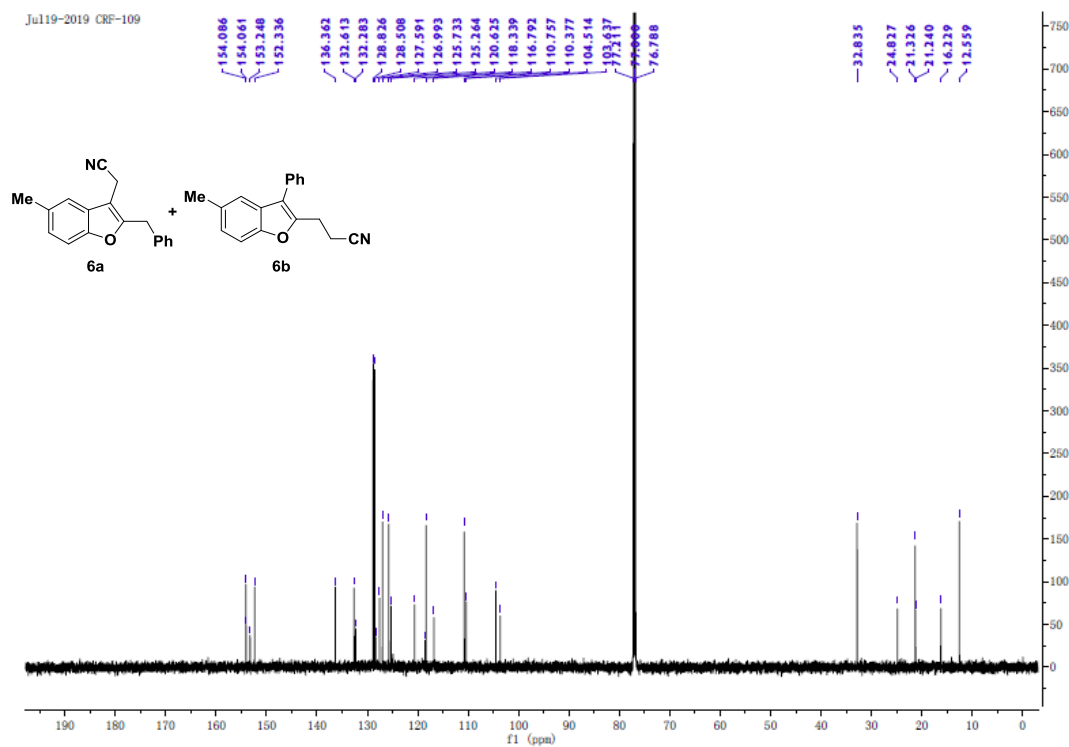

## VII. References

1. Katritzky, A. R.; Pilarski, B.; Urogdi, L. *Synthesis*, **1989**, 949-950.
2. Pamies, O.; Backvall, J.-E. *Adv. Synth. Catal.* **2002**, *344*, 947-952.
3. Rehan, M.; Nallagonda, R.; Das, B. G.; Meena, T.; Ghorai, P. *J. Org. Chem.* **2017**, *82*, 3411–3424.
